# Supplementary material for: Direct benzylic C–H difluoroalkylation with difluoroenoxysilanes by transition metal-free photoredox catalysis
Source: Royal Society of Chemistry journal article supplement (doi:10.1039/d2qo00857b), 2022-01-01

*Supporting Information*

**Direct benzylic C–H difluoroalkylation with  
difluoroenoxy silanes by transition metal-free photoredox  
catalysis**

*Jing Gui,<sup>a,b</sup> Manman Sun,<sup>b</sup> Haijian Wu,<sup>b</sup> Jinshan Li,<sup>b</sup> Jianguo Yang<sup>\*a,b</sup> and Zhiming Wang<sup>\*a,b</sup>*

*<sup>a</sup> Department of Chemistry, Zhejiang Sci-Tech University, Hangzhou, 310018,  
Zhejiang, China.*

*<sup>b</sup> Advanced Research Institute and Department of Chemistry, Taizhou University,  
Jiaojiang, 318000, Zhejiang, China.*

*E-mail: yjg@tzc.edu.cn, zhiming@tzc.edu.cn, wzmmol@hotmail.com*

**Table of Contents**

|                                                                                                                       |            |
|-----------------------------------------------------------------------------------------------------------------------|------------|
| <b>General information</b> .....                                                                                      | <b>S2</b>  |
| <b>General procedure for preparation of products 3</b> .....                                                          | <b>S2</b>  |
| <b>Procedure for preparation of compound 4</b> .....                                                                  | <b>S18</b> |
| <b>Procedure for preparation of compound 5</b> .....                                                                  | <b>S19</b> |
| <b>Procedure for preparation of compound 6</b> .....                                                                  | <b>S20</b> |
| <b>The singlet oxygen capture experiment with <math>\alpha</math>-terpinene</b> .....                                 | <b>S21</b> |
| <b>References</b> .....                                                                                               | <b>S22</b> |
| <b>Copies of <math>^1\text{H}</math>, <math>^{13}\text{C}</math> and <math>^{19}\text{F}</math> NMR spectra</b> ..... | <b>S24</b> |

**General information.**  $^1\text{H}$ ,  $^{13}\text{C}$  and  $^{19}\text{F}$  NMR spectra were recorded on a Bruker Avance 400 instrument at 400 ( $^1\text{H}$  NMR), 100 ( $^{13}\text{C}$  NMR), and 376 MHz ( $^{19}\text{F}$  NMR). Tetramethylsilane (TMS) and  $\text{CDCl}_3$  (7.26 ppm for  $^1\text{H}$  NMR, 77.0 ppm for  $^{13}\text{C}$  NMR) were used as references. Data for  $^1\text{H}$  NMR were reported as follows: chemical shift (ppm), multiplicity (s = singlet, d = doublet, t = triplet, q = quartet, dd = doublet of doublets, m = multiplet, br = broad singlet), coupling constants (Hz), and integration. Data for  $^{13}\text{C}$  NMR were reported as ppm. High-resolution mass spectra analyses were performed on a Waters SYNAPT G2-Si mass spectrometer. Melting points were determined using a X-4 digital micro melting point apparatus. Thin-layer chromatography (TLC) was performed, and visualization of the compounds was accomplished with UV light (254 nm). Flash column chromatography was performed on silica gel (200–300 mesh). Reactions were carried out using 1.5 W green LED (555nm) on a synLED-16 A discover. Known compounds xanthenes **1a–1k**,<sup>1</sup> **1p**,<sup>2</sup> **1q**,<sup>2</sup> acridines **1l–1n**,<sup>3</sup> thioxanthene **1o**,<sup>4</sup> allylic and propargylic substrates **1w–1aa**,<sup>5</sup> and difluoroenoxy silanes **2**<sup>6</sup> were prepared according to literature procedures. Purchased reagents and solvents were used without further purification.

### General procedure for preparation of products **3**.

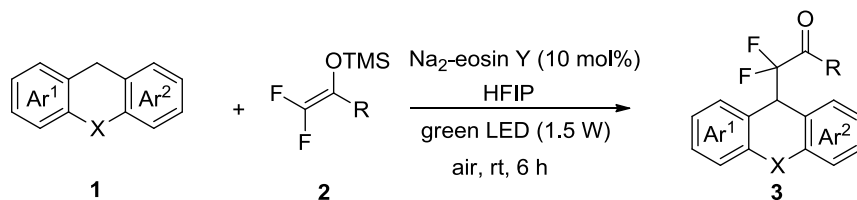

To a mixture of **1** (0.2 mmol) and **2** (0.4 mmol, 2.0 equiv) in HFIP (2.0 mL) was added  $\text{Na}_2$ -eosin Y (13.8 mg, 0.02 mmol, 10 mol%). The mixture was exposed to green LED (1.5 W) and stirred at room temperature under air for 6 h. Then the mixture was concentrated in vacuo, and purified by column chromatography on silica gel (PE/EA, 30:1 or 20:1) to afford the desired products **3**.

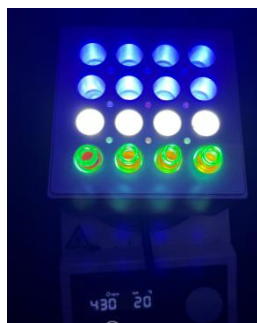

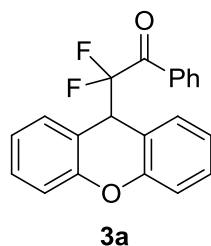

**2,2-Difluoro-1-phenyl-2-(9H-xanthen-9-yl)ethanone (3a).** Yellow solid; 56.4 mg, 84% yield, PE/EA = 30/1 as the eluent; mp = 62–63 °C;  $^1\text{H NMR}$  (400 MHz,  $\text{CDCl}_3$ )  $\delta$  7.67 (d,  $J = 7.8$  Hz, 2H), 7.49 (t,  $J = 7.5$  Hz, 1H), 7.35–7.25 (m, 6H), 7.15 (d,  $J = 8.1$  Hz, 2H), 7.04 (t,  $J = 7.6$  Hz, 2H), 4.96 (t,  $J = 14.2$  Hz, 1H);  $^{13}\text{C NMR}$  (100 MHz,  $\text{CDCl}_3$ )  $\delta$  191.0 (t,  $J = 29.6$  Hz), 153.5, 133.9, 133.1, 130.6, 129.8 (t,  $J = 3.6$  Hz), 129.5, 128.3, 123.2, 118.0 (t,  $J = 260.5$  Hz), 116.8, 116.2 (t,  $J = 3.2$  Hz), 44.4 (t,  $J = 23.8$  Hz);  $^{19}\text{F NMR}$  (376 MHz,  $\text{CDCl}_3$ )  $\delta$  -103.16 (d,  $J = 14.3$  Hz, 2F). Physical and spectral properties of this material were identical to those previously reported in literature.<sup>7</sup>

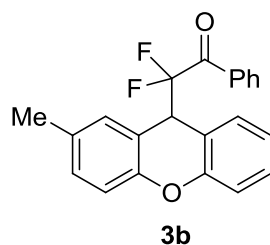

**2,2-Difluoro-2-(2-methyl-9H-xanthen-9-yl)-1-phenylethanone (3b).** Yellow oil; 56.7 mg, 81% yield, PE/EA = 30/1 as the eluent;  $^1\text{H NMR}$  (400 MHz,  $\text{CDCl}_3$ )  $\delta$  7.66 (d,  $J = 6.7$  Hz, 2H), 7.49 (t,  $J = 7.4$  Hz, 1H), 7.33–7.26 (m, 4H), 7.17–6.99 (m, 5H), 4.89 (t,  $J = 14.3$  Hz, 1H), 2.26 (s, 3H);  $^{13}\text{C NMR}$  (100 MHz,  $\text{CDCl}_3$ )  $\delta$  191.1 (t,  $J = 29.4$  Hz), 153.7, 151.4, 133.9, 133.2 (t,  $J = 1.9$  Hz), 132.7, 130.8, 130.6, 130.1, 129.8 (t,  $J = 3.9$  Hz), 129.4, 128.3, 123.1, 118.1 (t,  $J = 259.1$  Hz), 116.8, 116.5, 116.2 (t,  $J = 3.2$  Hz), 115.8 (t,  $J = 3.2$  Hz), 44.5 (t,  $J = 23.9$  Hz), 20.6;  $^{19}\text{F NMR}$  (376 MHz,  $\text{CDCl}_3$ )  $\delta$  -102.86 (dd,  $J = 259.4, 13.9$  Hz, 1F), -103.62 (dd,  $J = 268.1, 14.3$  Hz, 1F); **HRMS**

(ESI)  $m/z$  calcd for  $[M + Na]^+$   $C_{22}H_{16}F_2O_2Na$  373.1011, found 373.1017.

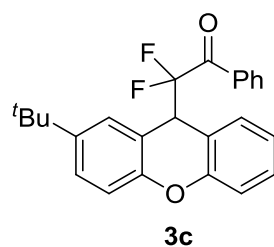

**2-(2-(*tert*-Butyl)-9H-xanthen-9-yl)-2,2-difluoro-1-phenylethanone (3c).** Yellow oil; 47.0 mg, 60% yield, PE/EA = 30/1 as the eluent;  $^1H$  NMR (400 MHz,  $CDCl_3$ )  $\delta$  7.52 (d,  $J = 7.8$  Hz, 2H), 7.39 (t,  $J = 7.4$  Hz, 1H), 7.29–7.16 (m, 5H), 7.09 (s, 1H), 7.08 (d,  $J = 8.5$  Hz, 1H), 7.02–6.97 (m, 2H), 4.85 (dd,  $J = 17.4, 11.7$  Hz, 1H), 1.07 (s, 9H);  $^{13}C$  NMR (100 MHz,  $CDCl_3$ )  $\delta$  191.8 (t,  $J = 28.6$  Hz), 153.7, 151.3, 146.1, 133.8, 133.3, 130.7, 129.8 (t,  $J = 3.7$  Hz), 129.4, 128.3, 127.3, 126.4, 123.1, 118.2 (t,  $J = 258.4$  Hz), 116.7, 116.3, 116.2 (d,  $J = 4.9$  Hz), 115.2 (d,  $J = 4.9$  Hz), 44.9 (t,  $J = 23.9$  Hz), 34.1, 31.2;  $^{19}F$  NMR (376 MHz,  $CDCl_3$ )  $\delta$  -101.31 (dd,  $J = 260.5, 12.2$  Hz, 1F), -106.33 (dd,  $J = 260.2, 17.3$  Hz, 1F); HRMS (ESI)  $m/z$  calcd for  $[M + Na]^+$   $C_{25}H_{22}F_2O_2Na$  415.1480, found 415.1490.

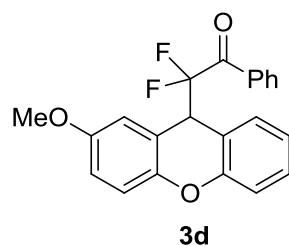

**2,2-Difluoro-2-(2-methoxy-9H-xanthen-9-yl)-1-phenylethanone (3d).** Yellow oil; 45.4 mg, 62% yield, PE/EA = 20/1 as the eluent;  $^1H$  NMR (400 MHz,  $CDCl_3$ )  $\delta$  7.69 (d,  $J = 8.3$  Hz, 2H), 7.51 (t,  $J = 7.4$  Hz, 1H), 7.37–7.26 (m, 4H), 7.13 (d,  $J = 8.6$  Hz, 1H), 7.09 (d,  $J = 8.8$  Hz, 1H), 7.03 (t,  $J = 7.4$  Hz, 1H), 6.87–6.82 (m, 2H), 4.92 (t,  $J = 14.2$  Hz, 1H), 3.72 (s, 3H);  $^{13}C$  NMR (100 MHz,  $CDCl_3$ )  $\delta$  191.0 (t,  $J = 29.2$  Hz), 155.3, 153.8, 147.6, 134.0, 133.2 (t,  $J = 1.9$  Hz), 130.6, 129.8 (t,  $J$

= 3.7 Hz), 129.4, 128.3, 123.0, 118.1 (t,  $J = 260.8$  Hz), 117.6, 116.78 (t,  $J = 2.8$  Hz), 116.77, 115.78 (t,  $J = 2.8$  Hz), 115.77, 114.7, 55.7, 44.8 (t,  $J = 23.8$  Hz);  $^{19}\text{F}$  NMR (376 MHz,  $\text{CDCl}_3$ )  $\delta$  -102.66 (dd,  $J = 265.8, 13.9$  Hz, 1F), -103.40 (dd,  $J = 265.5, 14.5$  Hz, 1F); **HRMS (ESI)**  $m/z$  calcd for  $[\text{M} + \text{Na}]^+ \text{C}_{22}\text{H}_{16}\text{F}_2\text{O}_3\text{Na}$  389.0960, found 389.0971.

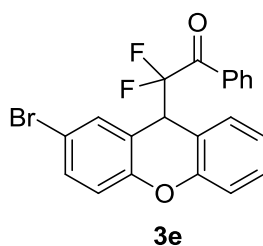

**2-(2-Bromo-9H-xanthen-9-yl)-2,2-difluoro-1-phenylethanone (3e).** Yellow oil; 78.0 mg, 94% yield, PE/EA = 30/1 as the eluent;  $^1\text{H}$  NMR (400 MHz,  $\text{CDCl}_3$ )  $\delta$  7.74 (d,  $J = 7.2$  Hz, 2H), 7.53 (t,  $J = 7.5$  Hz, 1H), 7.47 (s, 1H), 7.39 (dd,  $J = 8.7, 2.4$  Hz, 1H), 7.34 (t,  $J = 7.9$  Hz, 2H), 7.33–7.26 (m, 2H), 7.14 (d,  $J = 8.2$  Hz, 1H), 7.06 (d,  $J = 6.2$  Hz, 1H), 7.03 (d,  $J = 8.7$  Hz, 1H), 4.92 (t,  $J = 13.2$ , Hz, 1H);  $^{13}\text{C}$  NMR (100 MHz,  $\text{CDCl}_3$ )  $\delta$  190.2 (t,  $J = 29.7$  Hz), 153.1, 152.6, 134.1, 133.2, 132.9 (t,  $J = 2.0$  Hz), 132.4, 130.6, 129.8 (t,  $J = 3.7$  Hz), 129.7, 128.4, 123.6, 118.5, 118.4 (t,  $J = 3.0$  Hz), 117.8 (t,  $J = 259.3$  Hz), 116.9, 115.6 (t,  $J = 3.3$  Hz), 115.3, 44.1 (t,  $J = 23.9$  Hz);  $^{19}\text{F}$  NMR (376 MHz,  $\text{CDCl}_3$ )  $\delta$  -101.82 (dd,  $J = 271.5, 13.4$  Hz, 1F), -103.73 (dd,  $J = 271.3, 14.9$  Hz, 1F); **HRMS (ESI)**  $m/z$  calcd for  $[\text{M} + \text{Na}]^+ \text{C}_{21}\text{H}_{13}\text{BrF}_2\text{O}_2\text{Na}$  436.9959, found 436.9966.

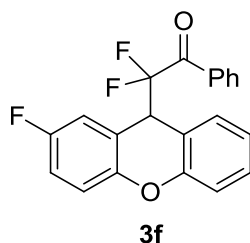

**2,2-Difluoro-2-(2-fluoro-9H-xanthen-9-yl)-1-phenylethanone (3f).** Yellow solid; 51.7 mg, 73% yield, PE/EA = 30/1 as the eluent; mp = 77–78 °C;  $^1\text{H}$  NMR (400 MHz,  $\text{CDCl}_3$ )  $\delta$  7.73 (d,  $J = 7.0$

Hz, 2H), 7.53 (t,  $J = 7.4$  Hz, 1H), 7.37–7.27 (m, 4H), 7.16–6.98 (m, 5H), 4.95 (t,  $J = 14.0$  Hz, 1H);  $^{13}\text{C}$  NMR (100 MHz,  $\text{CDCl}_3$ )  $\delta$  190.4 (t,  $J = 29.4$  Hz), 158.3 (d,  $J = 241.6$  Hz), 153.5, 149.7 (d,  $J = 2.5$  Hz), 134.1, 133.0 (t,  $J = 2.0$  Hz), 130.6, 129.8 (t,  $J = 3.7$  Hz), 129.6, 128.4, 123.1, 117.9 (d,  $J = 8.4$  Hz), 117.8 (t,  $J = 259.5$  Hz), 117.7 (t,  $J = 3.0$  Hz), 116.9, 116.8 (d,  $J = 23.8$  Hz), 116.4 (d,  $J = 23.5$  Hz), 115.4 (t,  $J = 3.0$  Hz), 44.4 (t,  $J = 23.7$  Hz);  $^{19}\text{F}$  NMR (376 MHz,  $\text{CDCl}_3$ )  $\delta$  -102.16 (dd,  $J = 271.0, 13.7$  Hz, 1F), -103.40 (dd,  $J = 270.7, 14.3$  Hz, 1F), -120.03 – -120.09 (m, 1F); HRMS (ESI)  $m/z$  calcd for  $[\text{M} + \text{Na}]^+$   $\text{C}_{21}\text{H}_{13}\text{F}_3\text{O}_2\text{Na}$  377.0760, found 377.0763.

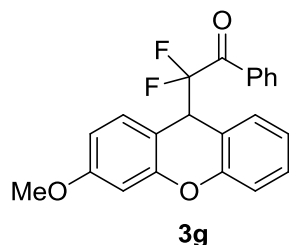

**2,2-Difluoro-2-(3-methoxy-9H-xanthen-9-yl)-1-phenylethanone (3g).** Yellow oil; 61.5 mg, 84% yield, PE/EA = 20/1 as the eluent;  $^1\text{H}$  NMR (400 MHz,  $\text{CDCl}_3$ )  $\delta$  7.69 (d,  $J = 7.6$  Hz, 2H), 7.50 (t,  $J = 7.4$  Hz, 1H), 7.34–7.27 (m, 4H), 7.20 (d,  $J = 8.5$  Hz, 1H), 7.13 (d,  $J = 7.7$  Hz, 1H), 7.04 (t,  $J = 7.5$  Hz, 1H), 6.69 (d,  $J = 2.5$  Hz, 1H), 6.63 (dd,  $J = 8.5, 2.6$  Hz, 1H), 4.90 (t,  $J = 14.1$  Hz, 1H), 3.79 (s, 3H);  $^{13}\text{C}$  NMR (100 MHz,  $\text{CDCl}_3$ )  $\delta$  191.1 (t,  $J = 29.6$  Hz), 160.7, 154.4, 153.4, 133.9, 133.2 (t,  $J = 2.0$  Hz), 131.1, 130.6, 129.8 (t,  $J = 3.7$  Hz), 129.4, 128.3, 123.2, 118.1 (t,  $J = 258.5$  Hz), 116.8, 116.5 (t,  $J = 3.0$  Hz), 110.1, 108.2 (t,  $J = 3.3$  Hz), 101.8, 55.4, 43.9 (t,  $J = 23.8$  Hz);  $^{19}\text{F}$  NMR (376 MHz,  $\text{CDCl}_3$ )  $\delta$  -102.87 (dd,  $J = 265.5, 14.1$  Hz, 1F), -103.65 (dd,  $J = 264.7, 14.3$  Hz, 1F); HRMS (ESI)  $m/z$  calcd for  $[\text{M} + \text{Na}]^+$   $\text{C}_{22}\text{H}_{16}\text{F}_2\text{O}_3\text{Na}$  389.0960, found 389.0968.

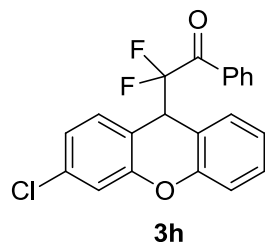

**2-(3-Chloro-9H-xanthen-9-yl)-2,2-difluoro-1-phenylethanone (3h).** Yellow solid; 57.1 mg, 77% yield, PE/EA = 30/1 as the eluent; mp = 75–76 °C;  $^1\text{H NMR}$  (400 MHz,  $\text{CDCl}_3$ )  $\delta$  7.71 (d,  $J = 7.4$  Hz, 2H), 7.53 (t,  $J = 7.4$  Hz, 1H), 7.36–7.25 (m, 5H), 7.17 (d,  $J = 2.1$  Hz, 1H), 7.14 (d,  $J = 7.4$  Hz, 1H), 7.08–7.04 (m, 2H), 4.94 (t,  $J = 14.0$  Hz, 1H);  $^{13}\text{C NMR}$  (100 MHz,  $\text{CDCl}_3$ )  $\delta$  190.5 (t,  $J = 29.7$  Hz), 154.0, 153.1, 134.9, 134.1, 132.9 (t,  $J = 2.1$  Hz), 131.5, 130.6, 129.8 (t,  $J = 3.7$  Hz), 129.6, 128.4, 123.6, 123.5, 117.8 (t,  $J = 260.9$  Hz), 117.2, 116.9, 115.9 (t,  $J = 3.2$  Hz), 115.0 (t,  $J = 3.1$  Hz), 43.9 (t,  $J = 23.8$  Hz);  $^{19}\text{F NMR}$  (376 MHz,  $\text{CDCl}_3$ )  $\delta$  -102.38 (dd,  $J = 270.5, 13.8$  Hz, 1F), -103.46 (dd,  $J = 270.6, 14.6$  Hz, 1F); **HRMS (ESI)**  $m/z$  calcd for  $[\text{M} + \text{Na}]^+$   $\text{C}_{21}\text{H}_{13}\text{ClF}_2\text{O}_2\text{Na}$  393.0464, found 393.0468.

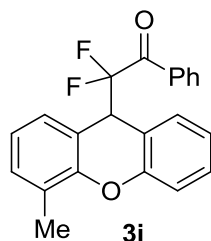

**2,2-Difluoro-2-(4-methyl-9H-xanthen-9-yl)-1-phenylethanone (3i).** Yellow oil; 52.5 mg, 75% yield, PE/EA = 30/1 as the eluent;  $^1\text{H NMR}$  (400 MHz,  $\text{CDCl}_3$ )  $\delta$  7.66 (d,  $J = 7.5$  Hz, 2H), 7.50 (t,  $J = 7.4$  Hz, 1H), 7.34–7.28 (m, 4H), 7.19 (dd,  $J = 8.6, 1.3$  Hz, 1H), 7.13 (t,  $J = 7.2$  Hz, 2H), 7.04 (td,  $J = 7.4, 1.3$  Hz, 1H), 6.95 (t,  $J = 7.5$  Hz, 1H), 4.94 (t,  $J = 14.4$  Hz, 1H), 2.38 (s, 3H);  $^{13}\text{C NMR}$  (100 MHz,  $\text{CDCl}_3$ )  $\delta$  191.1 (t,  $J = 29.1$  Hz), 153.7, 151.7, 133.9, 133.3 (t,  $J = 1.9$  Hz), 130.8, 130.5, 129.8 (t,  $J = 3.7$  Hz), 129.3, 128.3, 128.1, 126.2, 123.2, 122.7, 118.2 (t,  $J = 260.7$  Hz),

117.0, 116.5 (t,  $J = 3.0$  Hz), 115.8 (t,  $J = 3.0$  Hz), 44.7 (t,  $J = 23.8$  Hz), 15.8;  $^{19}\text{F}$  NMR (376 MHz,  $\text{CDCl}_3$ )  $\delta$  -103.06 (dd,  $J = 264.0, 14.6$  Hz, 1F), -103.85 (dd,  $J = 263.6, 14.6$  Hz, 1F); **HRMS (ESI)**  $m/z$  calcd for  $[\text{M} + \text{Na}]^+ \text{C}_{22}\text{H}_{16}\text{F}_2\text{O}_2\text{Na}$  373.1011, found 373.1016.

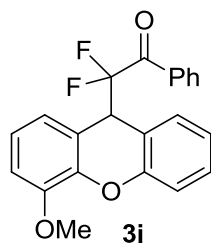

**2,2-Difluoro-2-(4-methoxy-9H-xanthen-9-yl)-1-phenylethanone (3j).** Yellow oil; 41.7 mg, 57% yield, PE/EA = 20/1 as the eluent;  $^1\text{H}$  NMR (400 MHz,  $\text{CDCl}_3$ )  $\delta$  7.67 (d,  $J = 6.8$  Hz, 2H), 7.50 (t,  $J = 7.5$  Hz, 1H), 7.34–7.26 (m, 5H), 7.05 (t,  $J = 9.6$  Hz, 1H), 6.99 (t,  $J = 8.4$  Hz, 1H), 6.90 (d,  $J = 8.5$  Hz, 2H), 4.97 (t,  $J = 14.3$  Hz, 1H), 3.93 (s, 3H);  $^{13}\text{C}$  NMR (100 MHz,  $\text{CDCl}_3$ )  $\delta$  191.1 (t,  $J = 29.6$  Hz), 153.4, 148.2, 143.2, 133.9, 133.2 (t,  $J = 1.7$  Hz), 130.5, 129.8 (t,  $J = 3.7$  Hz), 129.4, 128.3, 123.4, 122.9, 122.2, 118.0 (t,  $J = 260.5$  Hz), 117.1, 116.1 (t,  $J = 3.3$  Hz), 111.8, 56.2, 44.4 (t,  $J = 23.9$  Hz);  $^{19}\text{F}$  NMR (376 MHz,  $\text{CDCl}_3$ )  $\delta$  -103.34 (d,  $J = 14.1$  Hz, 2F); **HRMS (ESI)**  $m/z$  calcd for  $[\text{M} + \text{Na}]^+ \text{C}_{22}\text{H}_{16}\text{F}_2\text{O}_3\text{Na}$  389.0960, found 389.0964.

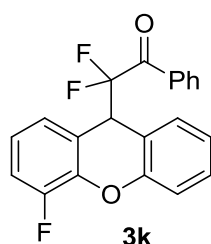

**2,2-Difluoro-2-(4-fluoro-9H-xanthen-9-yl)-1-phenylethanone (3k).** Yellow oil; 45.3 mg, 64% yield, PE/EA = 30/1 as the eluent;  $^1\text{H}$  NMR (400 MHz,  $\text{CDCl}_3$ )  $\delta$  7.71 (d,  $J = 7.1$  Hz, 2H), 7.52 (t,  $J = 7.5$  Hz, 1H), 7.37–7.29 (m, 4H), 7.25 (d,  $J = 7.6$  Hz, 1H), 7.15–7.06 (m, 3H), 7.02–6.96 (m, 1H), 5.01 (t,  $J = 14.1$  Hz, 1H);  $^{13}\text{C}$  NMR (100 MHz,  $\text{CDCl}_3$ )  $\delta$  190.7 (t,  $J = 29.5$  Hz), 152.9, 151.2



(d,  $J = 248.5$  Hz), 142.0 (d,  $J = 11.6$  Hz), 134.1, 133.0 (t,  $J = 1.7$  Hz), 130.7, 129.8 (t,  $J = 3.7$  Hz), 129.7, 128.5, 125.6 (d,  $J = 3.8$  Hz), 123.9, 122.8 (d,  $J = 7.2$  Hz), 119.0 (t,  $J = 2.9$  Hz), 117.9 (t,  $J = 259.3$  Hz), 117.2, 116.2 (d,  $J = 17.5$  Hz), 115.9 (t,  $J = 2.9$  Hz), 44.1 (t,  $J = 23.6$  Hz);  **$^{19}\text{F}$  NMR** (376 MHz,  $\text{CDCl}_3$ )  $\delta$  -102.57 (dd,  $J = 268.5, 14.1$  Hz, 1F), -103.43 (dd,  $J = 268.5, 14.2$  Hz, 1F), -135.017 – -135.065 (m, 1F); **HRMS (ESI)**  $m/z$  calcd for  $[\text{M} + \text{Na}]^+$   $\text{C}_{21}\text{H}_{13}\text{F}_3\text{O}_2\text{Na}$  377.0760, found 377.0762.

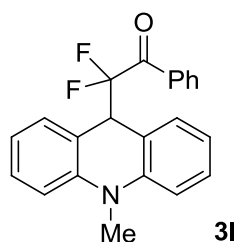

**2,2-Difluoro-2-(10-methyl-9,10-dihydroacridin-9-yl)-1-phenylethanone (3l).** Yellow solid; 67.0 mg, 96% yield, PE/EA = 30/1 as the eluent; mp = 125–126 °C;  **$^1\text{H}$  NMR** (400 MHz,  $\text{CDCl}_3$ )  $\delta$  7.48–7.39 (m, 3H), 7.32 (d,  $J = 7.6$  Hz, 2H), 7.29–7.24 (m, 2H), 7.21 (t,  $J = 8.4$  Hz, 2H), 6.98 (t,  $J = 7.4$  Hz, 2H), 6.76 (d,  $J = 8.2$  Hz, 2H), 4.88 (t,  $J = 13.6$  Hz, 1H), 3.01 (s, 3H);  **$^{13}\text{C}$  NMR** (100 MHz,  $\text{CDCl}_3$ )  $\delta$  189.1 (t,  $J = 28.0$  Hz), 143.3, 133.4, 133.3, 130.5, 129.6 (t,  $J = 3.7$  Hz), 128.8, 127.9, 120.8, 118.7 (t,  $J = 259.8$  Hz), 117.8 (t,  $J = 3.3$  Hz), 112.7, 49.7 (t,  $J = 24.6$  Hz), 32.7;  **$^{19}\text{F}$  NMR** (376 MHz,  $\text{CDCl}_3$ )  $\delta$  -102.67 (d,  $J = 13.6$  Hz, 2F); **HRMS (ESI)**  $m/z$  calcd for  $[\text{M} + \text{Na}]^+$   $\text{C}_{22}\text{H}_{17}\text{F}_2\text{NONa}$  372.1170, found 372.1179.

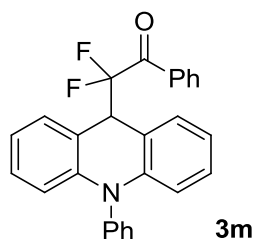

**2,2-Difluoro-1-phenyl-2-(10-phenyl-9,10-dihydroacridin-9-yl)ethanone (3m).** Brown solid; 42.7 mg, 52% yield, PE/EA = 30/1 as the eluent; mp = 102–103 °C;  **$^1\text{H}$  NMR** (400 MHz,  $\text{CDCl}_3$ )

$\delta$  7.59–7.52 (m, 4H), 7.50–7.44 (m, 2H), 7.31 (d,  $J = 7.5$  Hz, 2H), 7.25 (d,  $J = 9.2$  Hz, 2H), 7.17 (d,  $J = 7.5$  Hz, 2H), 7.05 (t,  $J = 7.0$  Hz, 2H), 6.91 (t,  $J = 6.9$  Hz, 2H), 6.30 (d,  $J = 8.3$  Hz, 2H), 5.06 (t,  $J = 14.3$  Hz, 1H);  $^{13}\text{C}$  NMR (100 MHz,  $\text{CDCl}_3$ )  $\delta$  191.4 (t,  $J = 28.9$  Hz), 143.0, 140.1, 133.6, 133.5, 130.80, 130.78, 130.7, 129.8 (t,  $J = 3.4$  Hz), 128.5, 128.4, 128.2, 120.8, 118.6 (t,  $J = 260.5$  Hz), 114.8 (t,  $J = 2.9$  Hz), 114.5, 48.2 (t,  $J = 23.5$  Hz);  $^{19}\text{F}$  NMR (376 MHz,  $\text{CDCl}_3$ )  $\delta$  -103.99 (d,  $J = 14.1$  Hz, 2F); HRMS (ESI)  $m/z$  calcd for  $[\text{M} + \text{Na}]^+$   $\text{C}_{27}\text{H}_{19}\text{F}_2\text{NONa}$  434.1327, found 434.1331.

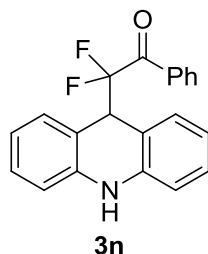

**2-(9,10-Dihydroacridin-9-yl)-2,2-difluoro-1-phenylethanone (3n).** Brown solid; 40.2 mg, 60% yield, PE/EA = 20/1 as the eluent; mp = 133–134 °C;  $^1\text{H}$  NMR (400 MHz,  $\text{CDCl}_3$ )  $\delta$  7.56 (d,  $J = 7.9$  Hz, 2H), 7.46 (t,  $J = 7.5$  Hz, 1H), 7.29–7.21 (m, 4H), 7.16 (t,  $J = 7.7$  Hz, 2H), 6.88 (t,  $J = 7.5$  Hz, 2H), 6.72 (d,  $J = 8.1$  Hz, 2H), 6.19 (br, 1H), 4.98 (t,  $J = 14.7$  Hz, 1H);  $^{13}\text{C}$  NMR (100 MHz,  $\text{CDCl}_3$ )  $\delta$  191.8 (t,  $J = 28.7$  Hz), 140.7, 133.6, 133.5, 130.9, 129.7 (t,  $J = 3.7$  Hz), 128.8, 128.1, 120.9, 118.7 (t,  $J = 260.2$  Hz), 114.1, 113.8 (t,  $J = 3.1$  Hz), 47.7 (t,  $J = 23.6$  Hz);  $^{19}\text{F}$  NMR (376 MHz,  $\text{CDCl}_3$ )  $\delta$  -103.89 (d,  $J = 14.7$  Hz, 2F); HRMS (ESI)  $m/z$  calcd for  $[\text{M} + \text{Na}]^+$   $\text{C}_{21}\text{H}_{15}\text{F}_2\text{NONa}$  358.1014, found 358.1022.

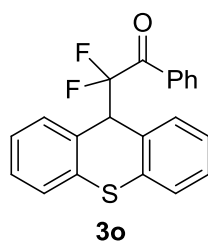

**2,2-Difluoro-1-phenyl-2-(9H-thioxanthen-9-yl)ethanone (3o).** White solid; 39.4 mg, 56% yield,

PE/EA = 30/1 as the eluent; mp = 96–97 °C;  $^1\text{H NMR}$  (400 MHz,  $\text{CDCl}_3$ )  $\delta$  7.60 (d,  $J = 7.8$  Hz, 2H), 7.47 (t,  $J = 7.5$  Hz, 1H), 7.40–7.32 (m, 4H), 7.29–7.17 (m, 6H), 5.06 (t,  $J = 15.9$  Hz, 1H);  $^{13}\text{C NMR}$  (100 MHz,  $\text{CDCl}_3$ )  $\delta$  191.2 (t,  $J = 28.4$  Hz), 134.3, 133.8, 133.3, 131.9, 129.8 (t,  $J = 3.9$  Hz), 128.3, 128.2, 127.4, 126.7, 126.4, 119.3 (t,  $J = 262.3$  Hz), 52.5 (t,  $J = 23.6$  Hz);  $^{19}\text{F NMR}$  (376 MHz,  $\text{CDCl}_3$ )  $\delta$  -101.17 (d,  $J = 16.0$  Hz, 2F); **HRMS (ESI)**  $m/z$  calcd for  $[\text{M} + \text{Na}]^+$   $\text{C}_{21}\text{H}_{14}\text{F}_2\text{NONa}$  375.0626, found 375.0630.

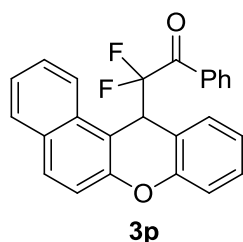

**2-(12H-Benzo[*a*]xanthen-12-yl)-2,2-difluoro-1-phenylethanone (3p).** Yellow solid; 74.1 mg, 96% yield, PE/EA = 30/1 as the eluent; mp = 97–98 °C;  $^1\text{H NMR}$  (400 MHz,  $\text{CDCl}_3$ )  $\delta$  8.13 (d,  $J = 8.6$  Hz, 1H), 7.88–7.77 (m, 2H), 7.60–7.55 (m, 3H), 7.46–7.36 (m, 4H), 7.34–7.28 (m, 1H), 7.26–7.21 (m, 3H), 7.06 (t,  $J = 7.5$  Hz, 1H), 5.76 (dd,  $J = 19.4, 7.2$  Hz, 1H);  $^{13}\text{C NMR}$  (100 MHz,  $\text{CDCl}_3$ )  $\delta$  191.4 (dd,  $J = 30.8, 27.7$  Hz), 153.6, 152.2, 133.9, 133.2, 132.5, 130.7, 130.4, 130.2, 129.7 (dd,  $J = 4.8, 2.7$  Hz), 129.4, 128.5, 128.2, 127.0, 124.5, 123.7, 123.0, 118.9 (t,  $J = 262.3$  Hz), 117.8, 116.8, 116.7 (dd,  $J = 5.9, 2.0$  Hz), 109.3, 40.5 (t,  $J = 24.2$  Hz);  $^{19}\text{F NMR}$  (376 MHz,  $\text{CDCl}_3$ )  $\delta$  -97.16 (dd,  $J = 263.1, 7.4$  Hz, 1F), -107.40 (dd,  $J = 262.9, 19.4$  Hz, 1F); **HRMS (ESI)**  $m/z$  calcd for  $[\text{M} + \text{Na}]^+$   $\text{C}_{25}\text{H}_{16}\text{F}_2\text{O}_2\text{Na}$  409.1011, found 409.1018.

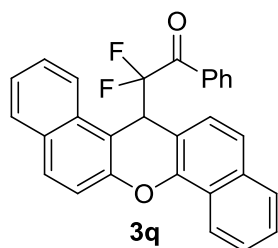

**2-(14H-Dibenzo[*a,h*]xanthen-14-yl)-2,2-difluoro-1-phenylethanone (3q).** White solid; 60.2 mg,

69% yield, PE/EA = 30/1 as the eluent; mp = 173–174 °C;  $^1\text{H NMR}$  (400 MHz,  $\text{CDCl}_3$ )  $\delta$  8.48 (d,  $J = 8.3$  Hz, 1H), 8.19 (d,  $J = 8.6$  Hz, 1H), 7.89–7.79 (m, 3H), 7.62–7.54 (m, 7H), 7.48–7.42 (m, 2H), 7.39 (t,  $J = 7.4$  Hz, 1H), 7.16 (t,  $J = 7.8$  Hz, 2H), 5.89 (dd,  $J = 18.4, 7.5$  Hz, 1H);  $^{13}\text{C NMR}$  (100 MHz,  $\text{CDCl}_3$ )  $\delta$  191.3 (t,  $J = 30.4$  Hz), 152.2, 149.4, 134.0, 133.8, 133.1, 132.5, 130.9, 130.2, 129.6 (dd,  $J = 4.2, 3.2$  Hz), 128.5, 128.1, 127.6, 127.1, 127.0, 126.9, 126.2, 124.6, 124.1, 123.3, 123.1, 121.7, 119.0 (t,  $J = 258.7$  Hz), 117.8, 110.7 (dd,  $J = 5.4, 2.4$  Hz), 109.5 (t,  $J = 2.0$  Hz), 40.8 (t,  $J = 24.2$  Hz);  $^{19}\text{F NMR}$  (376 MHz,  $\text{CDCl}_3$ )  $\delta$  -97.45 (dd,  $J = 263.5, 7.3$  Hz, 1F), -106.64 (dd,  $J = 263.5, 18.3$  Hz, 1F); **HRMS (ESI)**  $m/z$  calcd for  $[\text{M} + \text{Na}]^+$   $\text{C}_{29}\text{H}_{18}\text{F}_2\text{O}_2\text{Na}$  459.1167, found 459.1172.

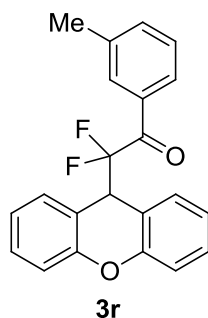

**2,2-Difluoro-1-(*m*-tolyl)-2-(9*H*-xanthen-9-yl)ethanone (3r).** White solid; 49.7 mg, 71% yield, PE/EA = 30/1 as the eluent; mp = 67–68 °C;  $^1\text{H NMR}$  (400 MHz,  $\text{CDCl}_3$ )  $\delta$  7.34 (d,  $J = 7.9$  Hz, 1H), 7.29 (s, 1H), 7.21–7.09 (m, 5H), 7.08–7.00 (m, 3H), 6.92 (t,  $J = 7.4$  Hz, 2H), 4.82 (t,  $J = 14.3$  Hz, 1H), 2.14 (s, 3H);  $^{13}\text{C NMR}$  (100 MHz,  $\text{CDCl}_3$ )  $\delta$  119.2 (t,  $J = 29.2$  Hz), 153.5, 138.1, 134.7, 133.1, 130.7, 130.3 (t,  $J = 3.8$  Hz), 129.4, 128.2, 127.0 (t,  $J = 3.8$  Hz), 123.2, 118.1 (t,  $J = 260.7$  Hz), 116.8, 116.3 (t,  $J = 3.2$  Hz), 44.4 (t,  $J = 23.9$  Hz), 21.2;  $^{19}\text{F NMR}$  (376 MHz,  $\text{CDCl}_3$ )  $\delta$  -103.06 (d,  $J = 14.0$  Hz, 2F); **HRMS (ESI)**  $m/z$  calcd for  $[\text{M} + \text{Na}]^+$   $\text{C}_{22}\text{H}_{16}\text{F}_2\text{O}_2\text{Na}$  373.1011, found 373.1018.

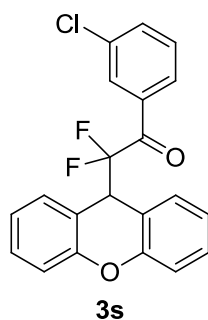

**1-(3-Chlorophenyl)-2,2-difluoro-2-(9H-xanthen-9-yl)ethanone (3s).** Yellow solid; 60.8 mg, 82% yield, PE/EA = 30/1 as the eluent; mp = 87–88 °C;  $^1\text{H NMR}$  (400 MHz,  $\text{CDCl}_3$ )  $\delta$  7.56 (s, 1H), 7.51 (d,  $J = 7.9$  Hz, 1H), 7.46 (d,  $J = 8.1$  Hz, 1H), 7.34–7.30 (m, 4H), 7.23 (t,  $J = 7.9$  Hz, 1H), 7.15 (d,  $J = 7.3$  Hz, 2H), 7.07 (t,  $J = 7.5$  Hz, 2H), 4.93 (t,  $J = 14.1$  Hz, 1H);  $^{13}\text{C NMR}$  (100 MHz,  $\text{CDCl}_3$ )  $\delta$  190.0 (t,  $J = 29.9$  Hz), 153.4, 134.6, 134.6, 133.9, 130.6, 129.73 (t,  $J = 3.8$  Hz), 129.66, 129.6, 127.8 (t,  $J = 3.8$  Hz), 123.4, 117.9 (t,  $J = 260.4$  Hz), 116.9, 116.0 (t,  $J = 3.4$  Hz), 44.6 (t,  $J = 23.7$  Hz);  $^{19}\text{F NMR}$  (376 MHz,  $\text{CDCl}_3$ )  $\delta$  -103.10 (d,  $J = 14.6$  Hz, 2F); **HRMS (ESI)**  $m/z$  calcd for  $[\text{M} + \text{Na}]^+$   $\text{C}_{21}\text{H}_{13}\text{ClF}_2\text{O}_2\text{Na}$  393.0464, found 393.0470.

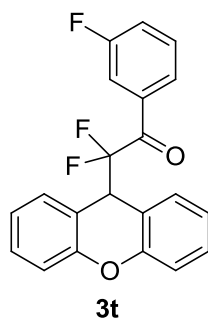

**2,2-Difluoro-1-(3-fluorophenyl)-2-(9H-xanthen-9-yl)ethanone (3t).** Yellow solid; 41.1 mg, 58% yield, PE/EA = 30/1 as the eluent; mp = 49–50 °C;  $^1\text{H NMR}$  (400 MHz,  $\text{CDCl}_3$ )  $\delta$  7.44 (d,  $J = 7.8$  Hz, 1H), 7.34–7.24 (m, 6H), 7.20 (td,  $J = 8.1, 1.6$  Hz, 1H), 7.15 (d,  $J = 8.6$  Hz, 2H), 7.06 (t,  $J = 7.5$  Hz, 2H), 4.93 (t,  $J = 14.1$  Hz, 1H);  $^{13}\text{C NMR}$  (100 MHz,  $\text{CDCl}_3$ )  $\delta$  189.9 (td,  $J = 30.0, 2.3$  Hz), 162.3 (d,  $J = 248.0$  Hz), 153.5, 134.9 (d,  $J = 7.1$  Hz), 130.6, 130.0 (d,  $J = 7.8$  Hz), 129.7, 125.6 (q,  $J = 3.8$  Hz), 123.4, 121.1 (d,  $J = 21.6$  Hz), 118.0 (t,  $J = 260.4$  Hz), 116.9, 116.6 (dt,  $J = 23.5, 3.6$

Hz), 116.1 (t,  $J = 3.2$  Hz), 44.6 (t,  $J = 23.7$  Hz);  $^{19}\text{F}$  NMR (376 MHz,  $\text{CDCl}_3$ )  $\delta$  -103.14 (d,  $J = 14.1$  Hz, 2F), -111.53 – -111.64 (m, 1F); HRMS (ESI)  $m/z$  calcd for  $[\text{M} + \text{Na}]^+ \text{C}_{21}\text{H}_{13}\text{F}_3\text{O}_2\text{Na}$  377.0760, found 377.0766.

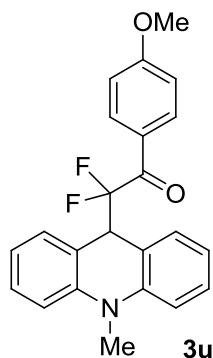

**2,2-Difluoro-1-(4-methoxyphenyl)-2-(10-methyl-9,10-dihydroacridin-9-yl)ethanone (3u).**

Brown solid; 70.5 mg, 93% yield, PE/EA = 30/1 as the eluent; mp = 95–96 °C;  $^1\text{H}$  NMR (400 MHz,  $\text{CDCl}_3$ )  $\delta$  7.46 (d,  $J = 8.7$  Hz, 2H), 7.31 (d,  $J = 7.4$  Hz, 2H), 7.29–7.24 (m, 2H), 6.98 (t,  $J = 6.9$  Hz, 2H), 6.78 (d,  $J = 8.2$  Hz, 2H), 6.68 (d,  $J = 9.0$  Hz, 2H), 4.86 (t,  $J = 13.6$  Hz, 1H), 3.81 (s, 3H), 3.06 (s, 3H);  $^{13}\text{C}$  NMR (100 MHz,  $\text{CDCl}_3$ )  $\delta$  187.5 (t,  $J = 27.2$  Hz), 163.6, 143.3, 132.2 (t,  $J = 4.1$  Hz), 130.5, 128.8, 126.5, 120.7, 118.9 (t,  $J = 258.0$  Hz), 117.9 (t,  $J = 3.5$  Hz), 113.2, 112.6, 55.4, 49.7 (t,  $J = 24.8$  Hz), 32.8;  $^{19}\text{F}$  NMR (376 MHz,  $\text{CDCl}_3$ )  $\delta$  -102.61 (d,  $J = 14.0$  Hz, 2F); HRMS (ESI)  $m/z$  calcd for  $[\text{M} + \text{Na}]^+ \text{C}_{23}\text{H}_{19}\text{F}_2\text{NO}_2\text{Na}$  402.1276, found 402.1278.

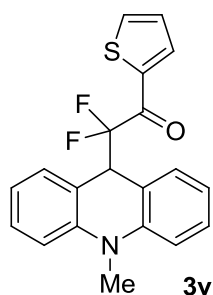

**2,2-Difluoro-2-(10-methyl-9,10-dihydroacridin-9-yl)-1-(thiophen-2-yl)ethanone (3v).**

Brown oil; 63.2 mg, 89% yield, PE/EA = 30/1 as the eluent;  $^1\text{H}$  NMR (400 MHz,  $\text{CDCl}_3$ )  $\delta$  7.56 (d,  $J = 5.0$  Hz, 1H), 7.34 (d,  $J = 7.5$  Hz, 2H), 7.26 (t,  $J = 7.8$  Hz, 2H), 6.99 (t,  $J = 6.9$  Hz, 2H), 6.92 (d,  $J =$

= 2.4 Hz, 1H), 6.82 (dd,  $J = 4.9, 3.9$  Hz, 1H), 6.78 (d,  $J = 8.3$  Hz, 2H), 4.82 (t,  $J = 13.1$  Hz, 1H), 3.08 (s, 3H);  $^{13}\text{C}$  NMR (100 MHz,  $\text{CDCl}_3$ )  $\delta$  181.6 (t,  $J = 30.0$  Hz), 143.2, 140.2, 135.20 (t,  $J = 5.9$  Hz), 135.18, 130.5, 128.9, 128.3, 120.8, 118.1 (t,  $J = 257.4$  Hz), 117.7 (t,  $J = 3.5$  Hz), 112.6, 50.0 (t,  $J = 24.9$  Hz), 32.8;  $^{19}\text{F}$  NMR (376 MHz,  $\text{CDCl}_3$ )  $\delta$  -104.51 (d,  $J = 12.8$  Hz, 2F); HRMS (ESI)  $m/z$  calcd for  $[\text{M} + \text{Na}]^+ \text{C}_{20}\text{H}_{15}\text{F}_2\text{NOSNa}$  378.0735, found 378.0744.

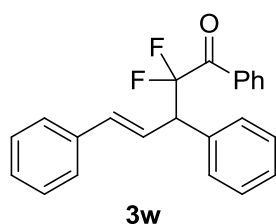

**(E)-2,2-Difluoro-1,3,5-triphenylpent-4-en-1-one (3w).** White solid; 29.8 mg, 43% yield, PE/EA = 30/1 as the eluent; mp = 86–87 °C;  $^1\text{H}$  NMR (400 MHz,  $\text{CDCl}_3$ )  $\delta$  7.98 – 7.94 (m, 2H), 7.62 – 7.58 (m, 1H), 7.45 (t,  $J = 7.1$  Hz, 2H), 7.39 – 7.28 (m, 9H), 7.26 – 7.23 (m, 1H), 6.55 (s, 2H), 4.49 (t,  $J = 16.2$  Hz, 1H);  $^{13}\text{C}$  NMR (100 MHz,  $\text{CDCl}_3$ )  $\delta$  189.9 (t,  $J = 29.8$  Hz), 136.5, 135.4, 135.3, 134.0, 132.9, 129.8 (d,  $J = 3.4$  Hz), 129.6, 128.6 (t,  $J = 7.6$  Hz), 127.9, 126.5, 123.6 (t,  $J = 3.9$  Hz), 118.7 (t,  $J = 258.9$  Hz), 53.3 (t,  $J = 22.0$  Hz);  $^{19}\text{F}$  NMR (376 MHz,  $\text{CDCl}_3$ )  $\delta$  -102.53 (dd,  $J = 275.3, 16.9$  Hz, 1F), -103.38 (dd,  $J = 275.3, 16.7$  Hz, 1F); HRMS (ESI)  $m/z$   $[\text{M} + \text{Na}]^+$  calcd for  $\text{C}_{23}\text{H}_{18}\text{F}_2\text{ONa}$  371.1223, found 371.1216. Physical and spectral properties of this material were identical to those previously reported in literature.<sup>7</sup>

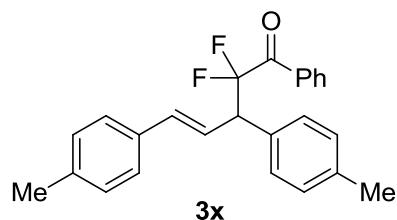

**(E)-2,2-Difluoro-1-phenyl-3,5-di-*p*-tolylpent-4-en-1-one (3x).** White solid; 42.1 mg, 56% yield,

PE/EA = 30/1 as the eluent; mp = 94–95 °C;  $^1\text{H NMR}$  (400 MHz,  $\text{CDCl}_3$ )  $\delta$  7.95 (d,  $J = 7.9$  Hz, 2H), 7.57 (t,  $J = 7.4$  Hz, 1H), 7.42 (t,  $J = 7.8$  Hz, 2H), 7.26 – 7.21 (m, 4H), 7.12 (d,  $J = 7.9$  Hz, 2H), 7.08 (d,  $J = 7.9$  Hz, 2H), 6.50 – 6.41 (m, 2H), 4.45 – 4.36 (m, 1H), 2.30 (s, 6H);  $^{13}\text{C NMR}$  (100 MHz,  $\text{CDCl}_3$ )  $\delta$  190.1 (t,  $J = 29.7$  Hz), 137.8, 137.6, 135.0, 134.0, 133.9, 133.0, 132.5, 129.9 (t,  $J = 3.4$  Hz), 129.5, 129.4, 129.3, 128.6, 126.5, 122.7 (t,  $J = 4.2$  Hz), 118.8 (t,  $J = 258.6$  Hz), 53.1 (t,  $J = 22.0$  Hz), 21.2 (d,  $J = 10.7$  Hz);  $^{19}\text{F NMR}$  (376 MHz,  $\text{CDCl}_3$ )  $\delta$  -103.19 (d,  $J = 16.2$  Hz, 2F); **HRMS (ESI)**  $m/z$   $[\text{M} + \text{Na}]^+$  calcd for  $\text{C}_{25}\text{H}_{22}\text{F}_2\text{ONa}$  399.1536, found 399.1542. Physical and spectral properties of this material were identical to those previously reported in literature.<sup>7</sup>

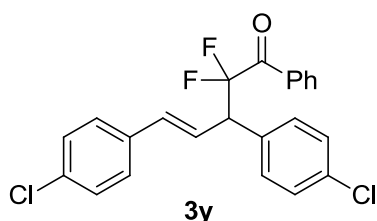

**(E)-3,5-Bis(4-chlorophenyl)-2,2-difluoro-1-phenylpent-4-en-1-one (3y).** White solid; 31.6 mg, 38% yield, PE/EA = 30/1 as the eluent; mp = 116–117 °C;  $^1\text{H NMR}$  (400 MHz,  $\text{CDCl}_3$ )  $\delta$  8.04 (d,  $J = 7.7$  Hz, 2H), 7.62 (dd,  $J = 10.6, 4.3$  Hz, 1H), 7.48 (t,  $J = 7.8$  Hz, 2H), 7.41 – 7.32 (m, 4H), 7.28 (s, 4H), 6.57 – 6.49 (m, 2H), 4.54 (tdd,  $J = 16.0, 4.5, 2.6$  Hz, 1H);  $^{13}\text{C NMR}$  (100 MHz,  $\text{CDCl}_3$ )  $\delta$  189.2 (t,  $J = 29.9$  Hz), 134.7, 134.3, 134.2, 133.8, 133.7, 133.6, 132.5 (d,  $J = 1.7$  Hz), 130.9, 129.8 (t,  $J = 3.3$  Hz), 128.8, 128.6, 127.6, 123.7 (t,  $J = 4.1$  Hz), 118.3 (t,  $J = 259.4$  Hz), 52.4 (t,  $J = 22.1$  Hz);  $^{19}\text{F NMR}$  (376 MHz,  $\text{CDCl}_3$ )  $\delta$  -102.01 (dd,  $J = 278.9, 16.1$  Hz, 1F), -102.84 (dd,  $J = 278.8, 15.6$  Hz, 1F); **HRMS (ESI)**  $m/z$   $[\text{M} + \text{Na}]^+$  calcd for  $\text{C}_{23}\text{H}_{16}\text{Cl}_2\text{F}_2\text{ONa}$  416.0546, found 416.0551. Physical and spectral properties of this material were identical to those previously reported in literature.<sup>7</sup>



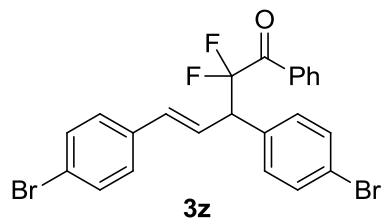

**(E)-3,5-Bis(4-bromophenyl)-2,2-difluoro-1-phenylpent-4-en-1-one (3z).** White solid; 41.5 mg, 41% yield, PE/EA = 30/1 as the eluent; mp = 143–144 °C;  $^1\text{H NMR}$  (400 MHz,  $\text{CDCl}_3$ )  $\delta$  8.01 (d,  $J = 7.6$  Hz, 2H), 7.64 – 7.60 (m, 1H), 7.48 (t,  $J = 8.1$  Hz, 4H), 7.44 – 7.41 (m, 2H), 7.29 (d,  $J = 8.4$  Hz, 2H), 7.23 – 7.19 (m, 2H), 6.55 – 6.45 (m, 2H), 4.50 (td,  $J = 16.1, 6.5$  Hz, 1H);  $^{13}\text{C NMR}$  (100 MHz,  $\text{CDCl}_3$ )  $\delta$  189.4 (t,  $J = 30.0$  Hz), 135.3, 134.5, 134.4, 134.3 (t,  $J = 2.1$  Hz), 132.6, 131.9, 131.8, 131.4, 130.0 (t,  $J = 3.3$  Hz), 128.8, 128.1, 124.0 (t,  $J = 4.2$  Hz), 122.2, 122.0, 118.4 (t,  $J = 259.5$  Hz), 52.6 (t,  $J = 22.1$  Hz);  $^{19}\text{F NMR}$  (376 MHz,  $\text{CDCl}_3$ )  $\delta$  -102.01 (dd,  $J = 279.7, 16.4$  Hz, 1F), -102.81 (dd,  $J = 280.0, 16.2$  Hz, 1F); **HRMS (ESI)**  $m/z$   $[\text{M} + \text{Na}]^+$  calcd for  $\text{C}_{23}\text{H}_{16}\text{Br}_2\text{F}_2\text{ONa}$  528.9413, found 528.9420. Physical and spectral properties of this material were identical to those previously reported in literature.<sup>7</sup>

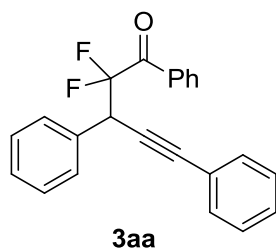

**2,2-Difluoro-1,3-diphenylpent-4-yn-1-one (3aa):** Yellow oil; 33.2 mg, 48% yield, PE/EA = 30/1 as the eluent;  $^1\text{H NMR}$  (400 MHz,  $\text{CDCl}_3$ )  $\delta$  8.04 (d,  $J = 7.7$  Hz, 2H), 7.57 (dd,  $J = 14.0, 6.8$  Hz, 3H), 7.44 (t,  $J = 7.8$  Hz, 2H), 7.43 – 7.37 (m, 5H), 7.32 – 7.26 (m, 3H), 4.89 (dd,  $J = 18.3, 10.4$  Hz, 1H);  $^{13}\text{C NMR}$  (100 MHz,  $\text{CDCl}_3$ )  $\delta$  189.6 (dd,  $J = 30.2, 28.6$  Hz), 134.2, 133.1, 132.9 (t,  $J = 1.7$  Hz), 132.4 (d,  $J = 1.9$  Hz), 131.7, 130.1, 130.0 (dd,  $J = 3.9, 3.2$  Hz), 122.4, 116.9 (dd,  $J = 263.3, 259.9$  Hz), 86.2, 83.4 (dd,  $J = 9.4, 2.2$  Hz), 43.6 (dd,  $J = 27.4, 23.1$  Hz);  $^{19}\text{F NMR}$  (376 MHz,

$\text{CDCl}_3$ )  $\delta$  -100.50 (dd,  $J = 267.7, 11.7$  Hz, 1F), -105.72 (dd,  $J = 267.8, 20.0$  Hz, 1F); **HRMS (ESI)**  $m/z$   $[\text{M} + \text{Na}]^+$  calcd for  $\text{C}_{23}\text{H}_{16}\text{F}_2\text{ONa}$  369.1067, found 369.1061. Physical and spectral properties of this material were identical to those previously reported in literature.<sup>7</sup>

#### Procedure for preparation of compound 4.

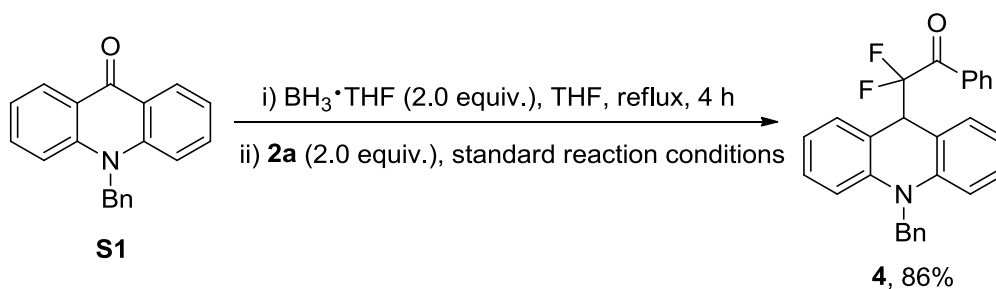

To a slurry of *N*-benzylacridine-9(10*H*)-one **SI** (142.5 mg, 0.5 mmol, 1.0 equiv) in THF (2 mL)  $\text{BH}_3 \cdot \text{THF}$  solution (1.0 M in THF; 1 mL, 1.0 mmol, 2.0 equiv) was added dropwise and the mixture was refluxed for 4 hours under Ar-atmosphere. Then the mixture was cooled to 0-5 °C and cautiously quenched by the addition of brine (5 mL) followed by 2 M aq. NaOH (1 mL). The organic layer was separated, and the aqueous layer was extracted with  $\text{Et}_2\text{O}$  (1 × 10 mL). The collected organic layers were dried over  $\text{MgSO}_4$  and evaporated.<sup>3</sup>

The obtained 10-benzyl-9,10-dihydroacridine without any further purification was transferred to a vial equipped with a magnetic stirring bar with HFIP (5.0 mL). **2a** (237 mg, 1.0 mmol, 2.0 equiv) and  $\text{Na}_2$ -eosin Y (34.5 mg, 0.05 mmol, 10 mol%) were added to the vial. The mixture was exposed to green LED (1.5 W) and stirred at room temperature under air for 6 h. Then the mixture was concentrated in vacuo, and purified by column chromatography on silica gel (PE/EA, 30:1) to afford the desired products **4** (182.8 mg, 86% yield) as a brown solid.

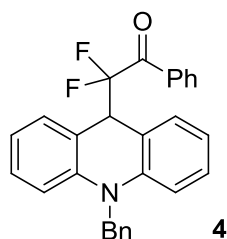

**2-(10-Benzyl-9,10-dihydroacridin-9-yl)-2,2-difluoro-1-phenylethanone (4)**. Brown solid; 182.8 mg, 86% yield, PE/EA = 30/1 as the eluent; mp = 119–120 °C;  $^1\text{H NMR}$  (400 MHz,  $\text{CDCl}_3$ )  $\delta$  7.50–7.43 (m, 3H), 7.33 (d,  $J$  = 6.8 Hz, 2H), 7.30–7.23 (m, 5H), 7.12 (t,  $J$  = 7.0 Hz, 2H), 7.07 (d,  $J$  = 6.6 Hz, 2H), 6.95 (t,  $J$  = 6.9 Hz, 2H), 6.62 (d,  $J$  = 8.3 Hz, 2H), 4.96 (t,  $J$  = 13.7 Hz, 1H), 4.76 (s, 2H);  $^{13}\text{C NMR}$  (100 MHz,  $\text{CDCl}_3$ )  $\delta$  190.0 (t,  $J$  = 28.0 Hz), 142.3, 136.5, 133.50, 133.45, 130.7, 129.7 (t,  $J$  = 3.7 Hz), 129.0, 128.8, 128.1, 127.0, 125.9, 121.0, 118.7 (t,  $J$  = 260.1 Hz), 117.1 (t,  $J$  = 3.0 Hz), 113.8, 50.9, 49.1 (t,  $J$  = 24.0 Hz);  $^{19}\text{F NMR}$  (376 MHz,  $\text{CDCl}_3$ )  $\delta$  -103.40 (d,  $J$  = 13.3 Hz, 2F); **HRMS (ESI)**  $m/z$  calcd for  $[\text{M} + \text{Na}]^+$   $\text{C}_{28}\text{H}_{21}\text{F}_2\text{NONa}$  448.1483, found 448.1494.

**Procedure for preparation of compound 5.**

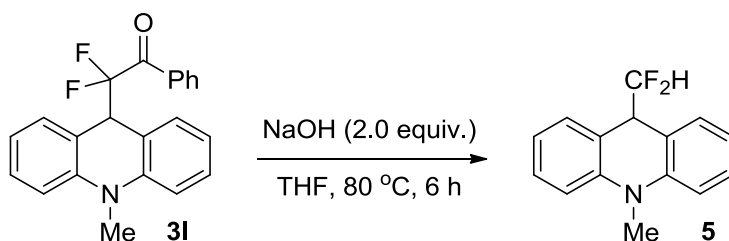

Compound **3I** (69.8 mg, 0.2 mmol, 1.0 equiv), NaOH (16 mg, 0.4 mmol, 2.0 equiv) and THF (2.0 mL) were added to a sealed tube. After the reaction was stirred at 80 °C for 6 h, the resulting mixture was cooled to room temperature, concentrated in vacuo, and purified by flash column chromatography on silica gel (PE/EA, 50:1) to give product **5** (30.9 mg, 63% yield) as a green solid.<sup>8</sup>

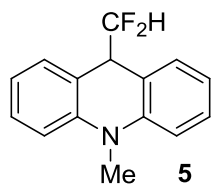

**9-(Difluoromethyl)-10-methyl-9,10-dihydroacridine (5).** Green solid; 30.9 mg, 63% yield, PE/EA = 50/1 as the eluent; mp = 89–90 °C;  $^1\text{H NMR}$  (400 MHz,  $\text{CDCl}_3$ )  $\delta$  7.34–7.24 (m, 4H), 7.05–6.92 (m, 4H), 5.60 (td,  $J = 57.1, 6.0$  Hz, 1H), 4.30 (td,  $J = 12.9, 5.9$  Hz, 1H), 3.39 (s, 3H);  $^{13}\text{C NMR}$  (100 MHz,  $\text{CDCl}_3$ )  $\delta$  142.8, 130.2, 128.6, 120.9, 119.0 (t,  $J = 4.0$  Hz), 115.1 (t,  $J = 245.5$  Hz), 112.4, 48.5 (t,  $J = 13.3$  Hz), 33.0;  $^{19}\text{F NMR}$  (376 MHz,  $\text{CDCl}_3$ )  $\delta$  -120.83 (dd,  $J = 57.0, 13.1$  Hz, 2F); **HRMS (ESI)**  $m/z$  calcd for  $[\text{M} + \text{H}]^+$   $\text{C}_{15}\text{H}_{14}\text{F}_2\text{N}$  246.1089, found 246.1088.

#### Procedure for preparation of compound 6.

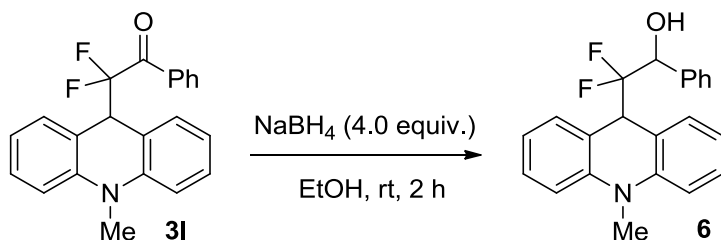

An oven-dried Schlenk tube under an  $\text{N}_2$  atmosphere was charged with compound **3I** (69.8 mg, 0.2 mmol, 1.0 equiv), EtOH (2.0 mL),  $\text{NaBH}_4$  (30.4 mg, 0.8 mmol, 4.0 equiv). After the reaction was stirred at room temperature for 2 h, aqueous solution HCl (1 M, 2.0 mL) was added. The resulting mixture was extracted with ethyl acetate ( $2 \times 10$  mL). The combined organic layers were dried over anhydrous  $\text{Na}_2\text{SO}_4$ , concentrated in vacuo, and purified by silica gel column chromatography (PE/EA, 10:1) to give product **6** (60.4 mg, 86% yield, >20:1 dr) as a white solid.<sup>7</sup>

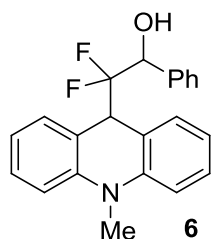

**2,2-Difluoro-2-(10-methyl-9,10-dihydroacridin-9-yl)-1-phenylethanol (6).** White solid; 60.4 mg, 86% yield, PE/EA = 10/1 as the eluent; mp = 174–175 °C;  $^1\text{H NMR}$  (400 MHz,  $\text{CDCl}_3$ )  $\delta$  7.51 (d,  $J = 7.5$  Hz, 1H), 7.35–7.24 (m, 8H), 7.06–6.95 (m, 3H), 6.93 (d,  $J = 8.3$  Hz, 1H), 4.84 (dd,  $J = 24.0, 7.0$  Hz, 1H), 4.68 (d,  $J = 20.9$  Hz, 1H), 3.38 (s, 3H), 2.36 (d,  $J = 5.1$  Hz, 1H);  $^{13}\text{C NMR}$  (100 MHz,  $\text{CDCl}_3$ )  $\delta$  143.5, 136.6, 130.6 (d,  $J = 65.5$  Hz), 128.5, 128.4, 128.1, 128.0, 121.9 (dd,  $J = 256.0, 251.3$  Hz), 120.5 (d,  $J = 10.2$  Hz), 118.8 (dd,  $J = 59.1, 6.1$  Hz), 112.6 (d,  $J = 30.4$  Hz), 72.1 (dd,  $J = 33.4, 24.0$  Hz), 47.2 (t,  $J = 24.9$  Hz), 33.1;  $^{19}\text{F NMR}$  (376 MHz,  $\text{CDCl}_3$ )  $\delta$  -112.76 (dd,  $J = 252.2, 24.0$  Hz, 1F), -117.68 (ddd,  $J = 252.1, 21.0, 7.0$  Hz, 1F); **HRMS (ESI)**  $m/z$  calcd for  $[\text{M} + \text{Na}]^+ \text{C}_{22}\text{H}_{19}\text{F}_2\text{NONa}$  374.1327, found 374.1331.

### The singlet oxygen capture experiment with $\alpha$ -terpinene

To a mixture of **1a** (0.2 mmol), **2a** (0.4 mmol, 2.0 equiv) and  $\alpha$ -terpinene (0.6 mmol, 3.0 equiv) in HFIP (2.0 mL) was added  $\text{Na}_2$ -eosin Y (13.8 mg, 0.02 mmol, 10 mol%). The mixture was exposed to green LED (1.5 W) and stirred at room temperature under air for 6 h. As expected, only trace amount of **3a** and **7** were found and the adduct of singlet oxygen ( $^1\text{O}_2$ ) with  $\alpha$ -terpinene **8** is detected by ESI-HRMS.

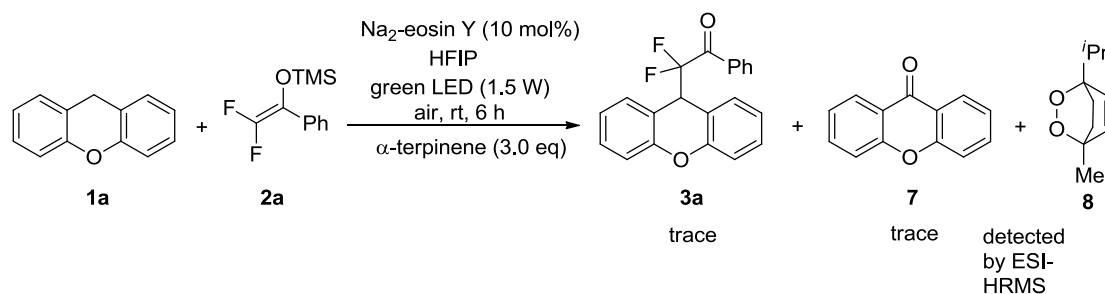

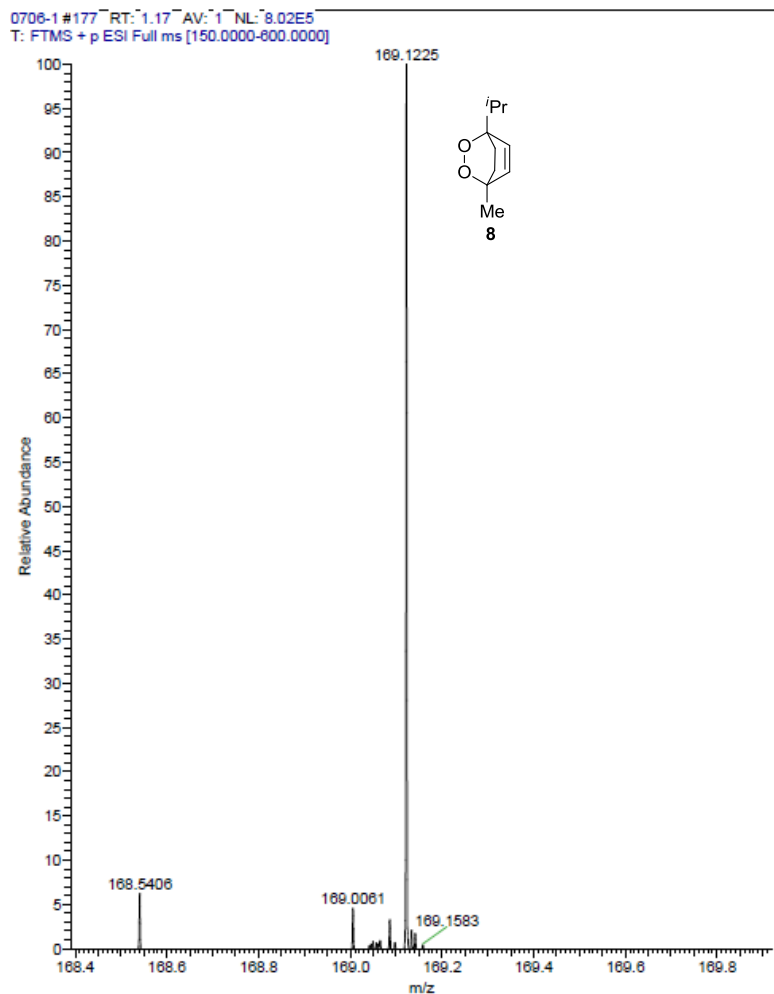

## References

- (a) E. Böb, T. Hillringhaus, J. Nitsch and M. Klussmann, Lewis acid-catalysed one pot synthesis of substituted xanthenes, *Org. Biomol. Chem.*, 2011, **9**, 1744–1748; (b) K. Zhou, Y. Yu, Y.-M. Lin, Y. Li and L. Gong, Copper-catalyzed aerobic asymmetric cross-dehydrogenative coupling of C(sp<sup>3</sup>)–H bonds driven by visible light, *Green Chem.*, 2020, **22**, 4597–4603; (c) J. Zhou, T. Li, M. Li, C. Li, X. Hu, L. Jin, N. Sun, B. Hu and Z. Shen, FeCl<sub>2</sub>-Catalyzed direct C<sub>2</sub>-benzylation of benzofurans with diarylmethanes via cross dehydrogenative coupling, *Asian J. Org. Chem.*, 2021, **10**, 549–553.
- E. Larionov, M. M. Mastandrea and M. A. Pericás, Asymmetric visible-light photoredox cross-dehydrogenative coupling of aldehydes with xanthenes, *ACS Catal.*, 2017, **7**, 7008–7013.
- Á. Pintó, A. Sud, D. Sureshkumar and M. Klussmann, Autoxidative carbon-carbon bond formation from carbon-hydrogen bonds, *Angew. Chem., Int. Ed.*, 2010, **49**, 5004–5007.

4. D. Sarma, B. Majumdar and T. K. Sarma, Visible-light induced enhancement in the multicatalytic activity of sulfated carbon dots for aerobic carbon–carbon bond formation, *Green Chem.*, 2019, **21**, 6717–6726.
5. D.-P. Chen, L.-J. Wu, H.-W. L, X.-L. Xu and J.-Z. Yan, CDC Reaction and Subsequent Cyclization for the Synthesis of 2-Hydroxy-3-alkyl-1,4-naphthoquinones and Pyranonaphthoquinones, *J. Org. Chem.*, 2017, **82**, 1610–1617.
6. H. Amii, T. Kobayashi, Y. Hatamoto and K. Uneyama, Mg<sup>0</sup>-promoted selective C–F bond cleavage of trifluoromethyl ketones: a convenient method for the synthesis of 2,2-difluoro enol silanes, *Chem. Commun.*, 1999, 1323–1324.
7. J. Li, W. Xi, R. Zhong, J. Yang, L. Wang, H. Ding and Z. Wang, HFIP-catalyzed direct dehydroxydifluoroalkylation of benzylic and allylic alcohols with difluoroenoxy silanes, *Chem. Commun.*, 2021, **57**, 1050–1053.
8. H. Song, R. Cheng, Q.-Q. Min and X. Zhang, Decarboxylative and deaminative alkylation of difluoroenoxy silanes via photoredox catalysis: a general method for site-selective synthesis of difluoroalkylated alkanes, *Org. Lett.*, 2020, **22**, 7747–7751.

# Copies of $^1\text{H}$ , $^{13}\text{C}$ and $^{19}\text{F}$ NMR spectra

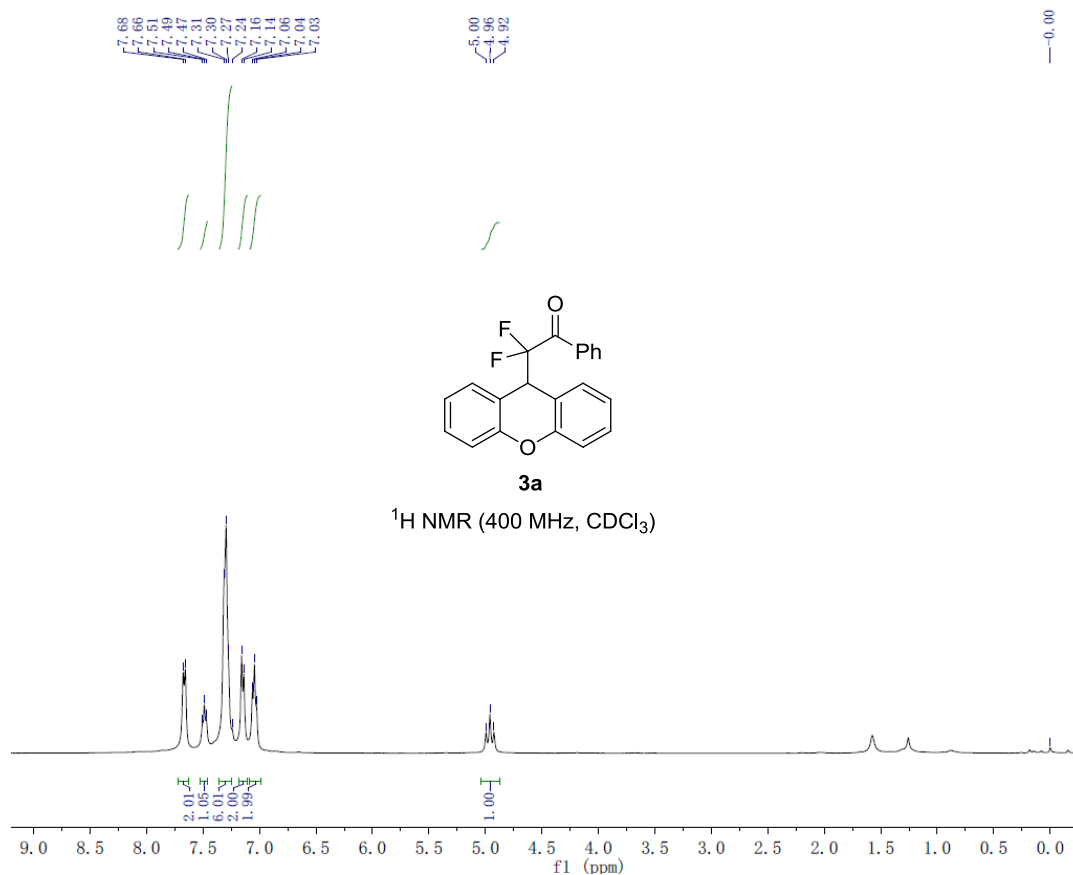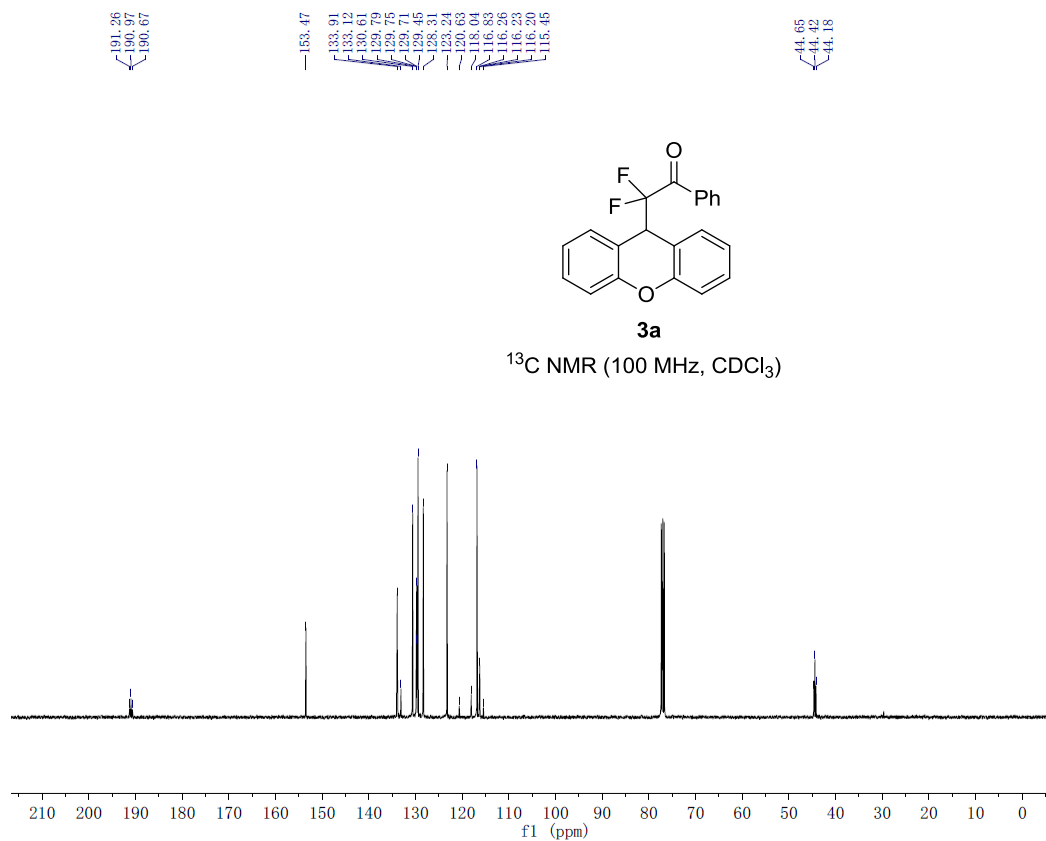



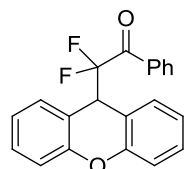

**3a**

$^{19}\text{F}$  NMR (376 MHz,  $\text{CDCl}_3$ )

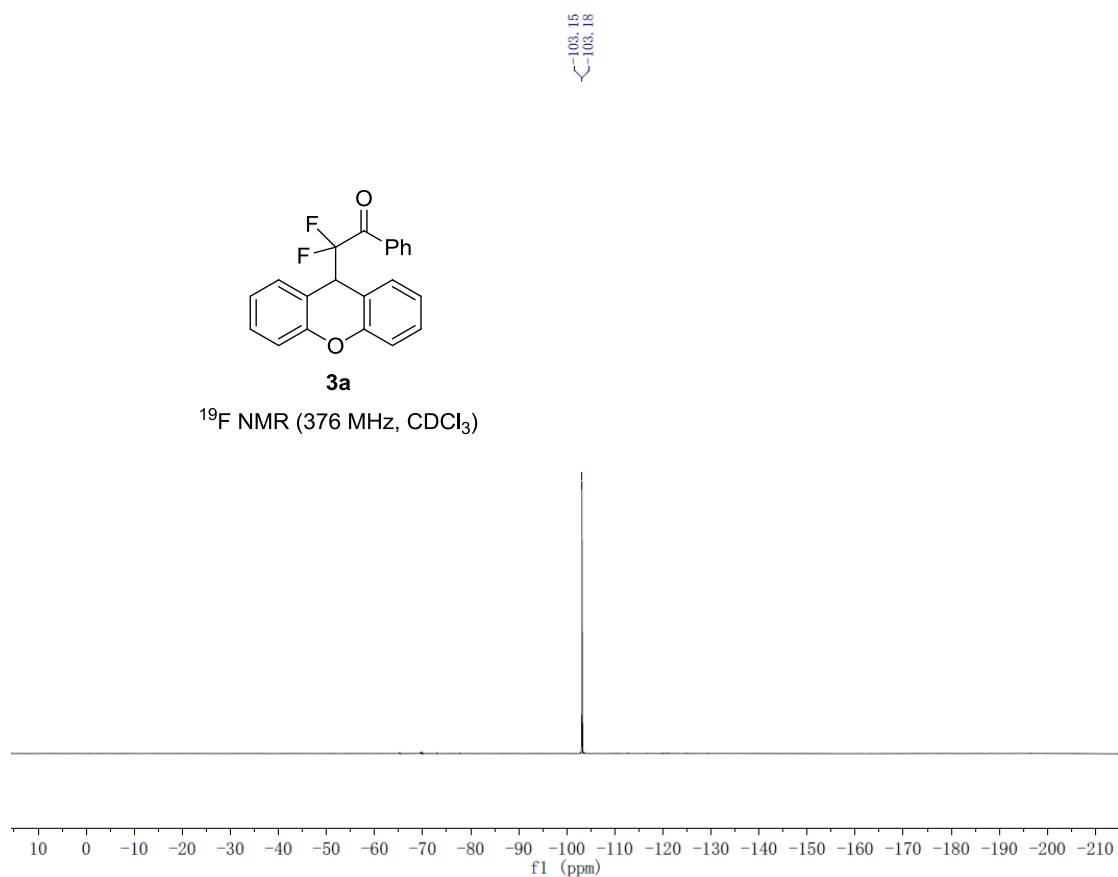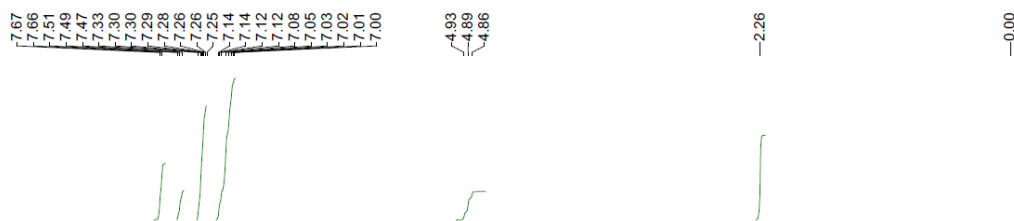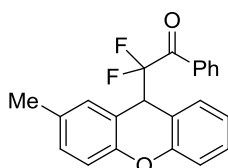

**3b**

$^1\text{H}$  NMR (400 MHz,  $\text{CDCl}_3$ )

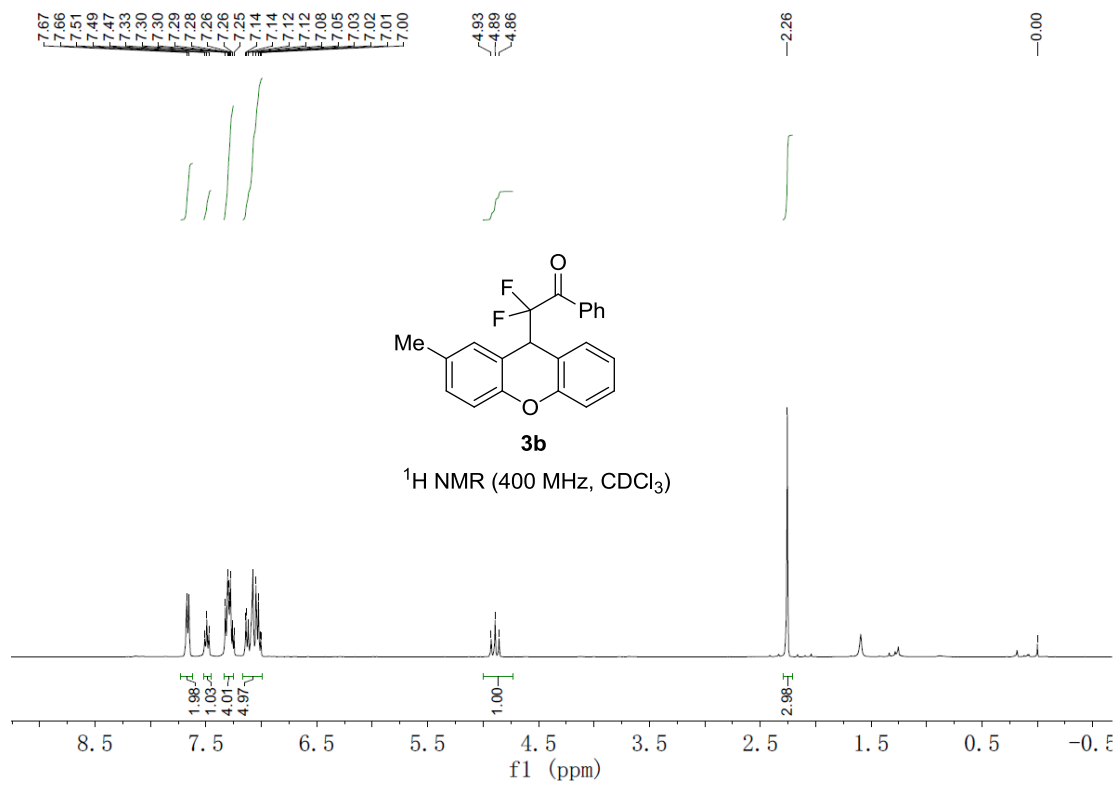

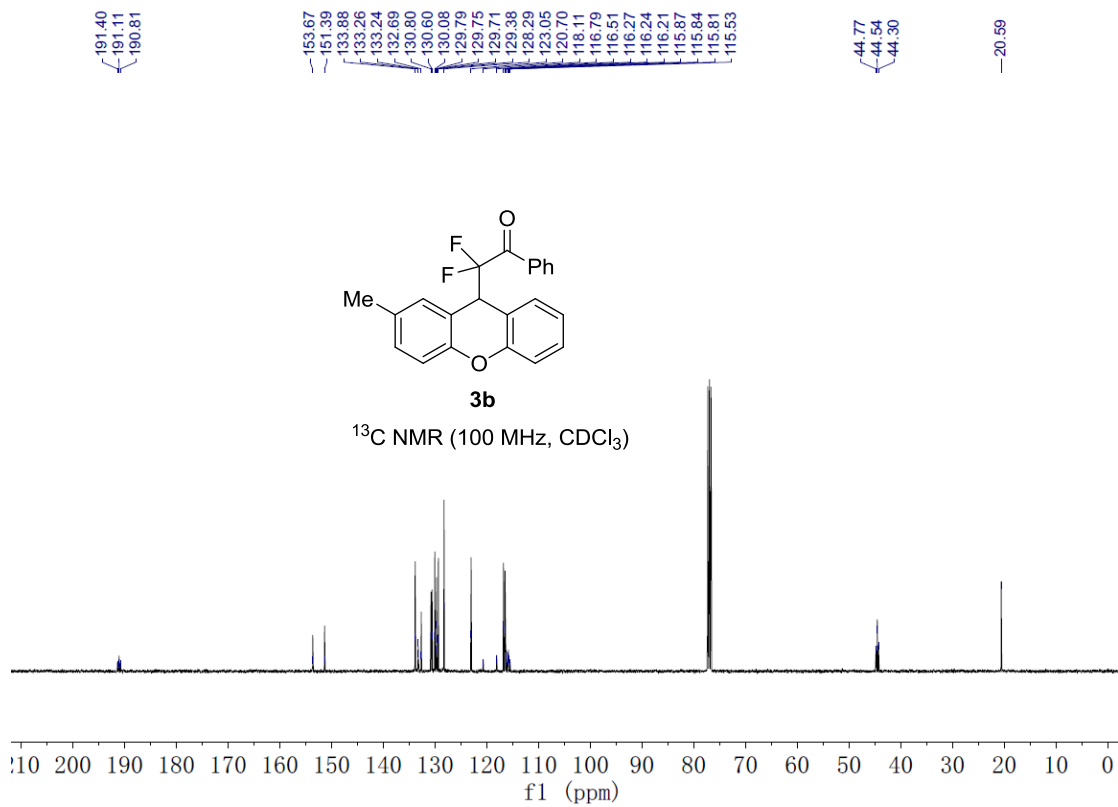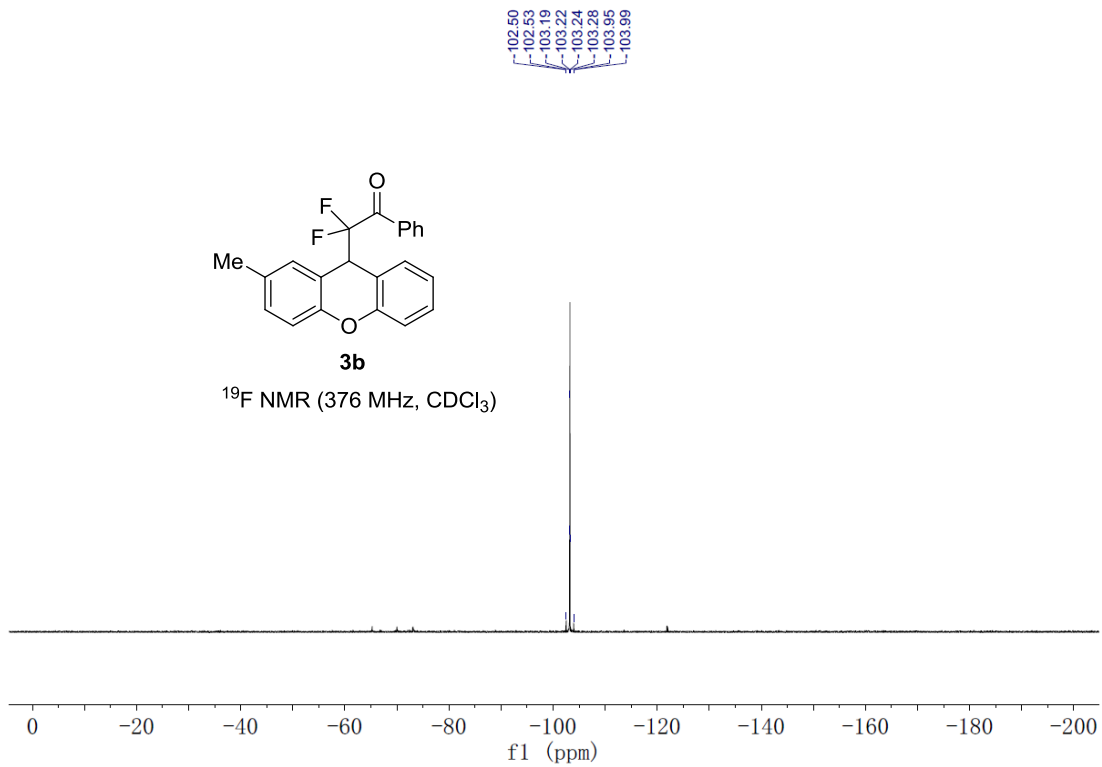

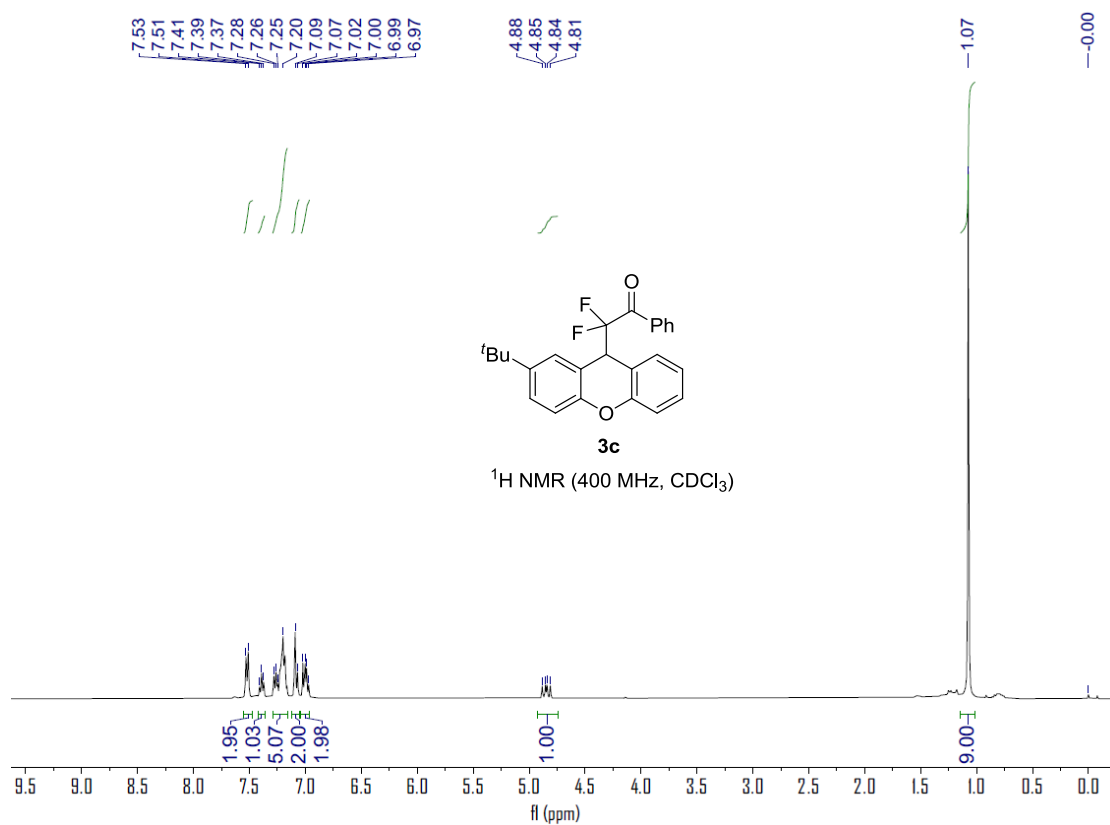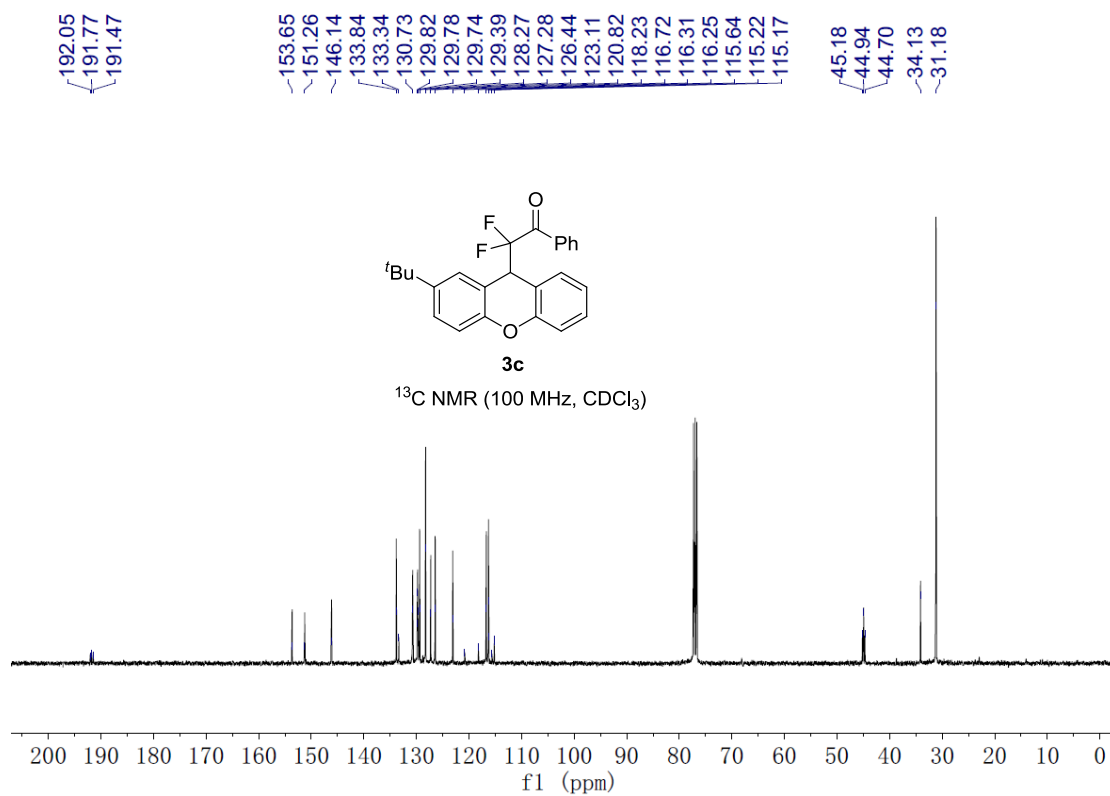

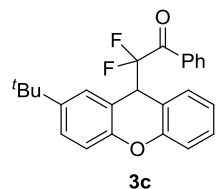

$^{19}\text{F}$  NMR (376 MHz,  $\text{CDCl}_3$ )

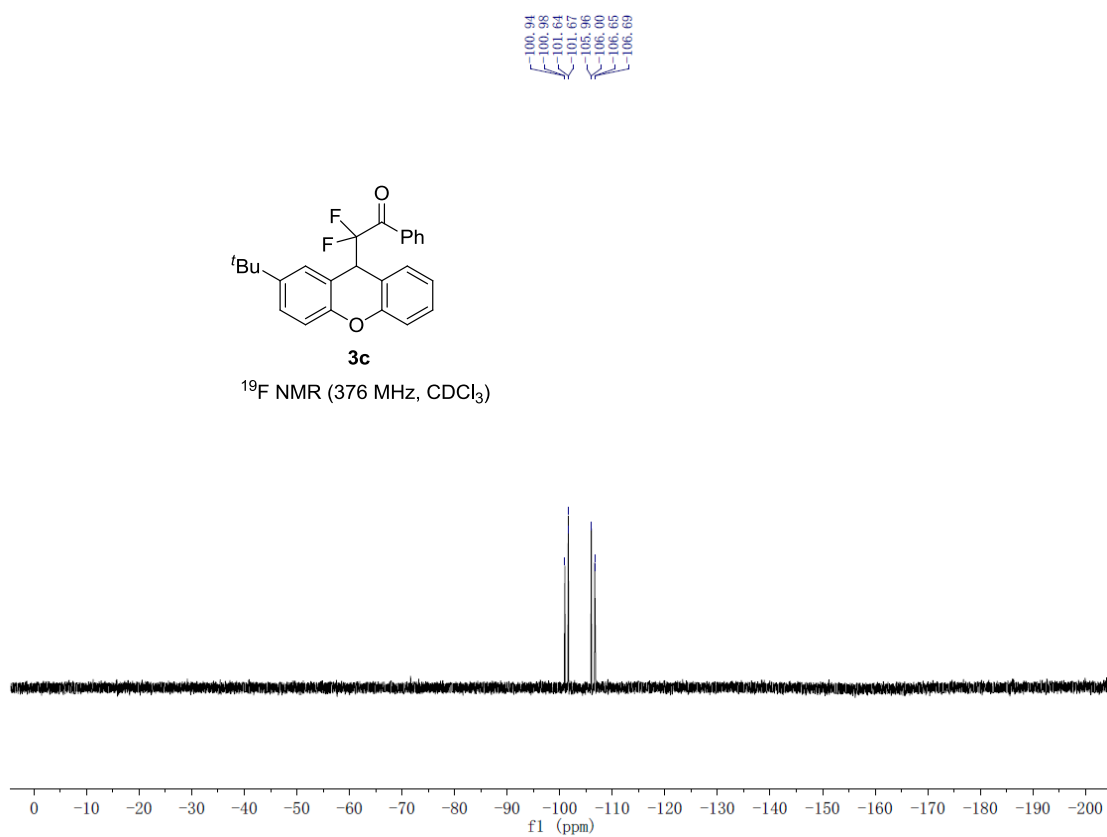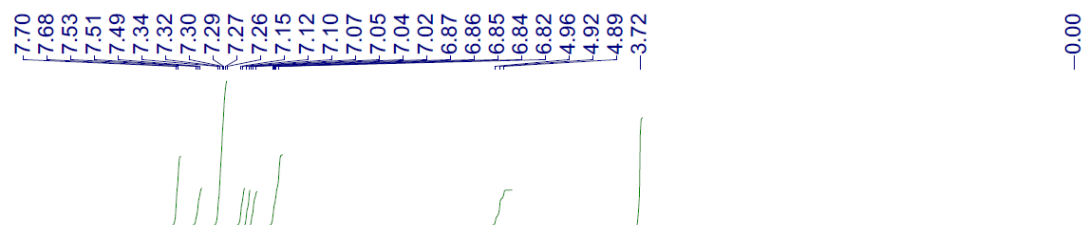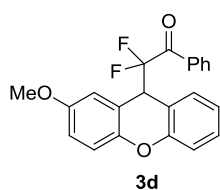

$^1\text{H}$  NMR (400 MHz,  $\text{CDCl}_3$ )

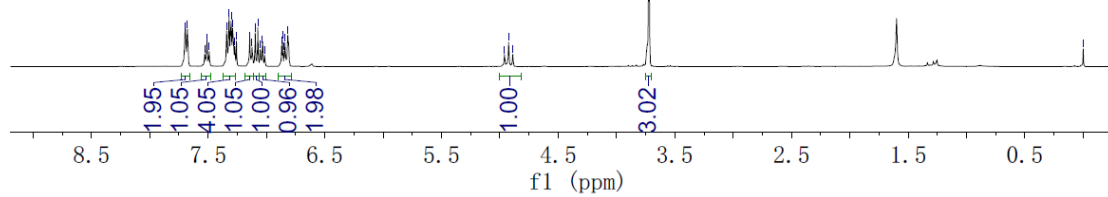

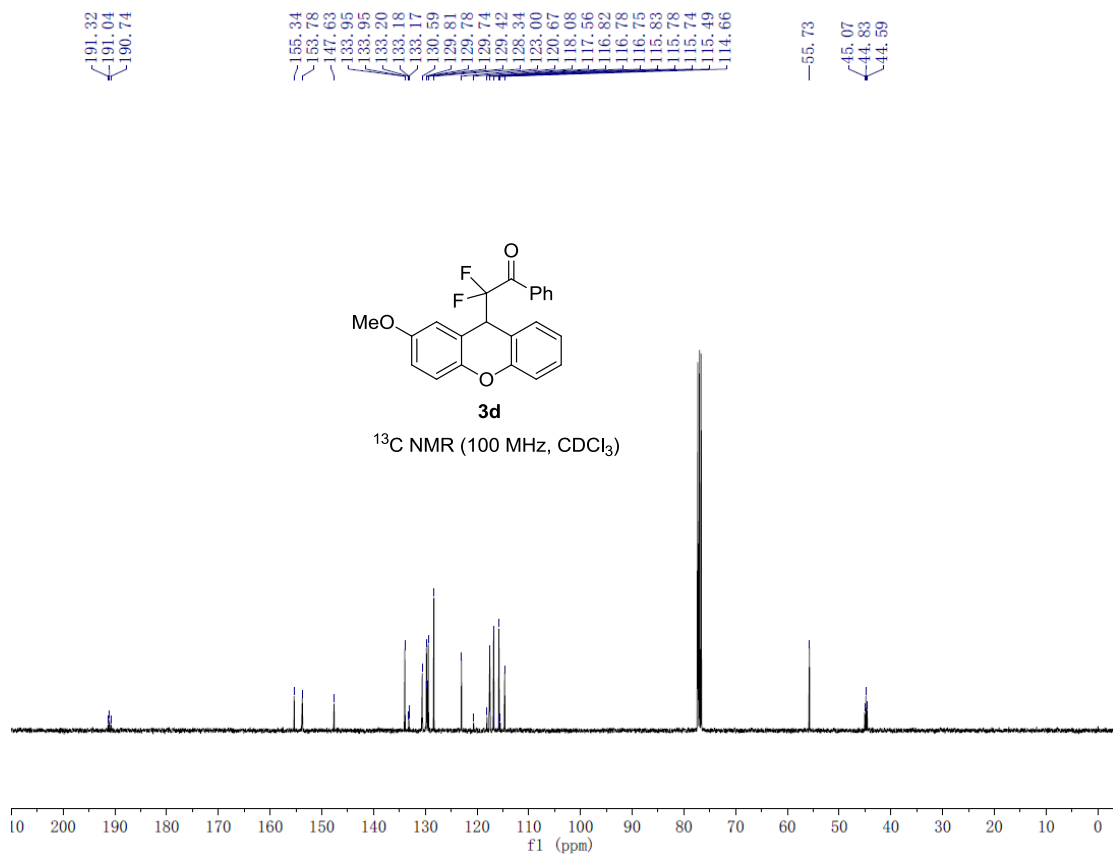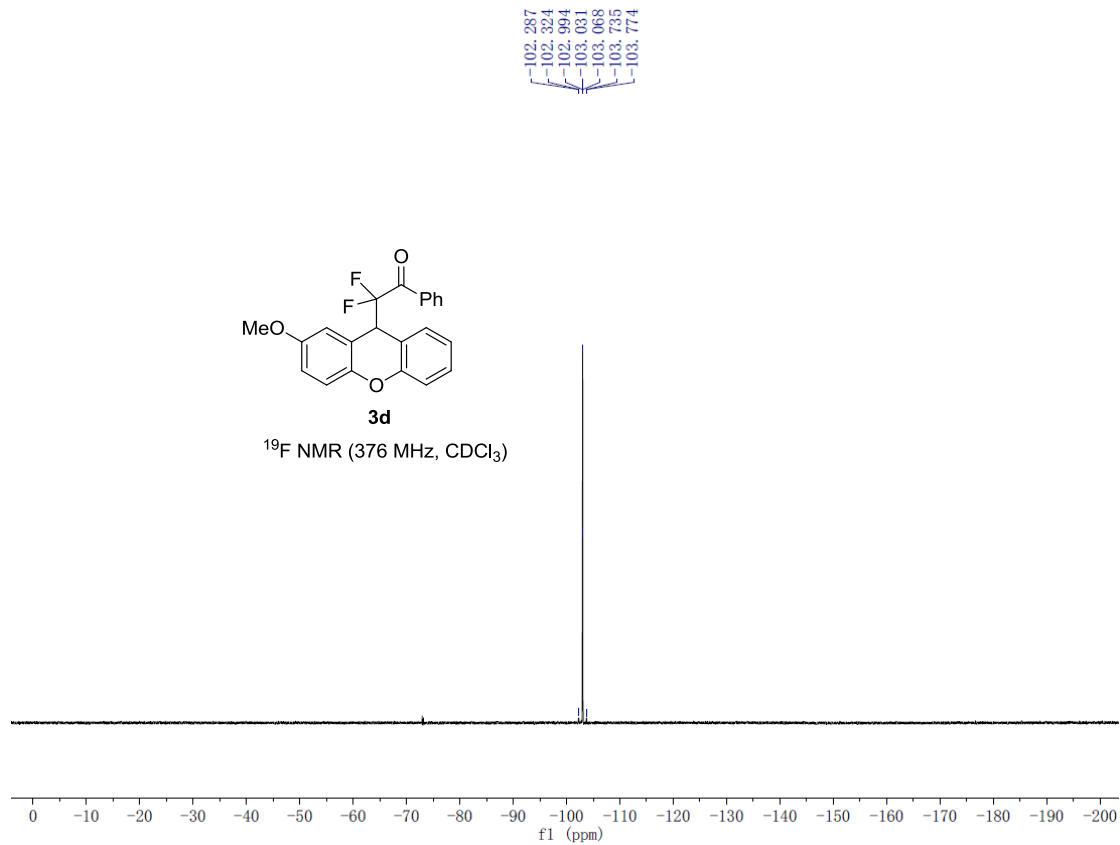

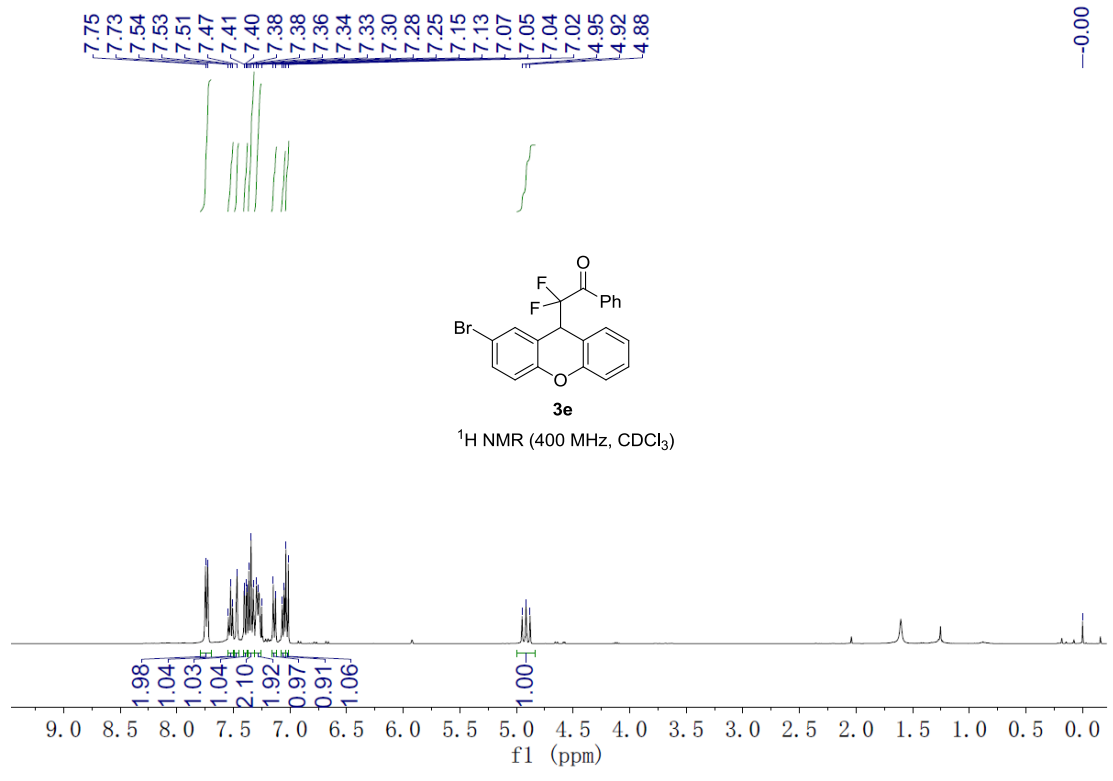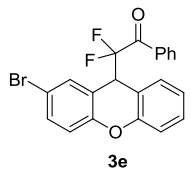

<sup>1</sup>H NMR (400 MHz, CDCl<sub>3</sub>)

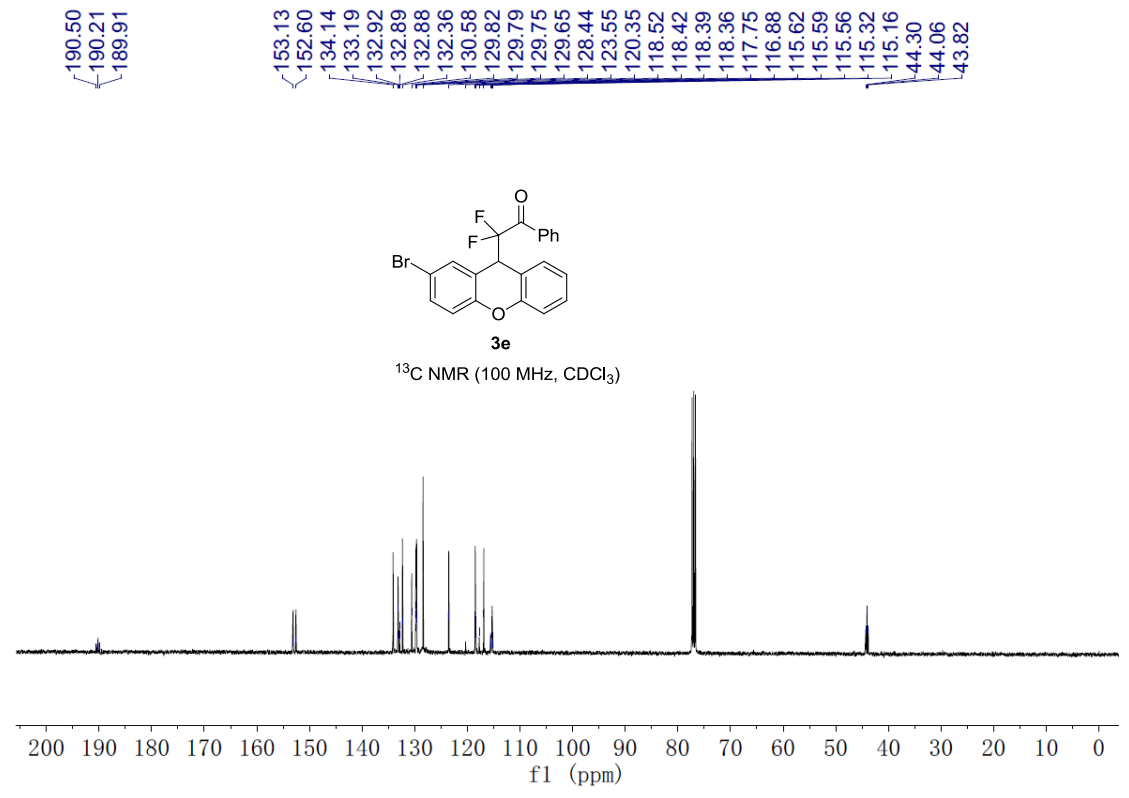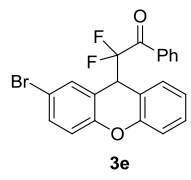

<sup>13</sup>C NMR (100 MHz, CDCl<sub>3</sub>)

101.44  
101.48  
102.17  
102.20  
103.35  
104.07  
104.11

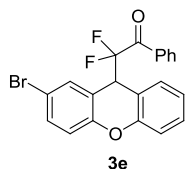

<sup>19</sup>F NMR (376 MHz, CDCl<sub>3</sub>)

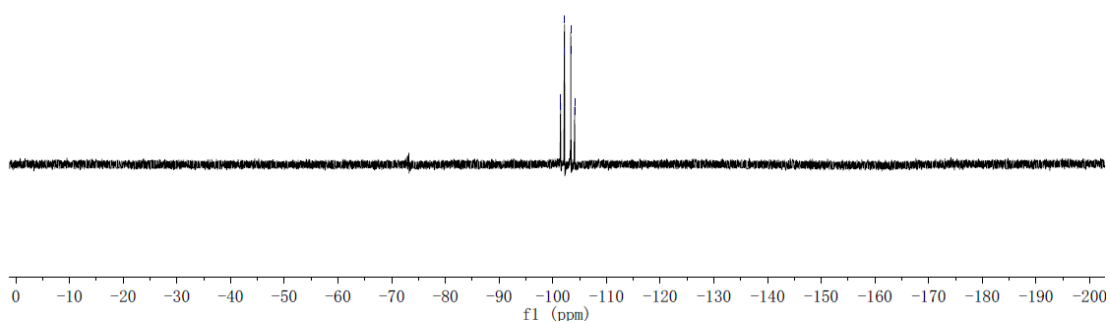

7.74  
7.72  
7.54  
7.53  
7.51  
7.36  
7.34  
7.32  
7.30  
7.28  
7.26  
7.15  
7.13  
7.11  
7.10  
7.09  
7.08  
7.07  
7.06  
7.03  
7.01  
6.99  
6.98  
4.98  
4.95  
4.91

—0.00

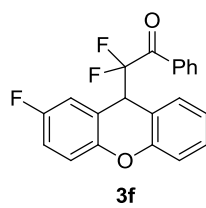

<sup>1</sup>H NMR (400 MHz, CDCl<sub>3</sub>)

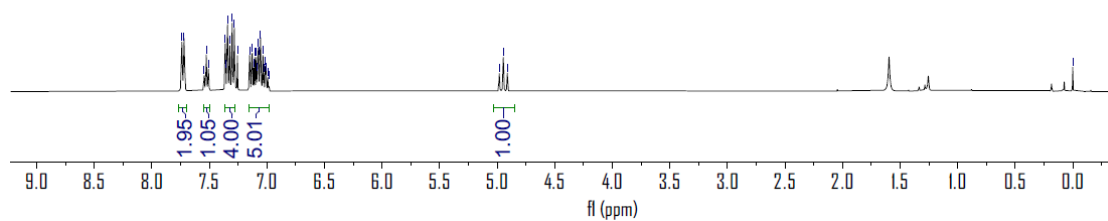

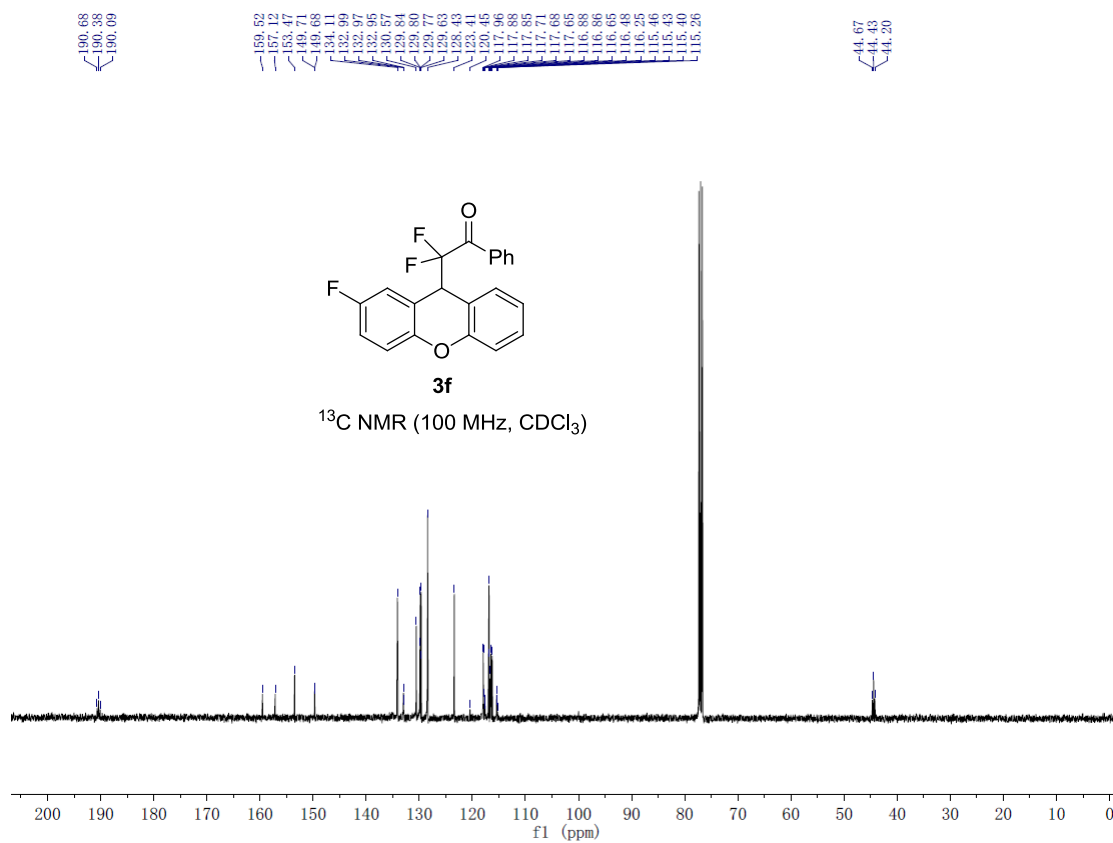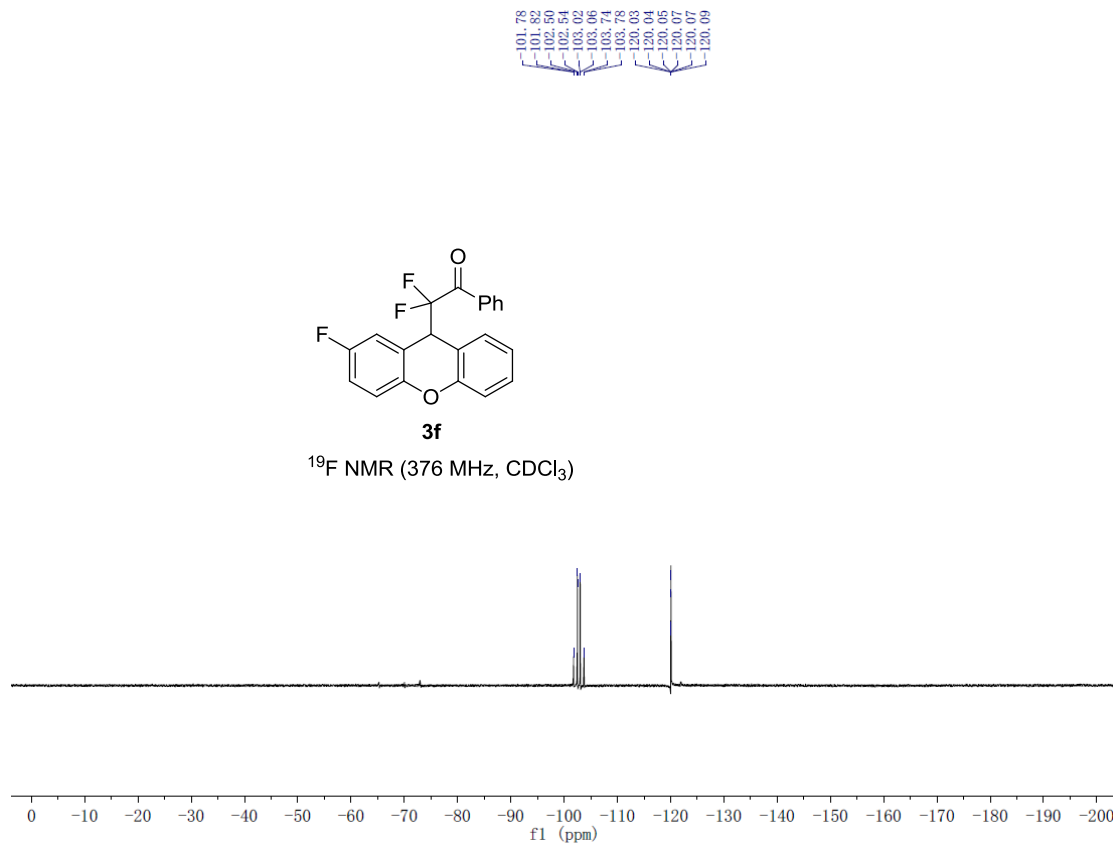



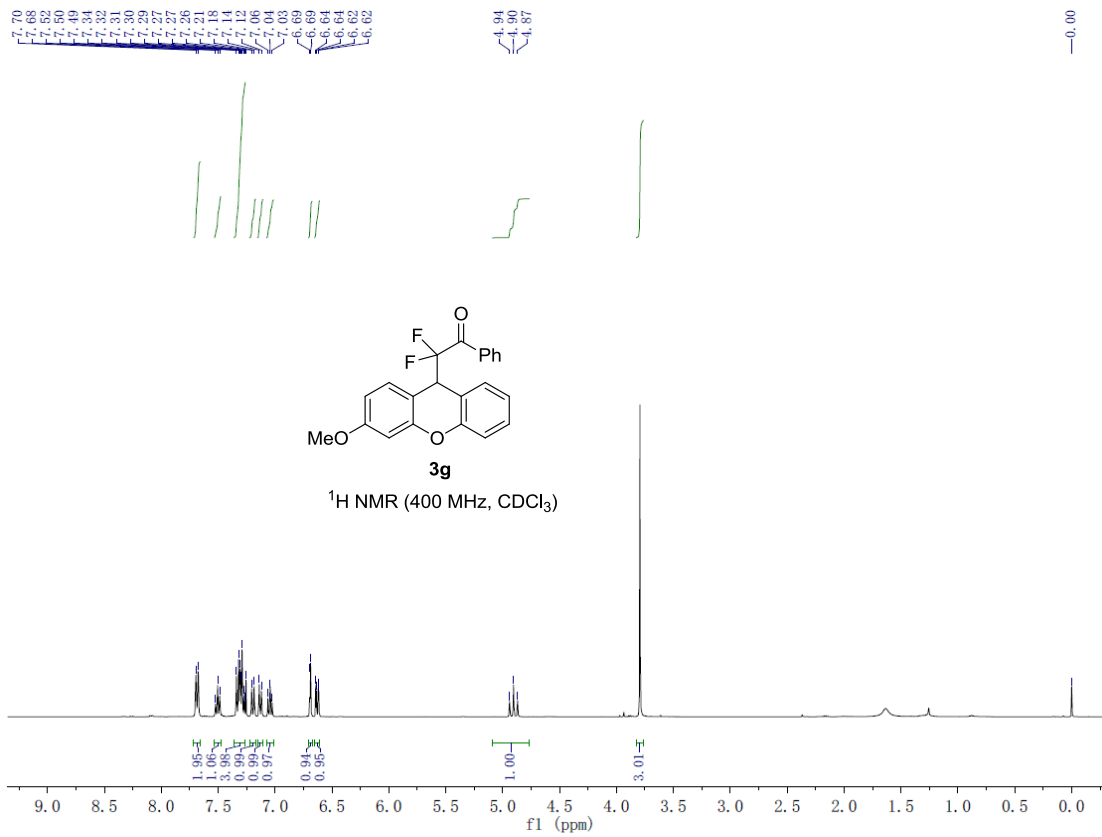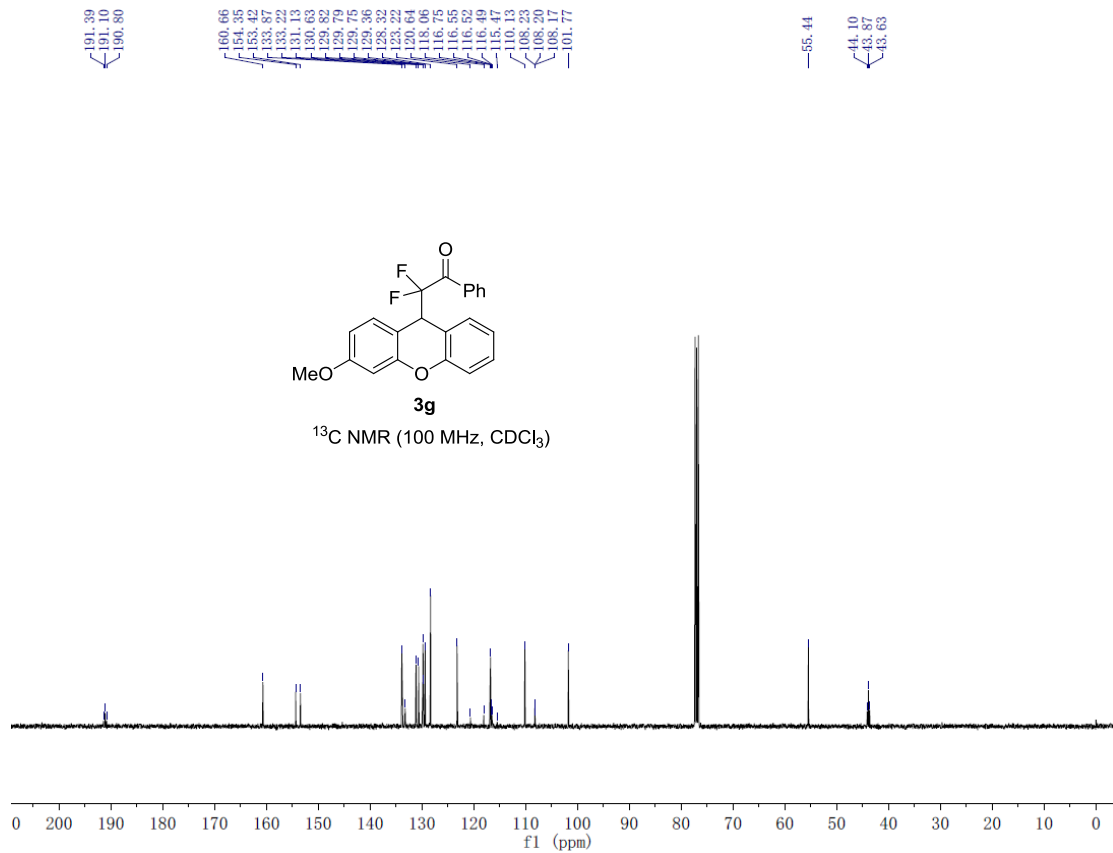

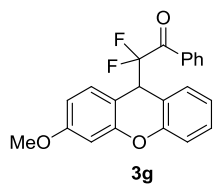

<sup>19</sup>F NMR (376 MHz, CDCl<sub>3</sub>)

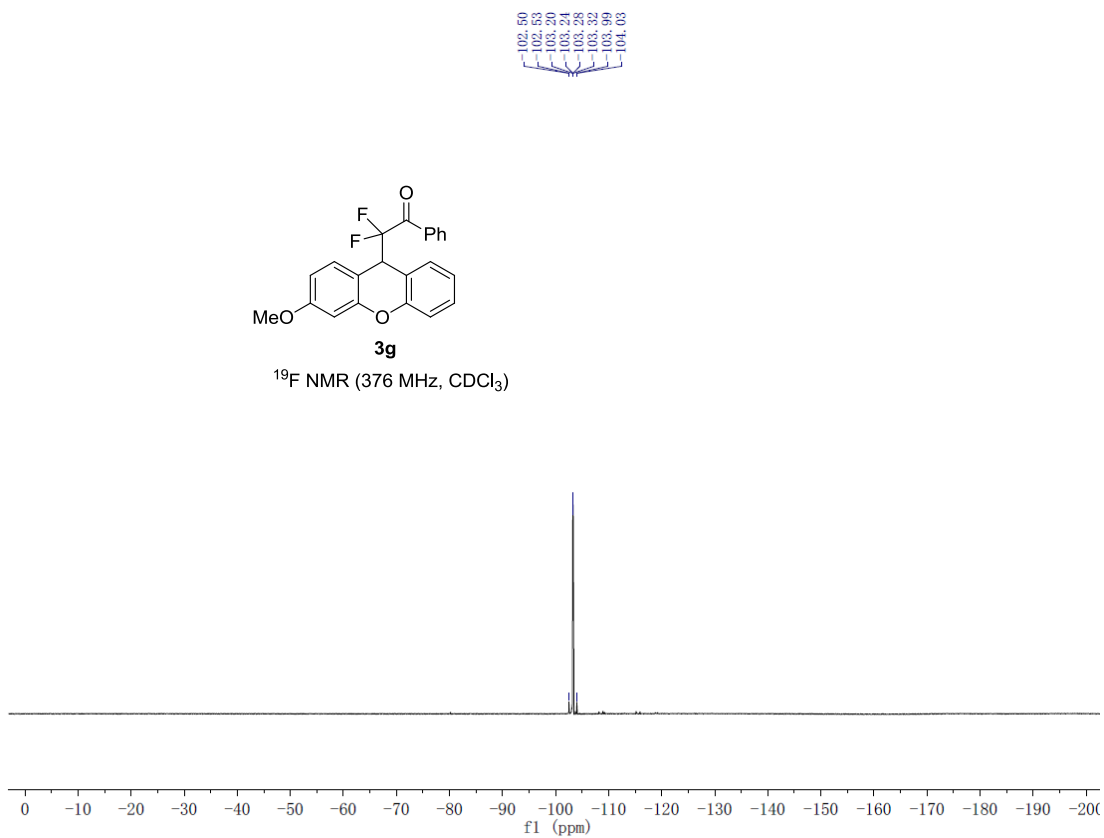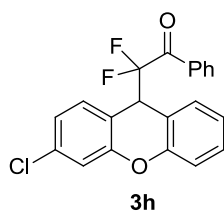

<sup>1</sup>H NMR (400 MHz, CDCl<sub>3</sub>)

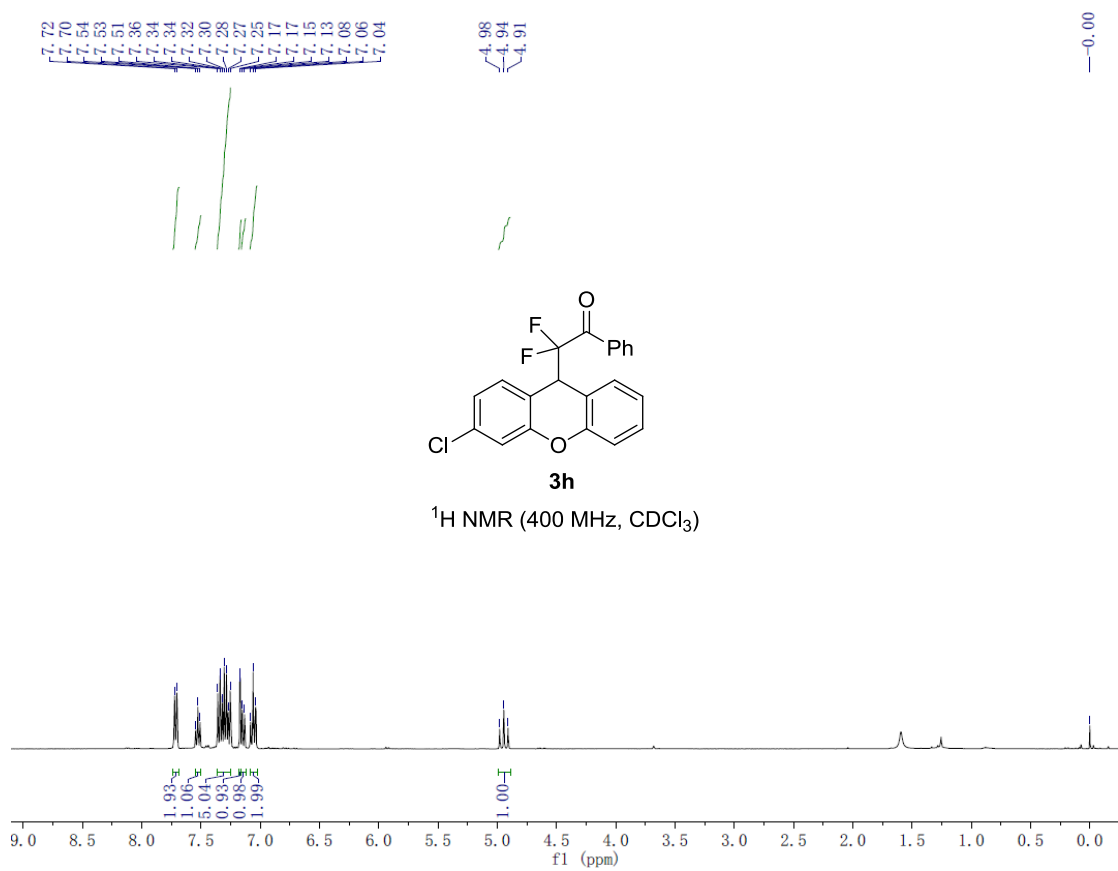

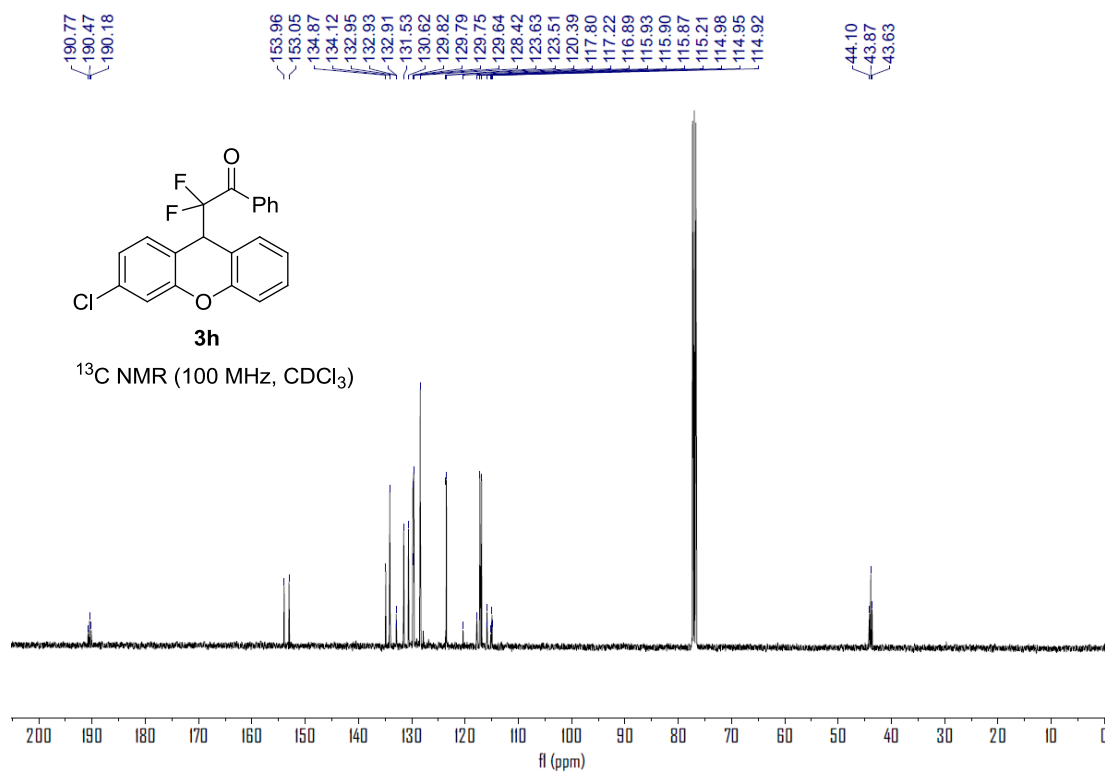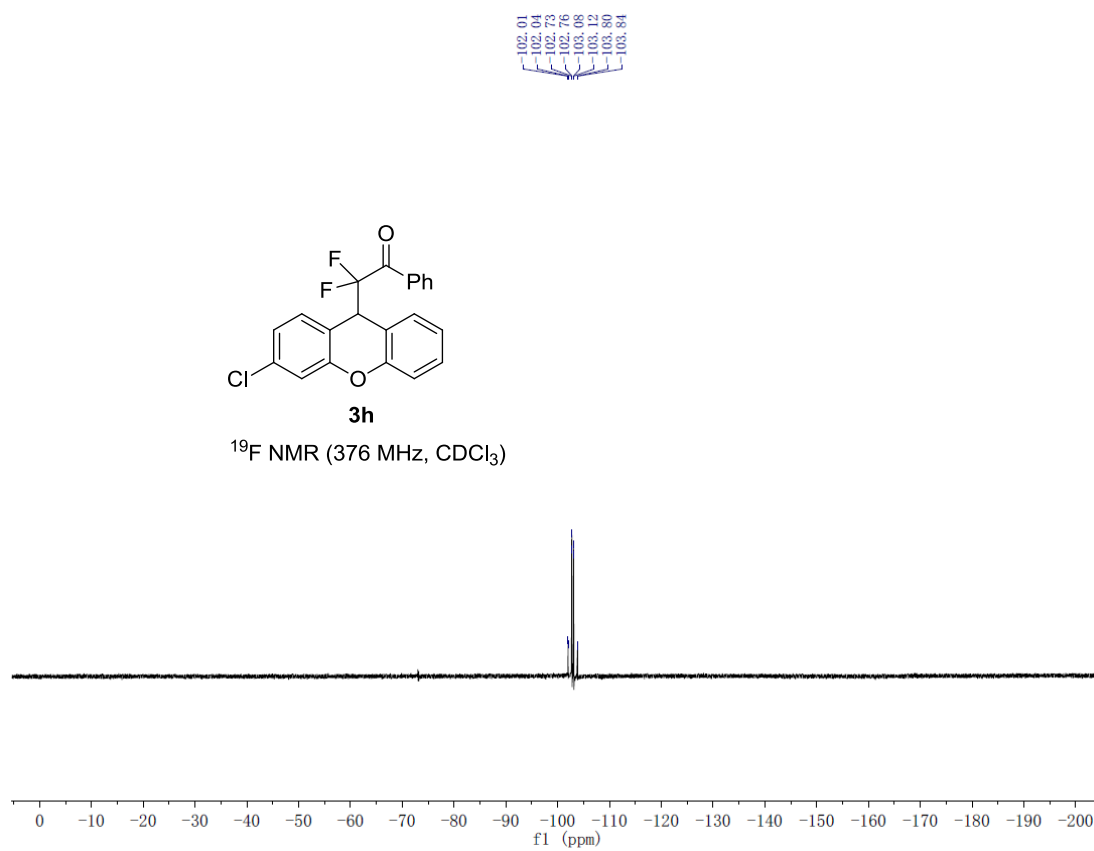

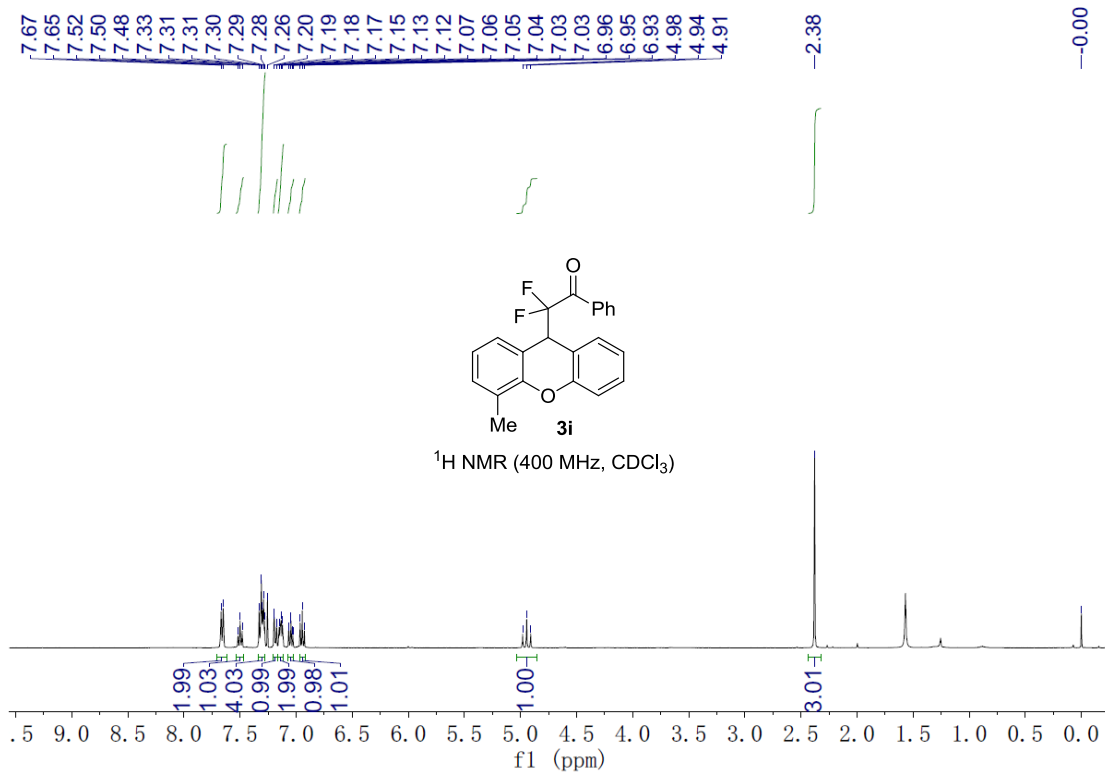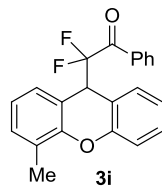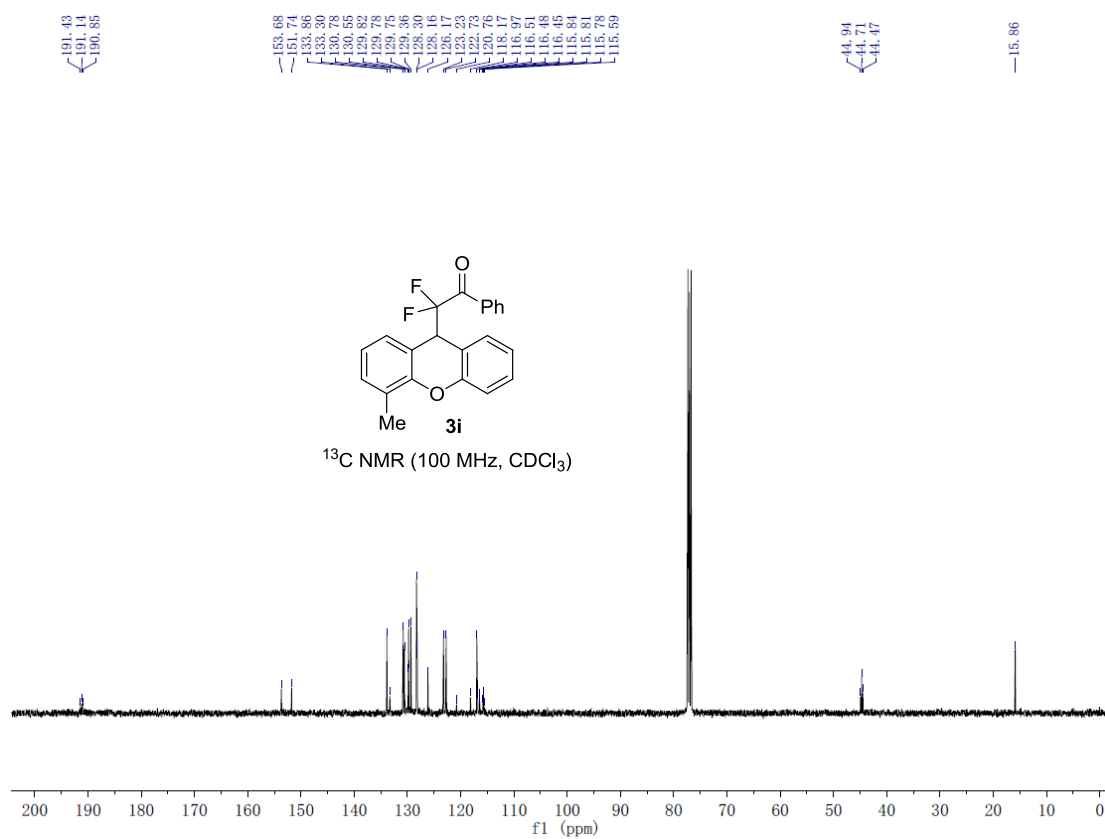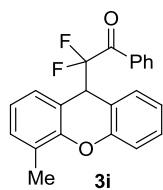

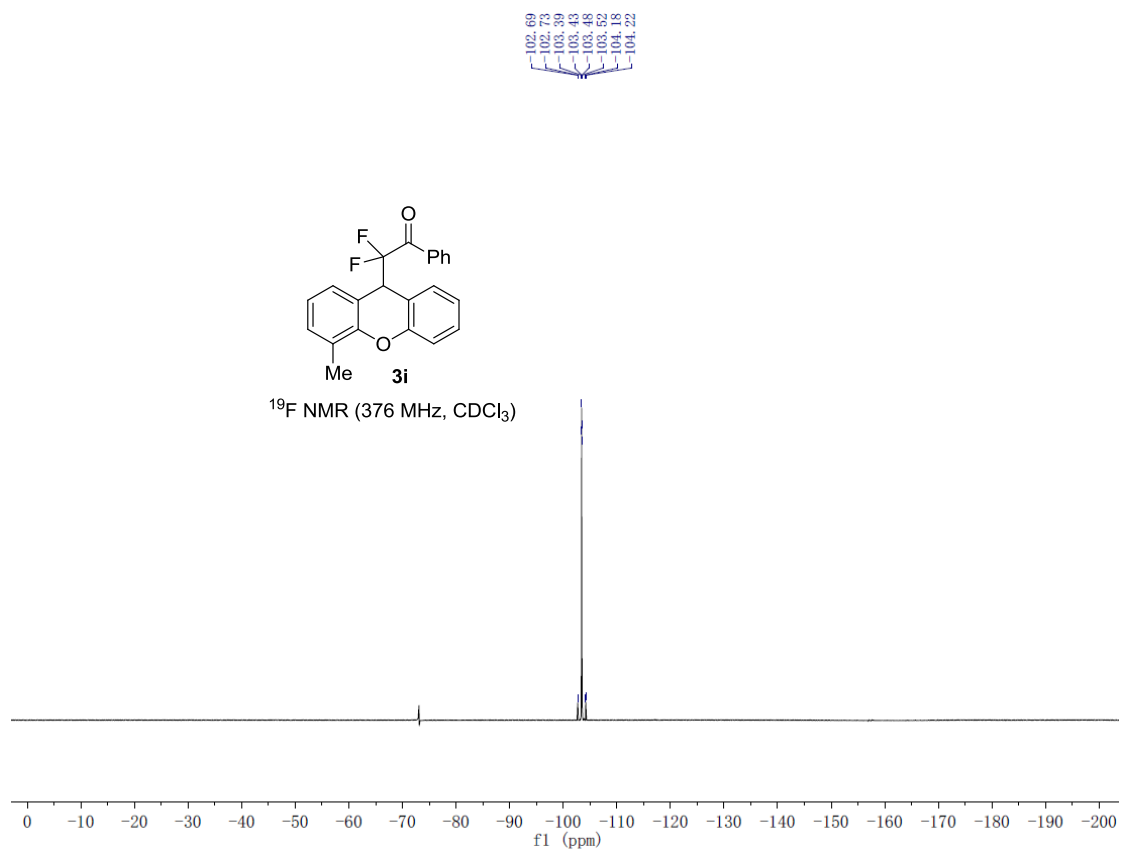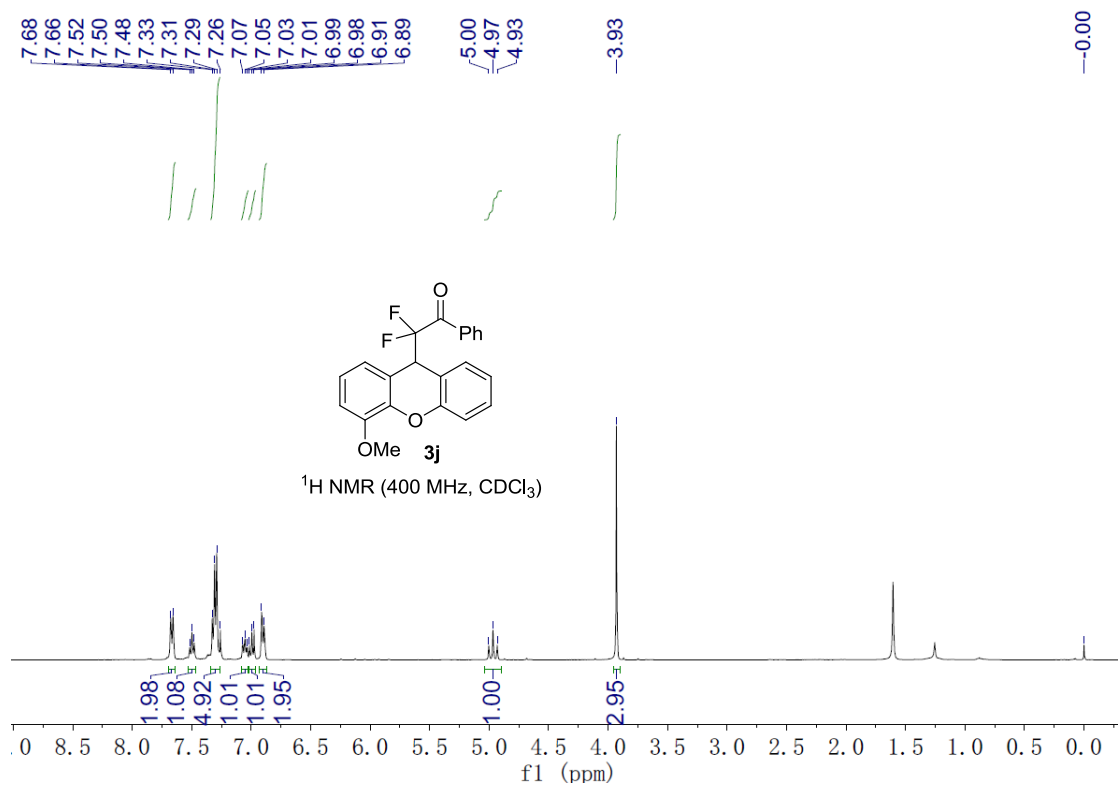

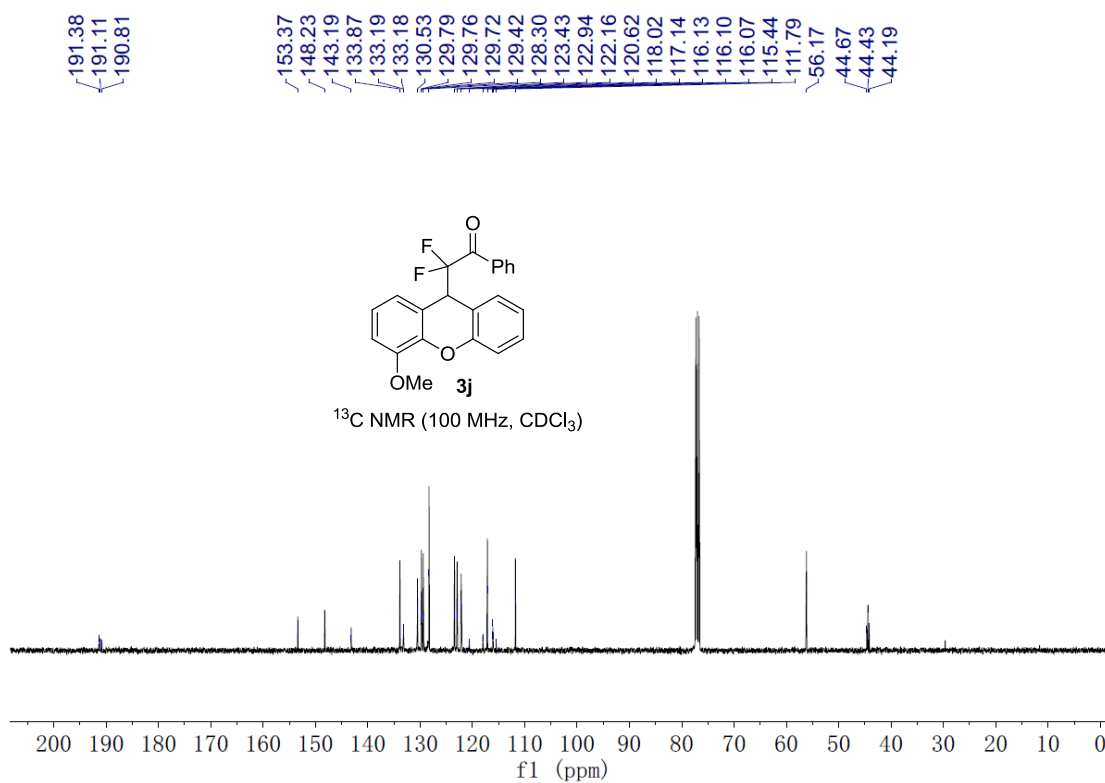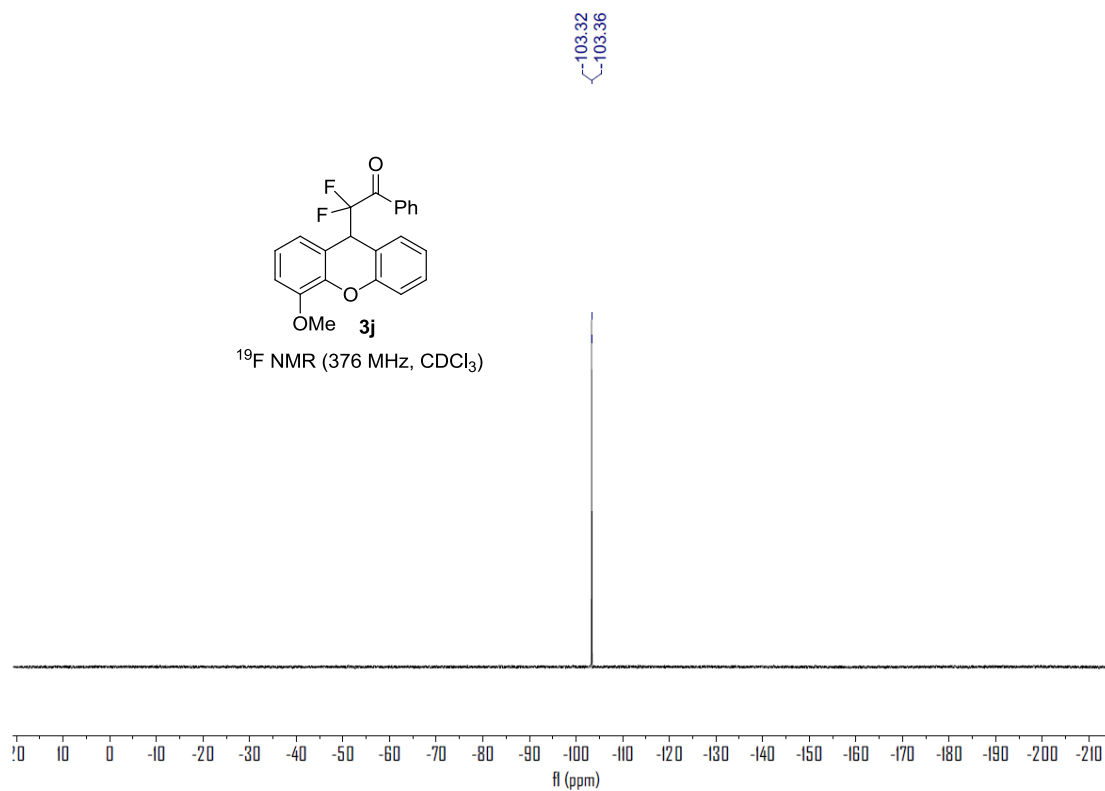

7.72  
7.70  
7.54  
7.52  
7.50  
7.36  
7.34  
7.34  
7.33  
7.32  
7.31  
7.26  
7.24  
7.13  
7.13  
7.09  
7.07  
7.06  
7.01  
7.00  
6.99  
6.98  
6.98  
6.97  
6.96  
5.04  
5.01  
4.97

---0.00

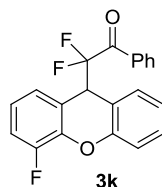

<sup>1</sup>H NMR (400 MHz, CDCl<sub>3</sub>)

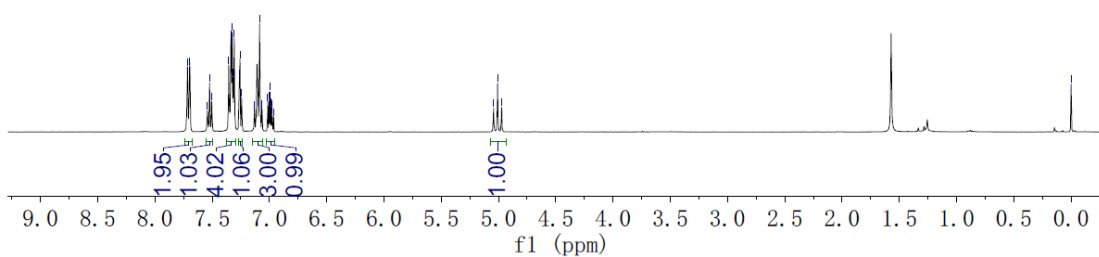

196.95  
196.96  
196.37

152.42  
149.95  
142.02  
141.91  
134.14  
133.02  
130.70  
129.84  
129.81  
129.77  
129.73  
128.45  
125.61  
125.57  
123.85  
122.88  
122.81  
120.46  
118.96  
118.95  
118.92  
117.87  
117.17  
116.27  
116.10  
115.92  
115.89  
115.86  
115.64

44.36  
44.13  
43.89

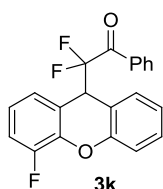

<sup>13</sup>C NMR (100 MHz, CDCl<sub>3</sub>)

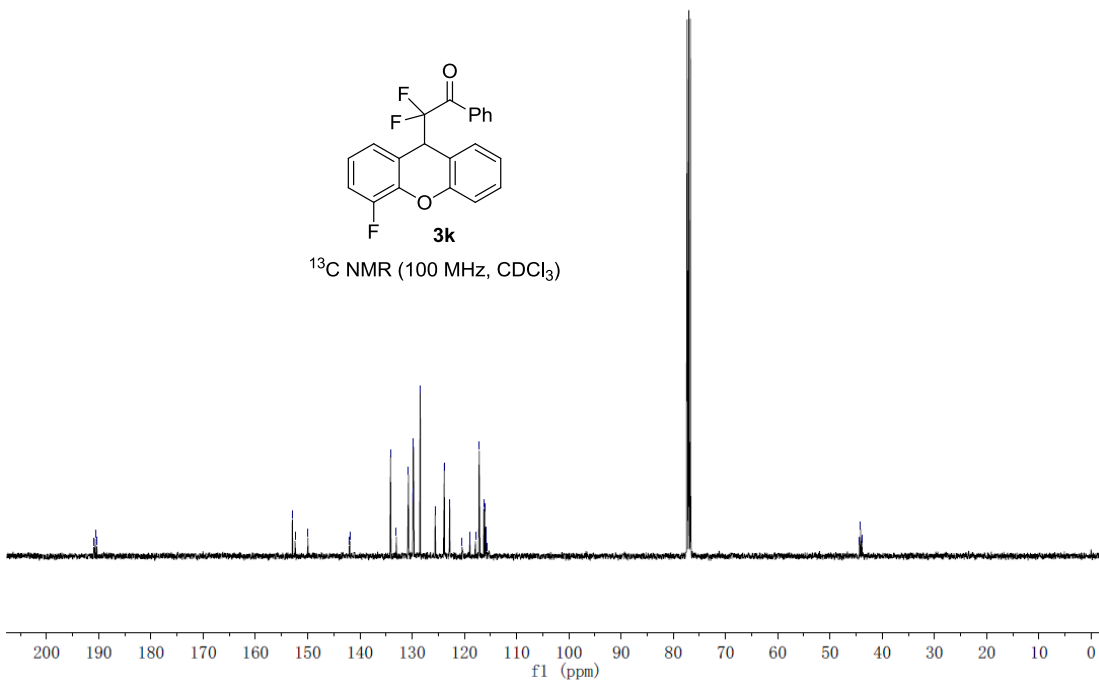

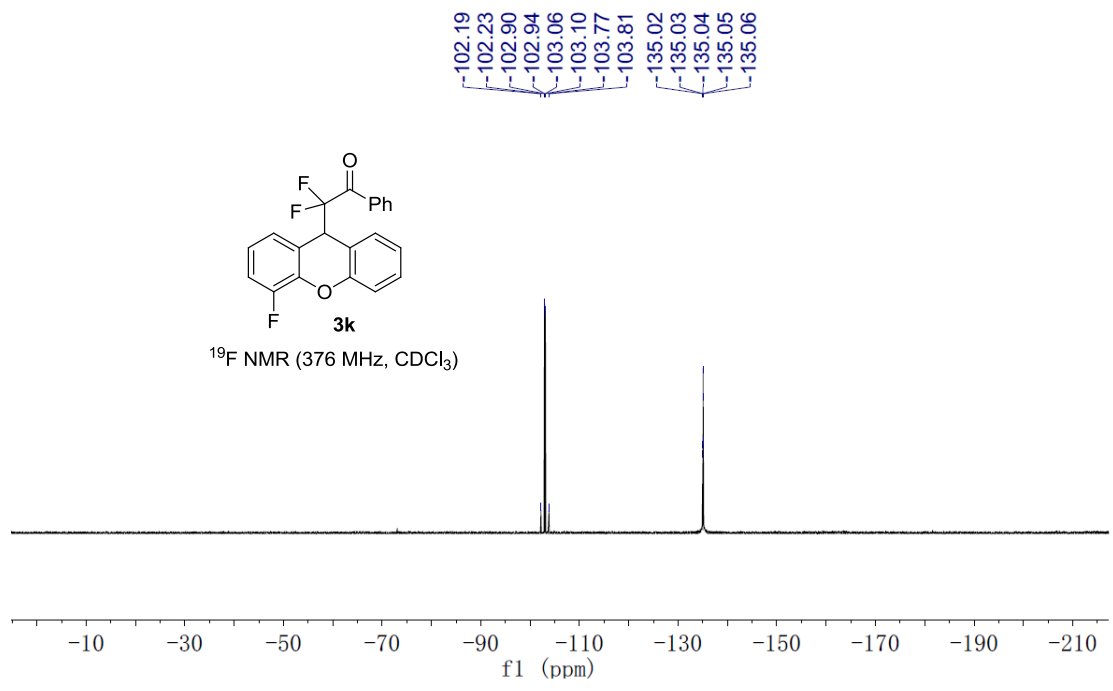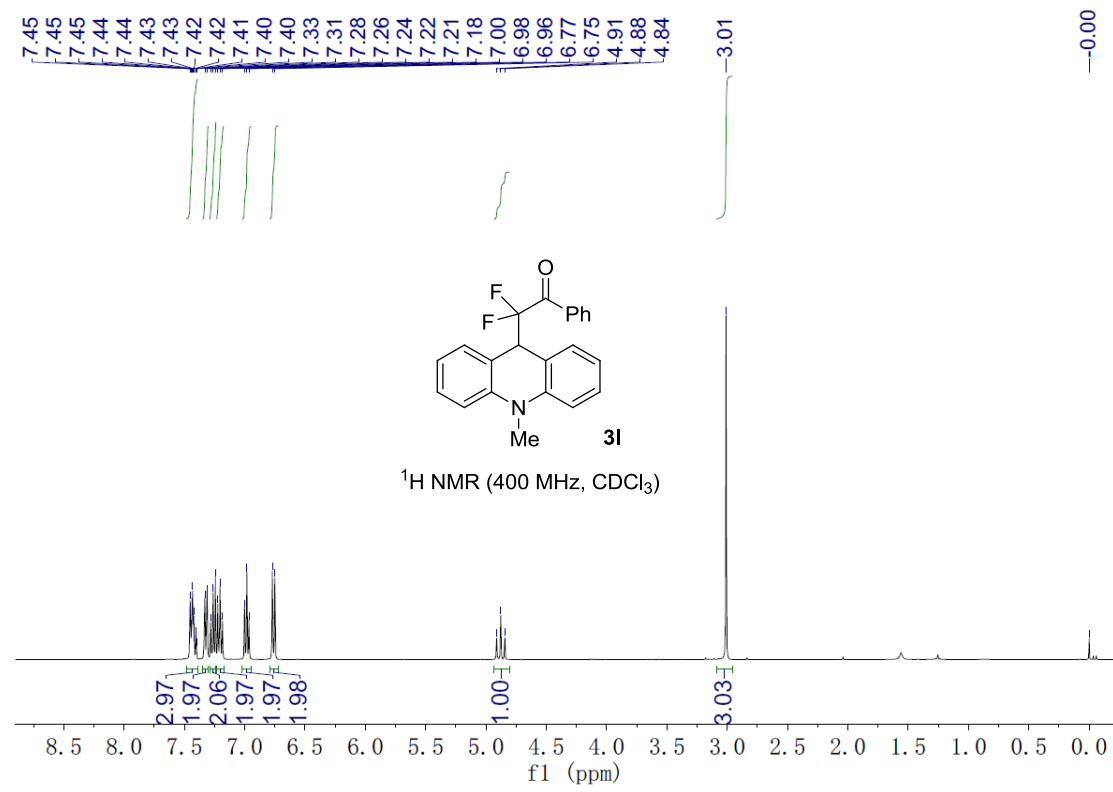



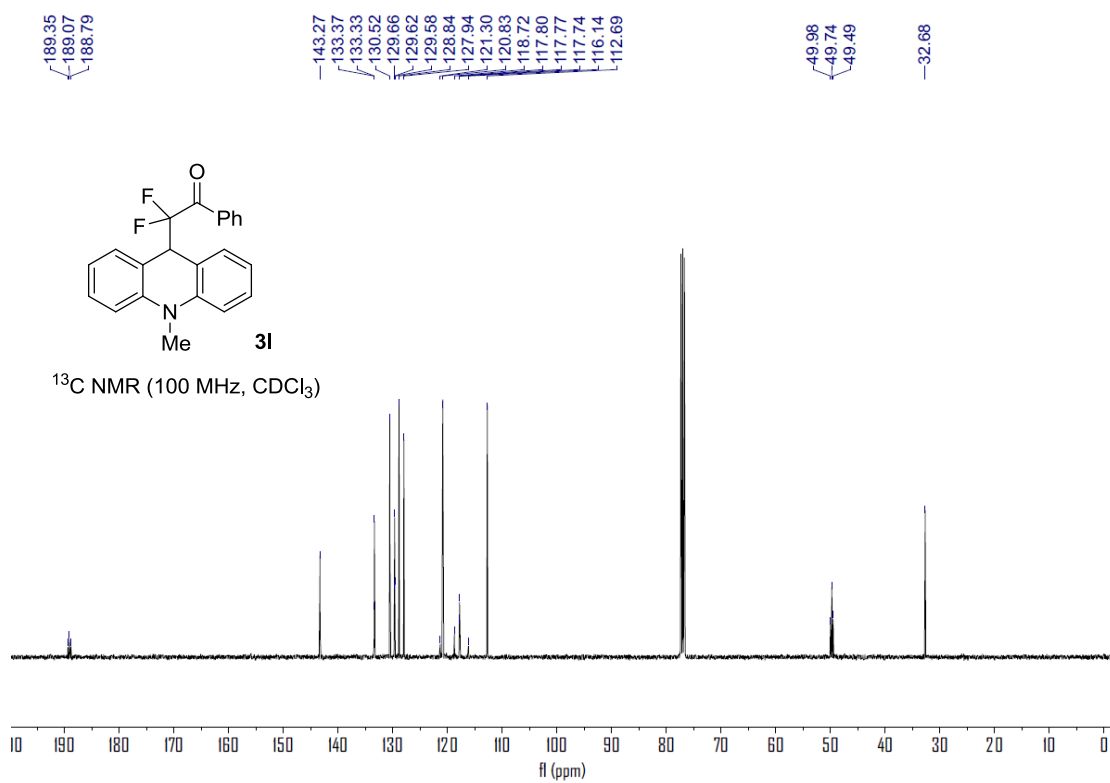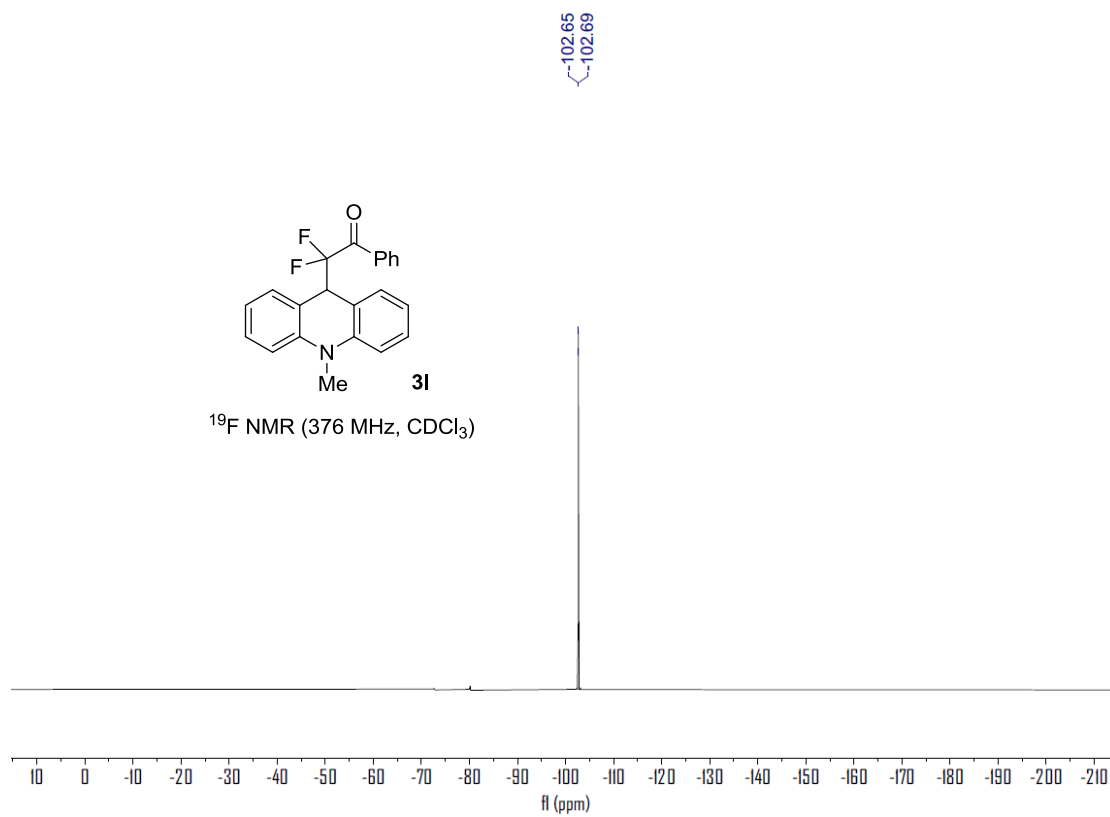

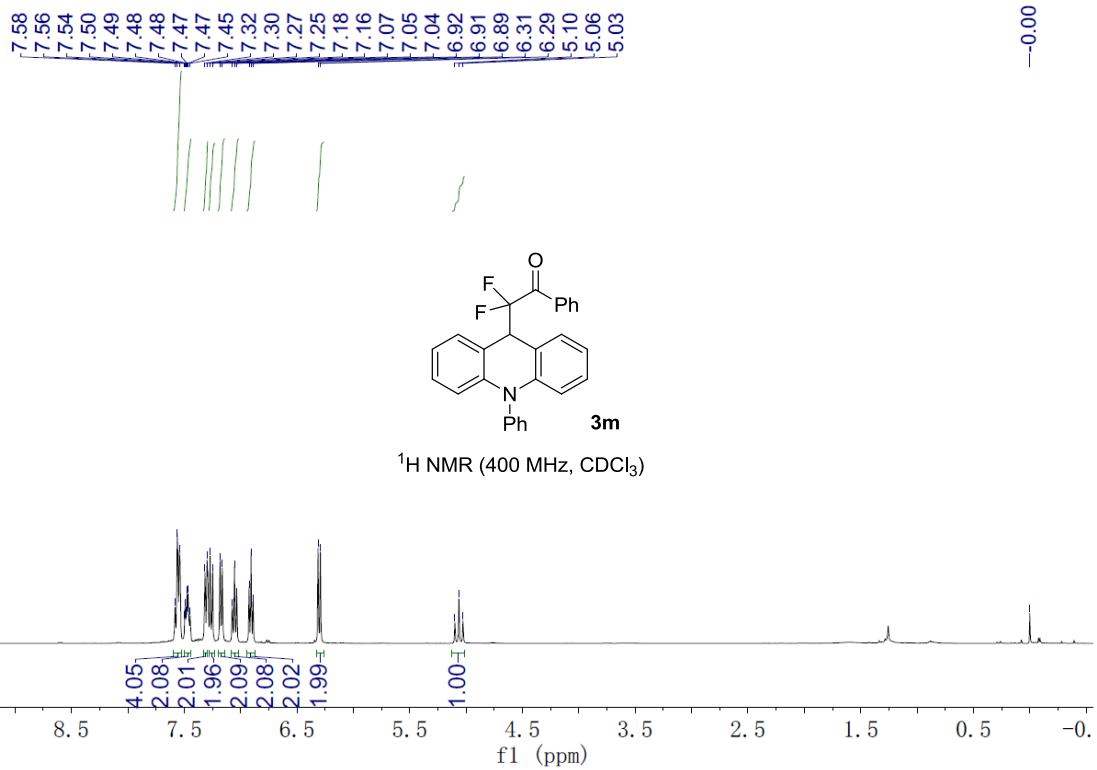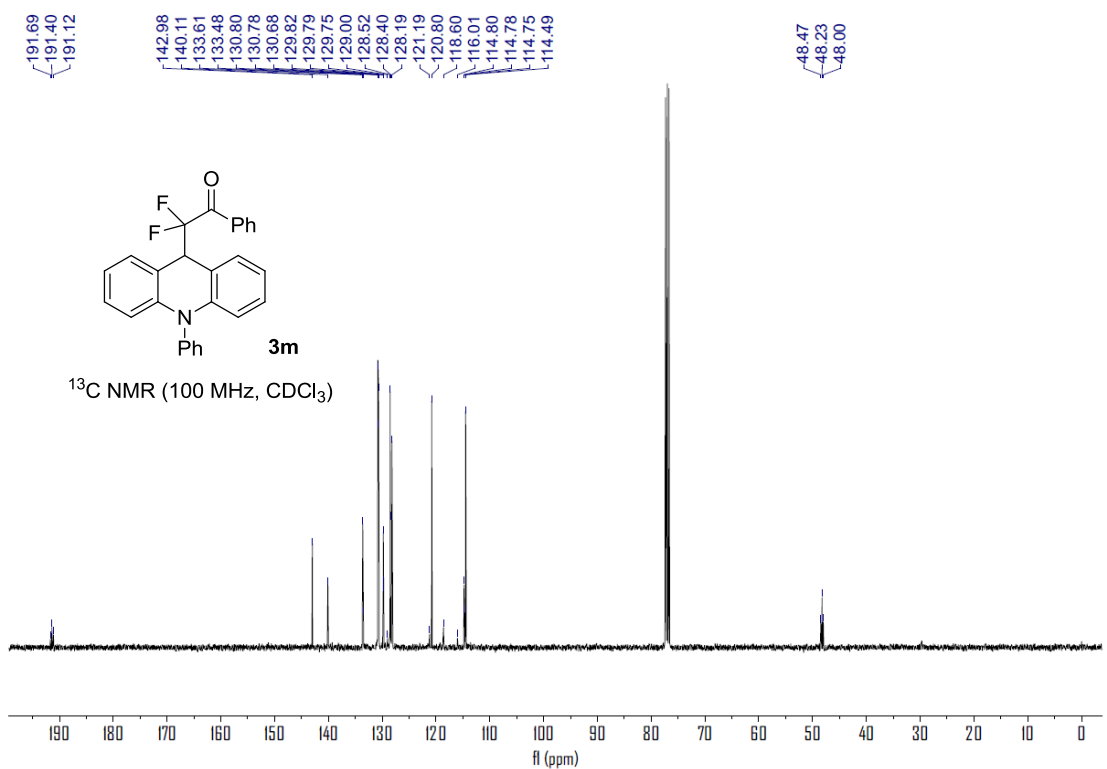

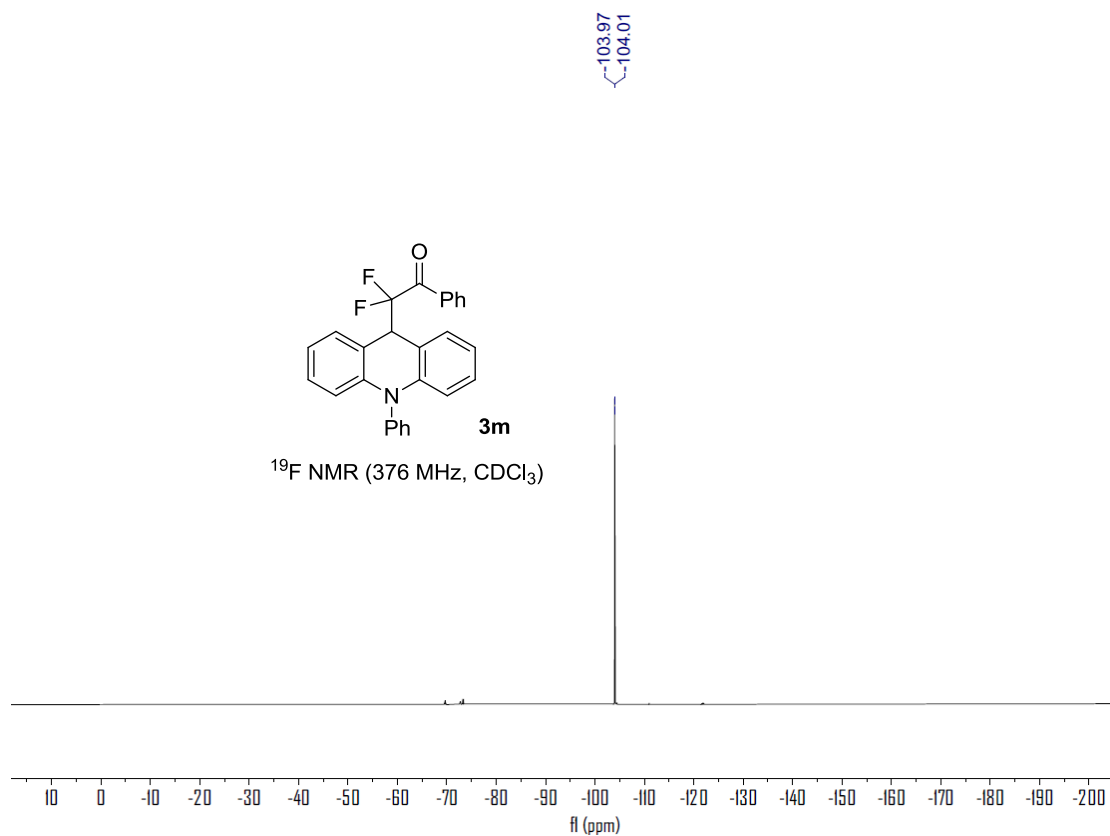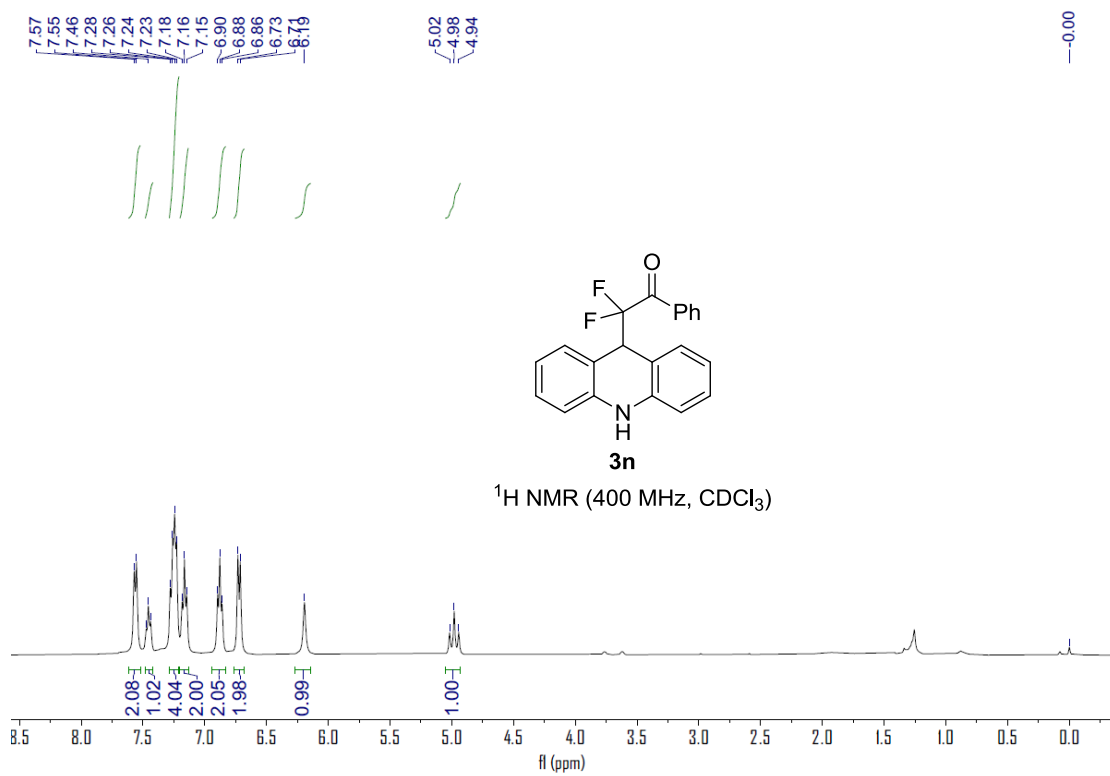

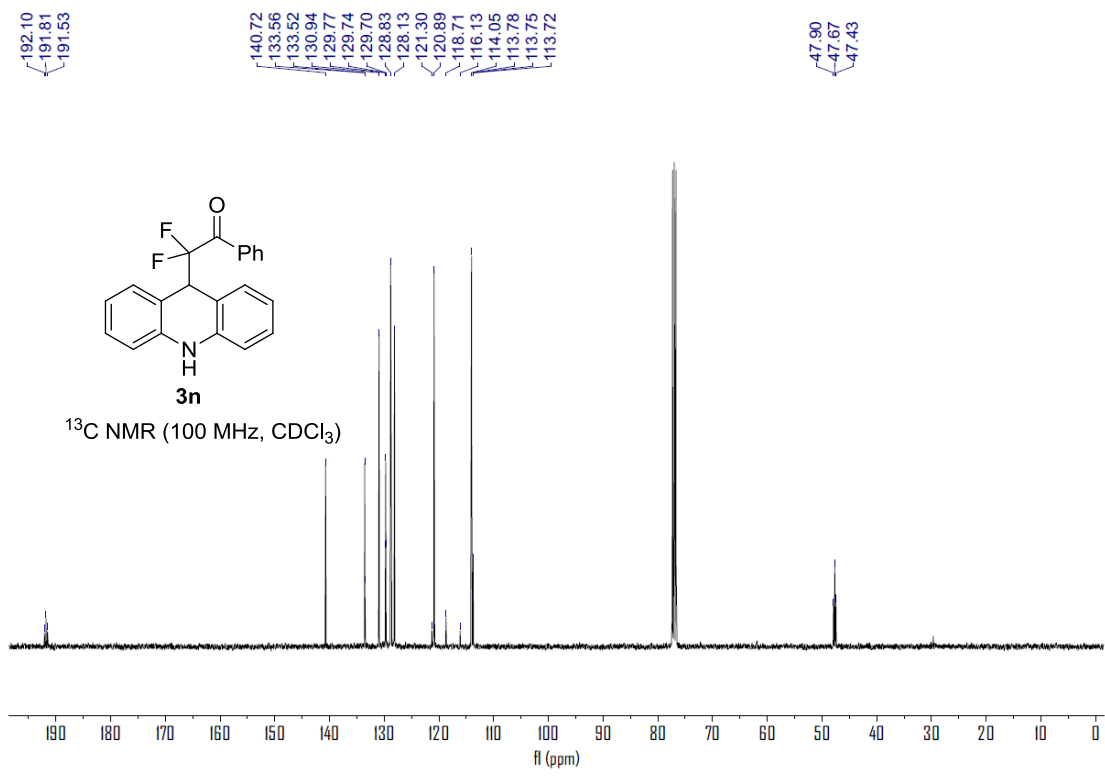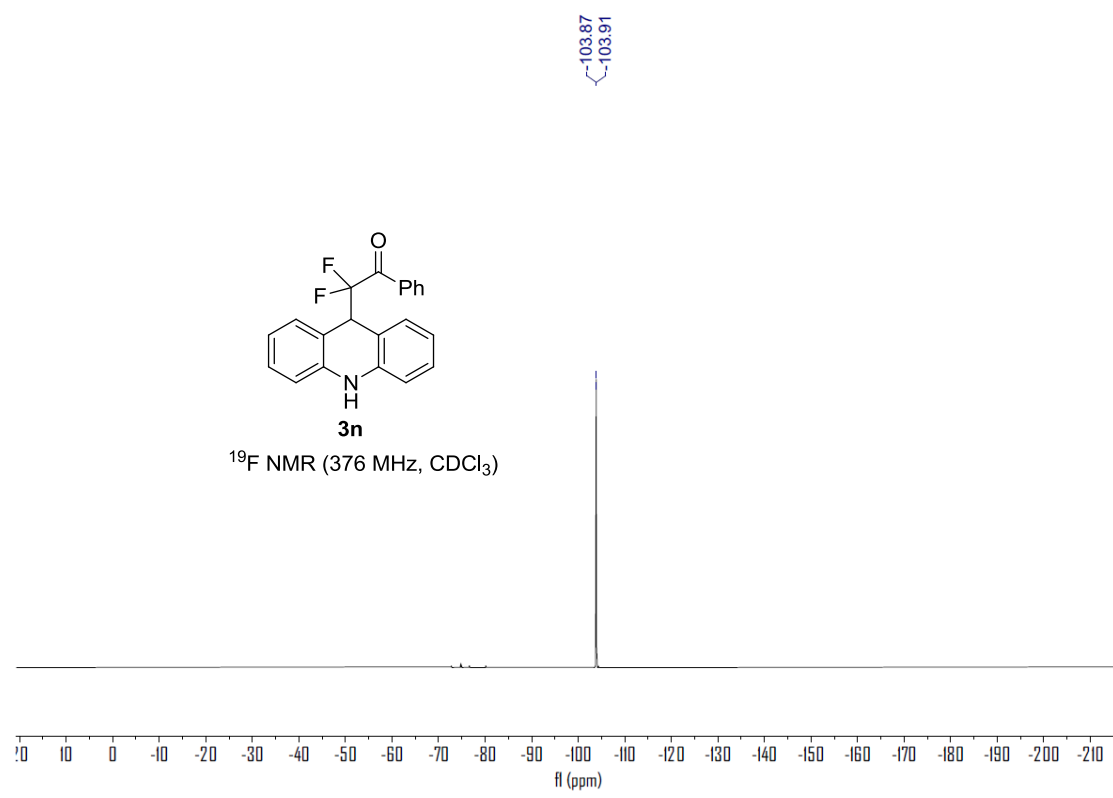

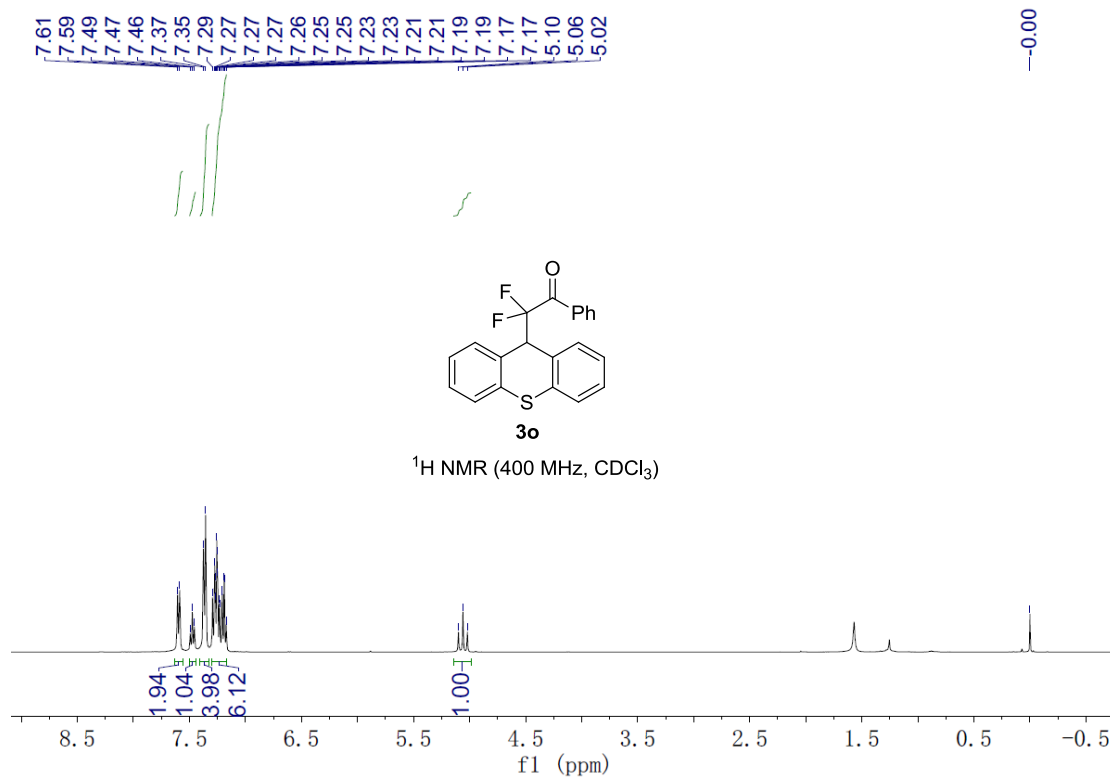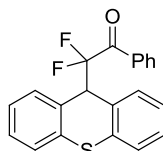

**3o**

<sup>1</sup>H NMR (400 MHz, CDCl<sub>3</sub>)

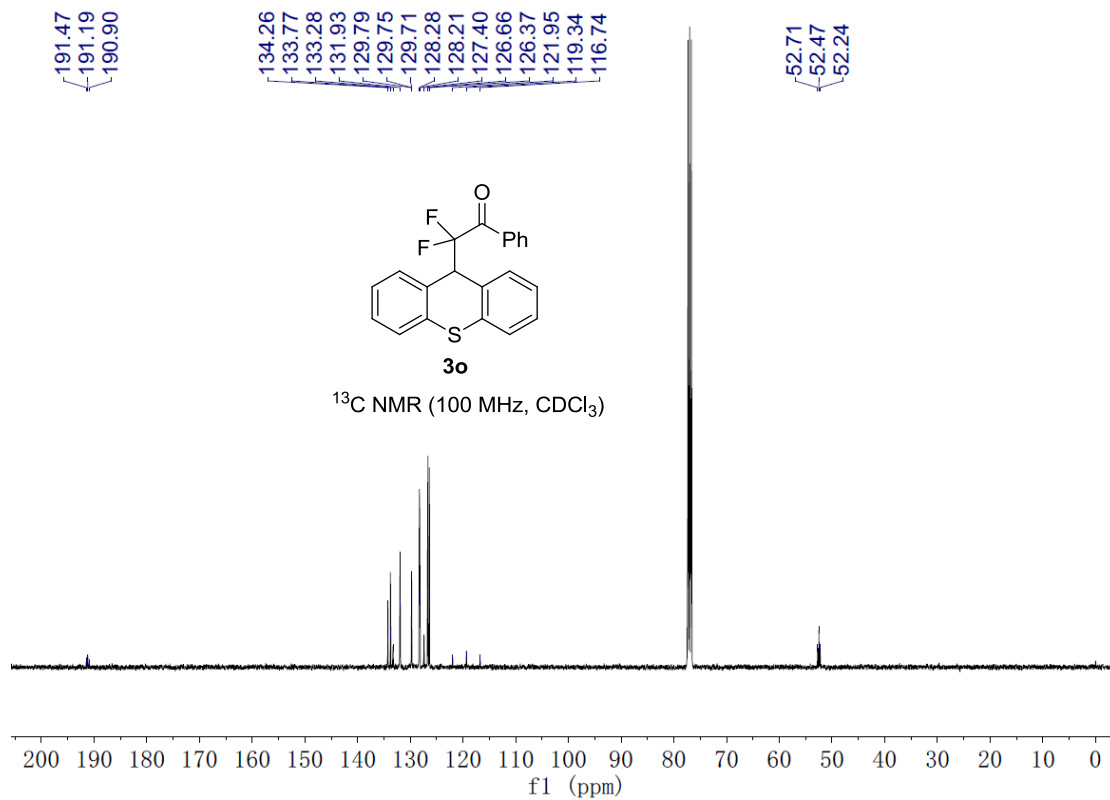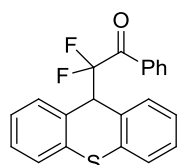

**3o**

<sup>13</sup>C NMR (100 MHz, CDCl<sub>3</sub>)

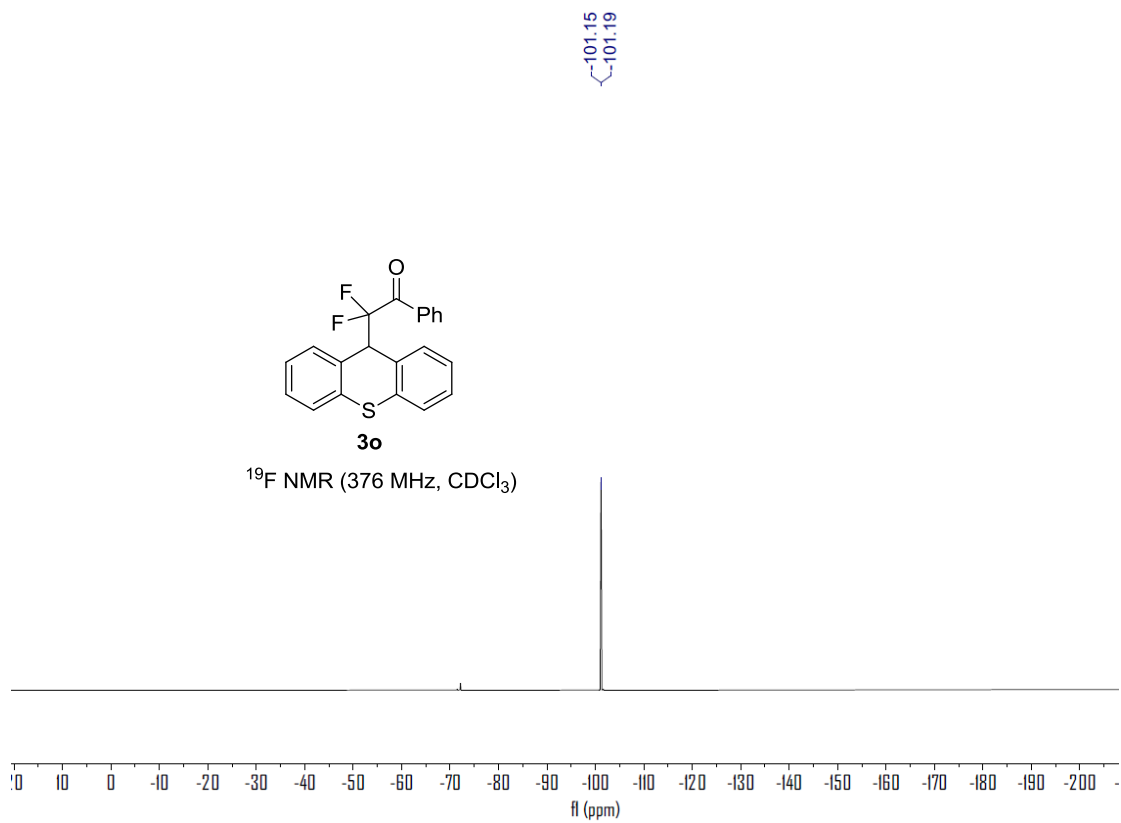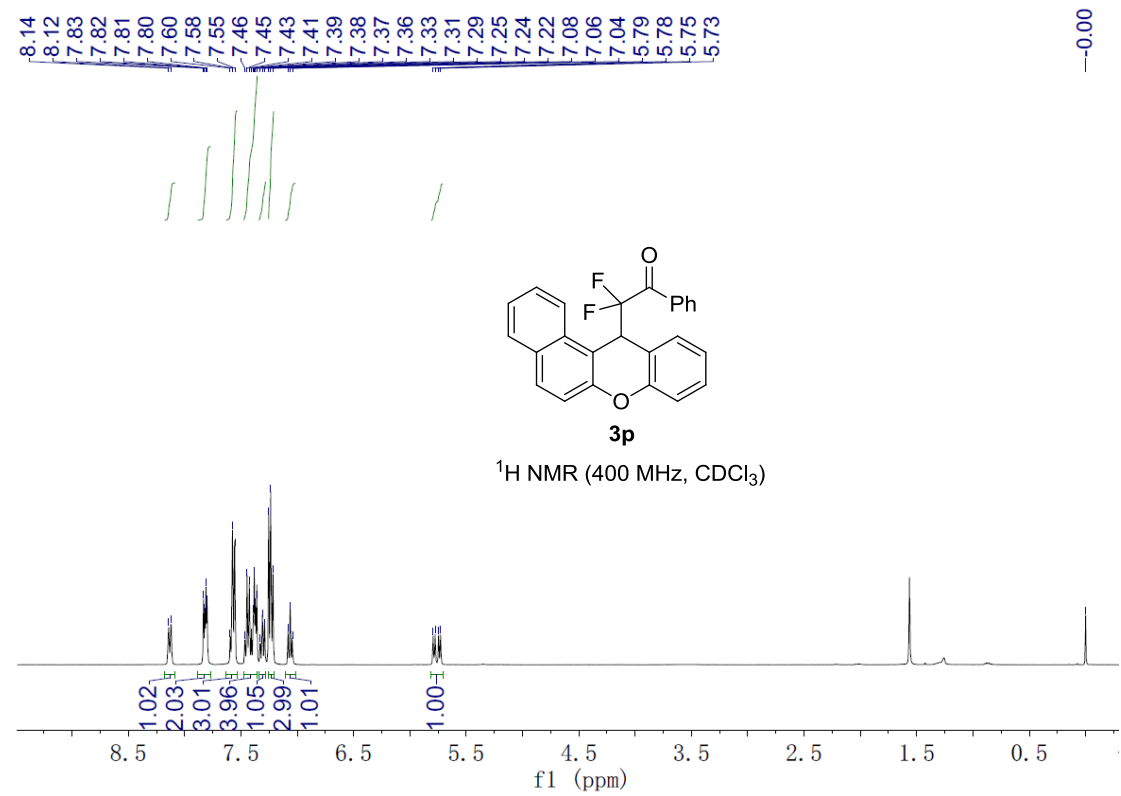

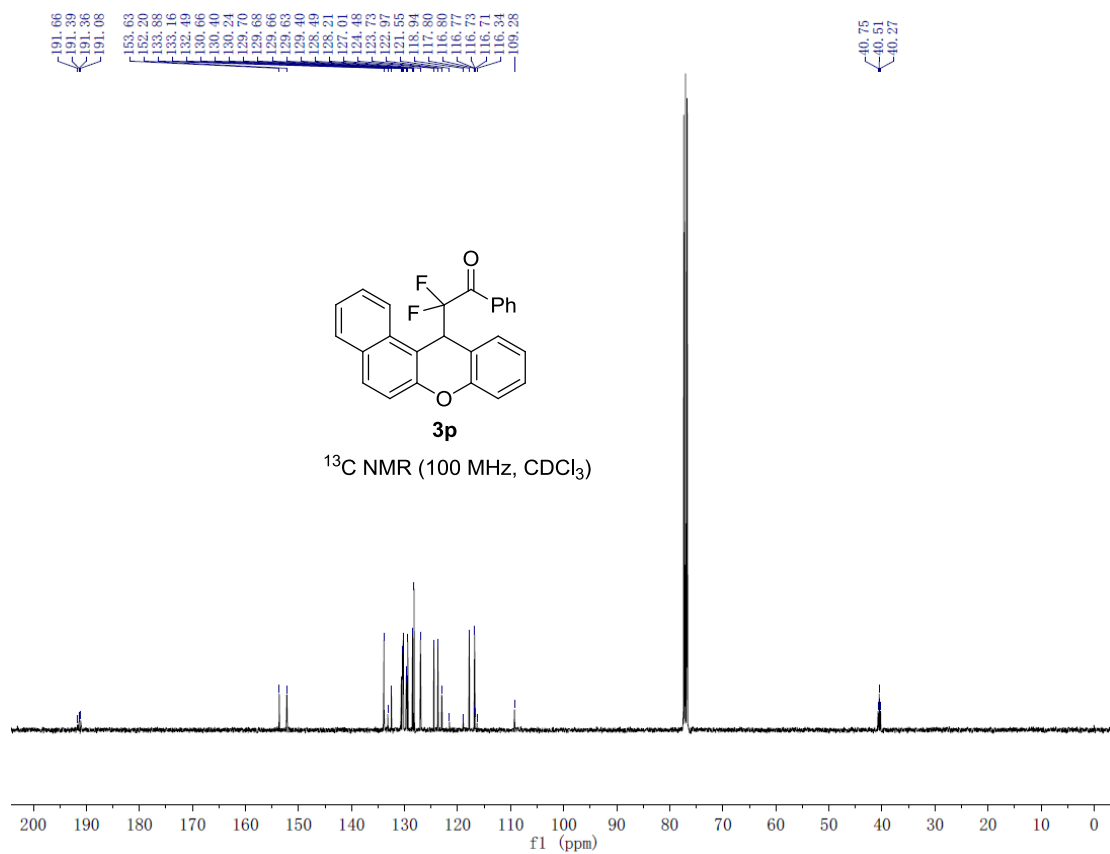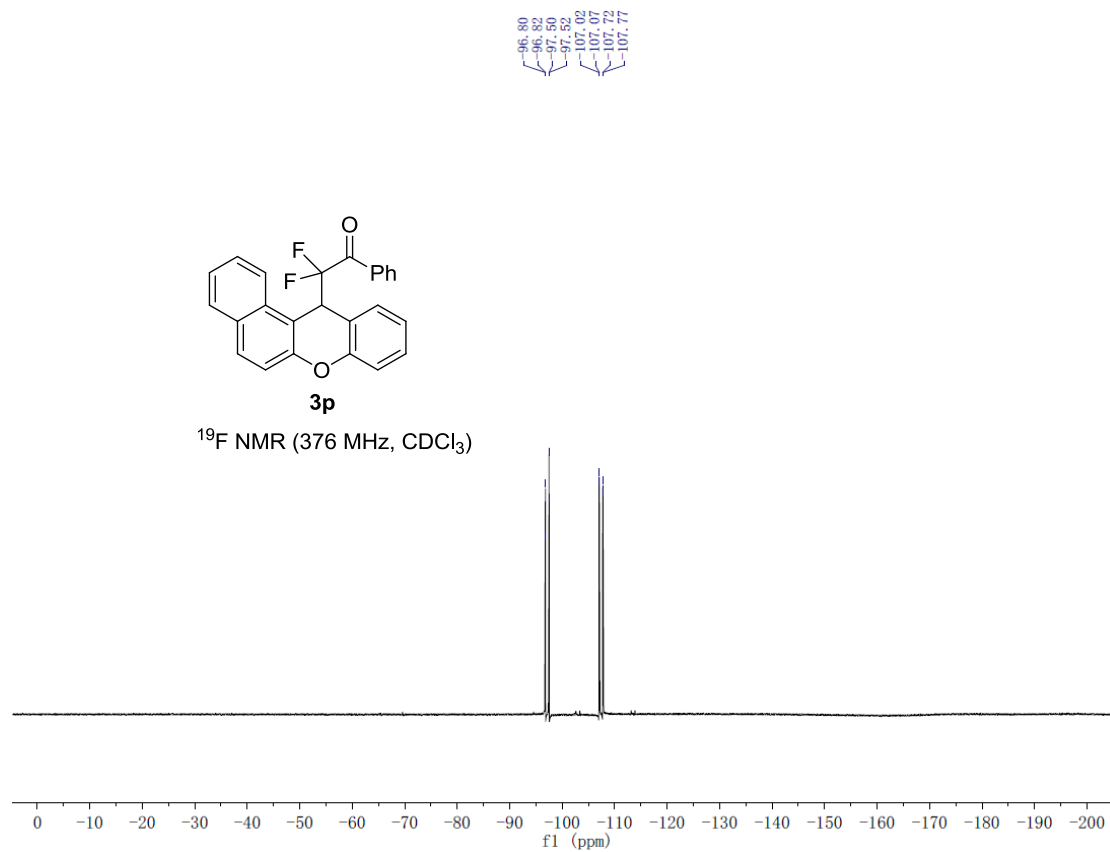

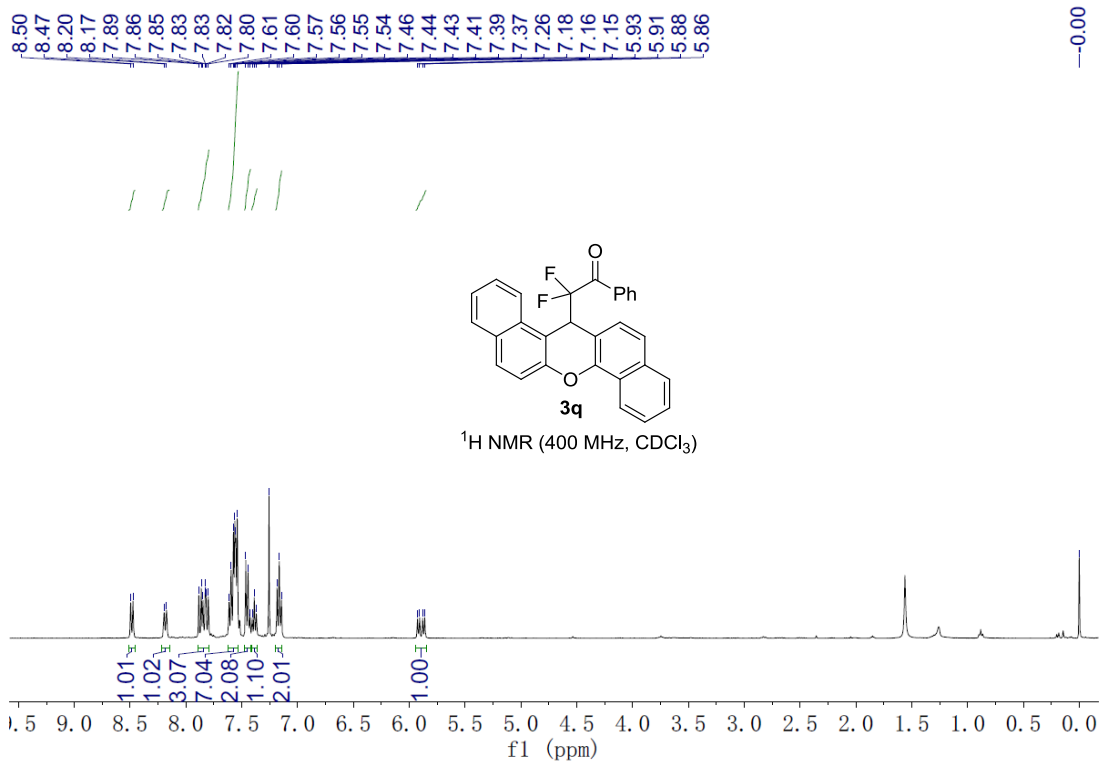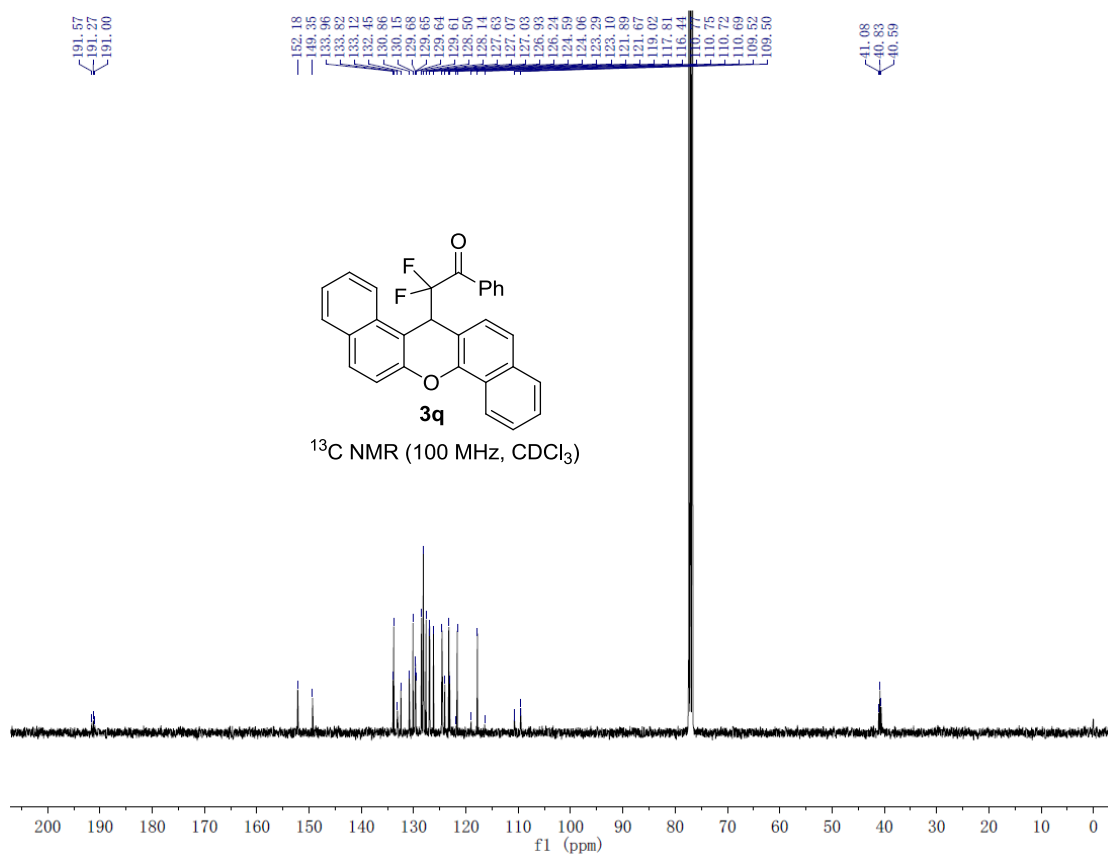



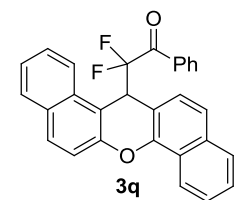

$^{19}\text{F}$  NMR (376 MHz,  $\text{CDCl}_3$ )

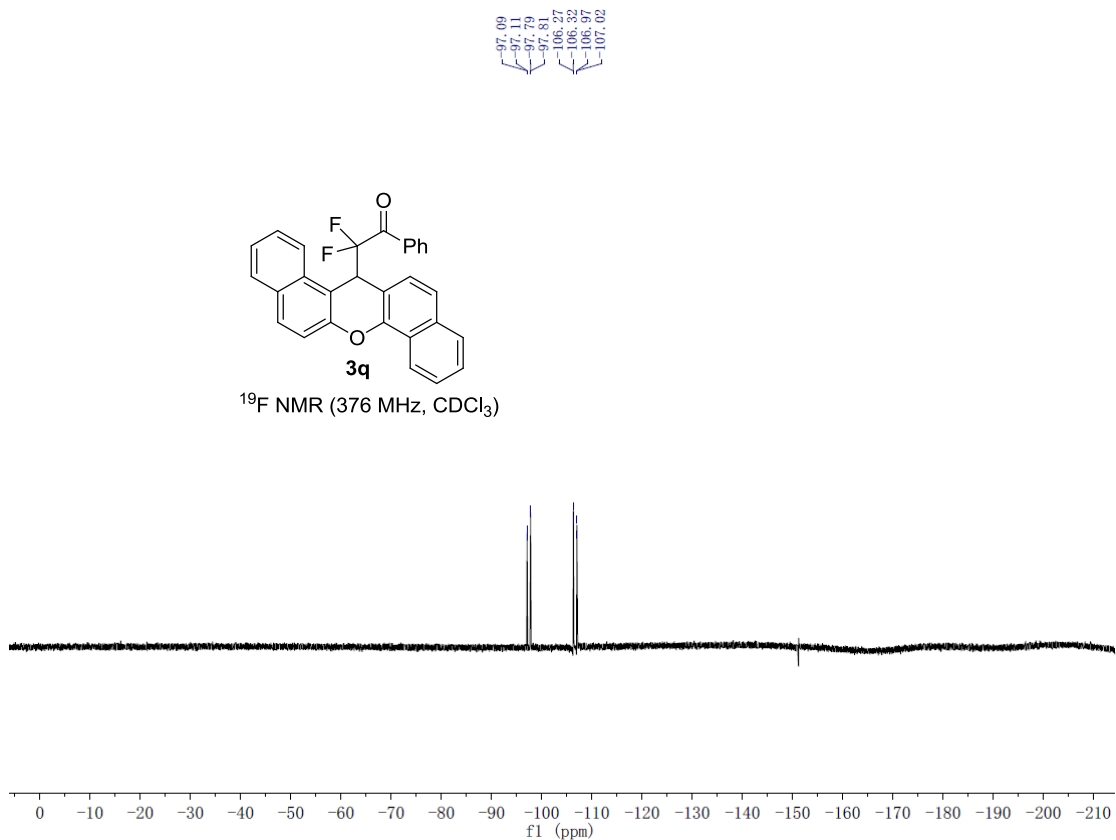

7.35, 7.33, 7.29, 7.18, 7.17, 7.16, 7.15, 7.14, 7.10, 7.07, 7.05, 7.03, 7.01, 6.93, 6.92, 6.90, 4.86, 4.82, 4.79, -2.14, -0.00

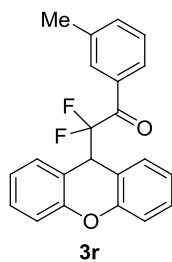

$^1\text{H}$  NMR (400 MHz,  $\text{CDCl}_3$ )

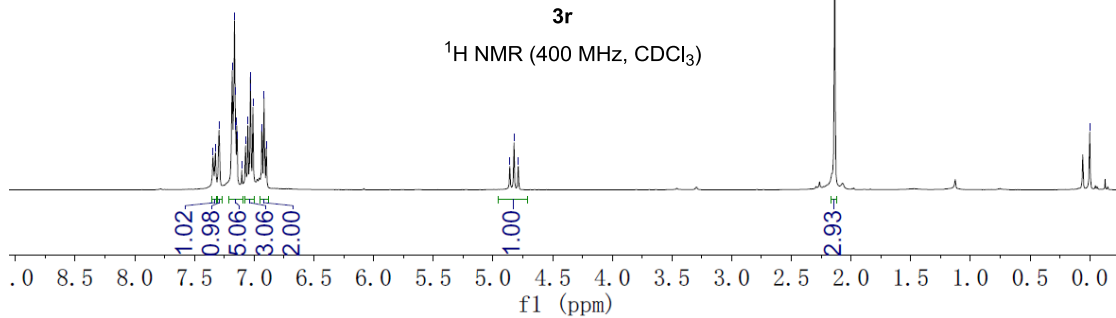

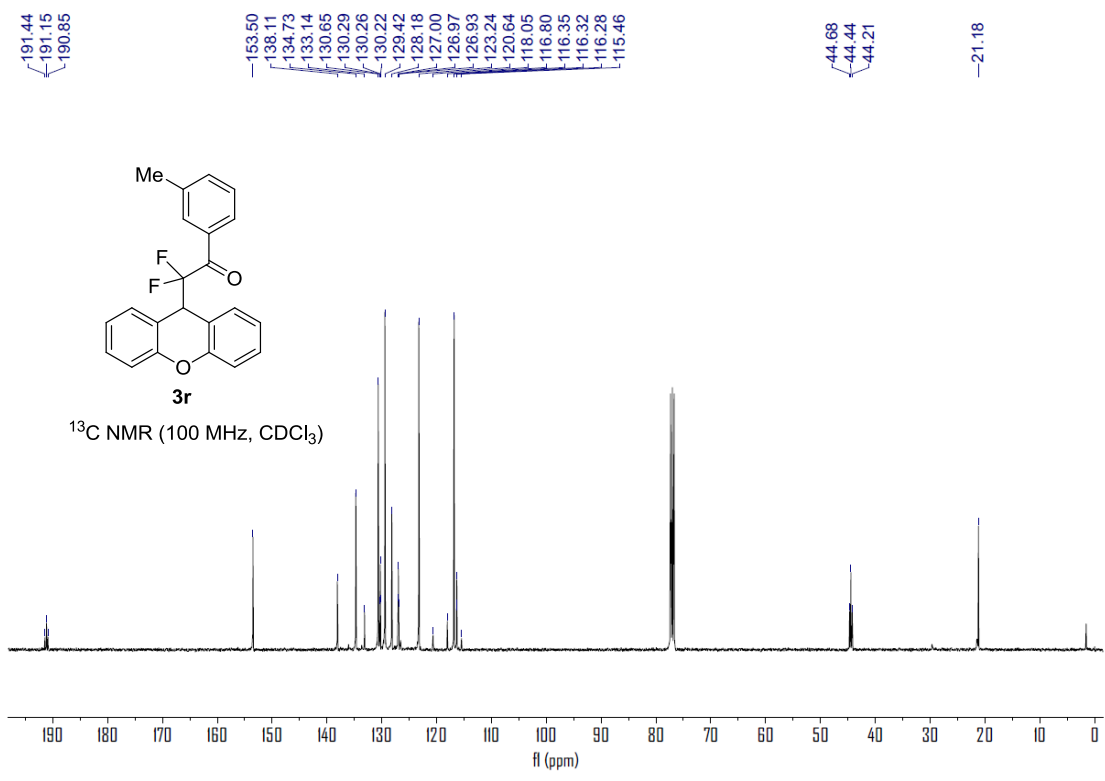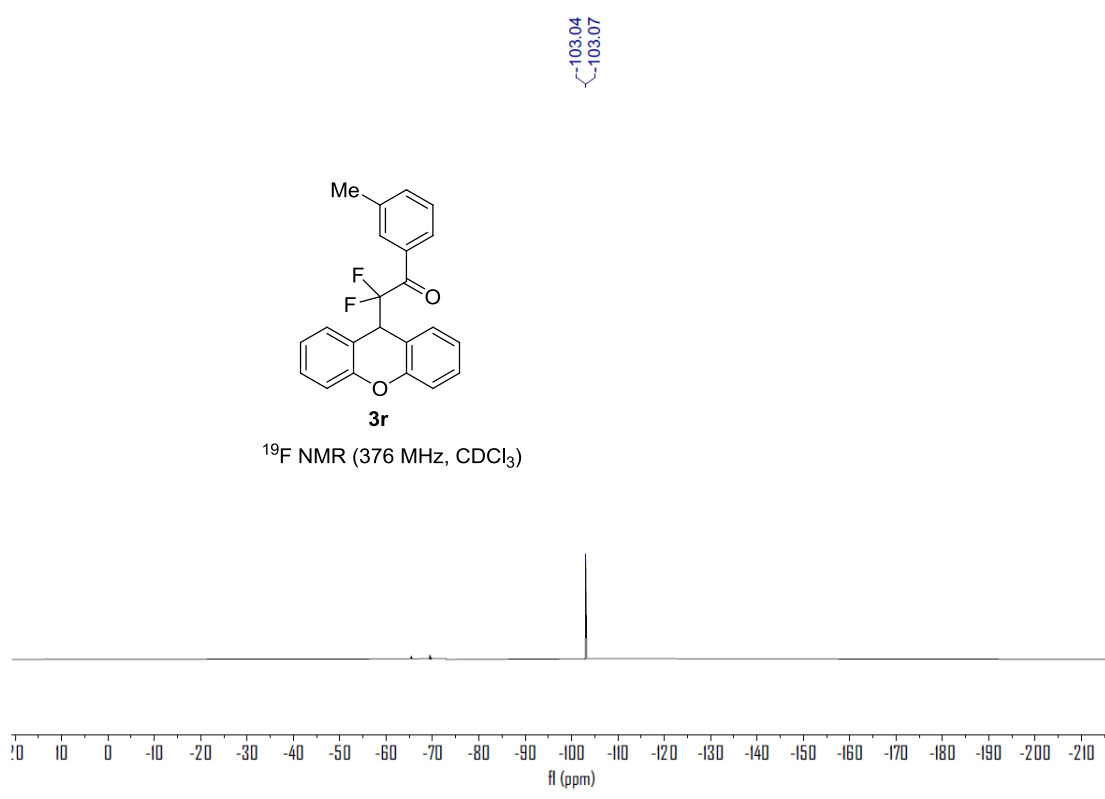

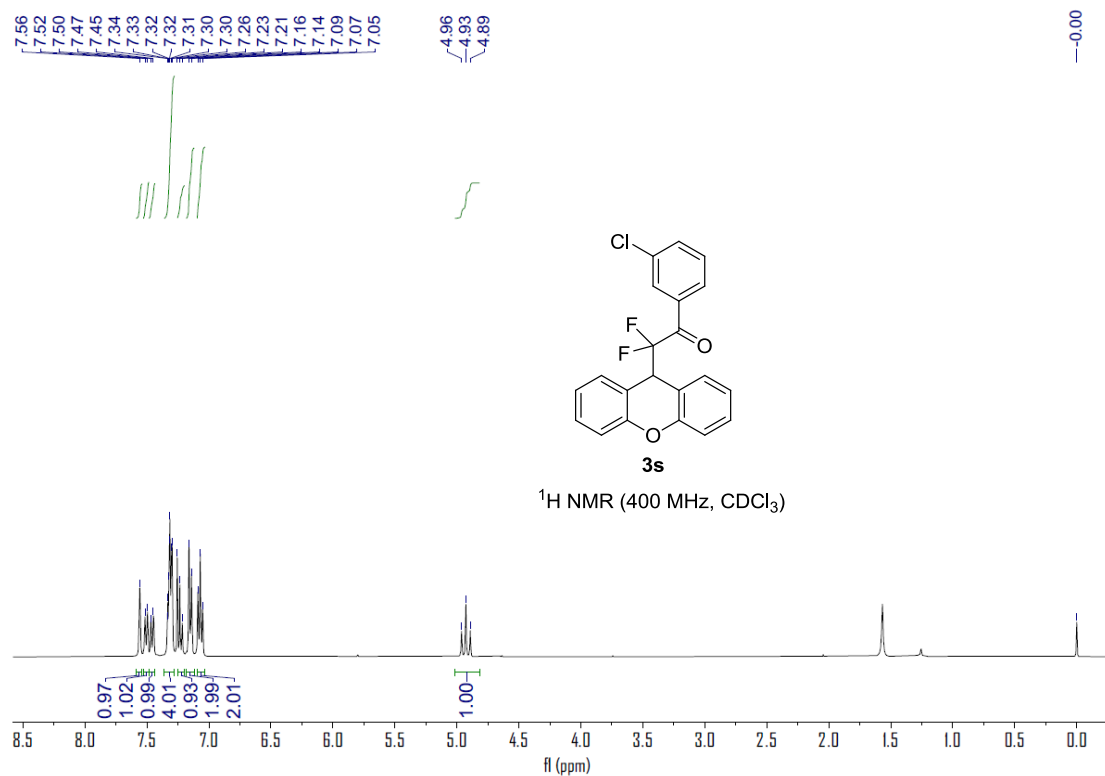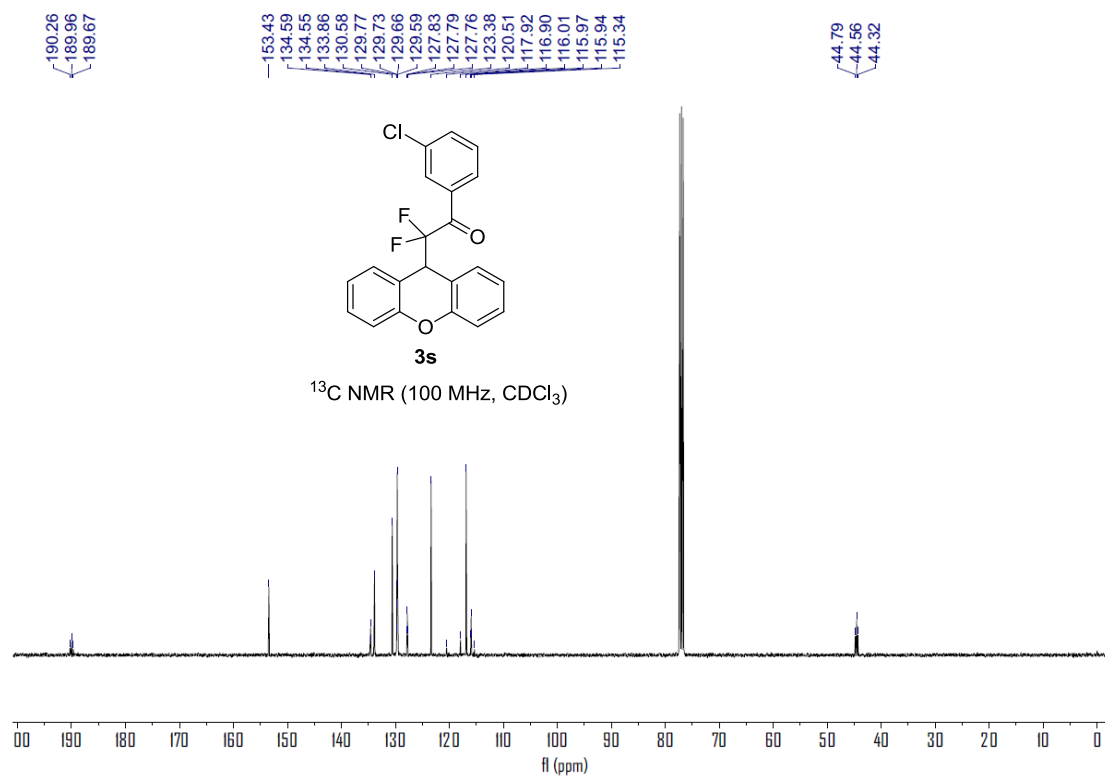

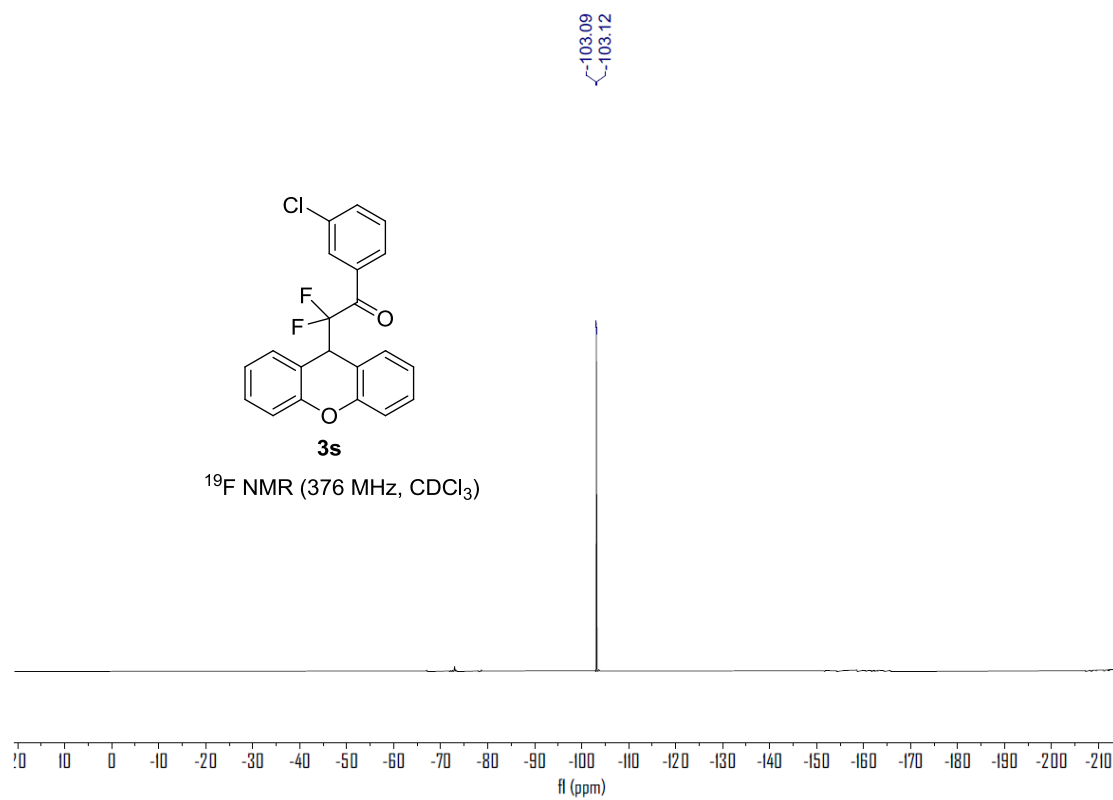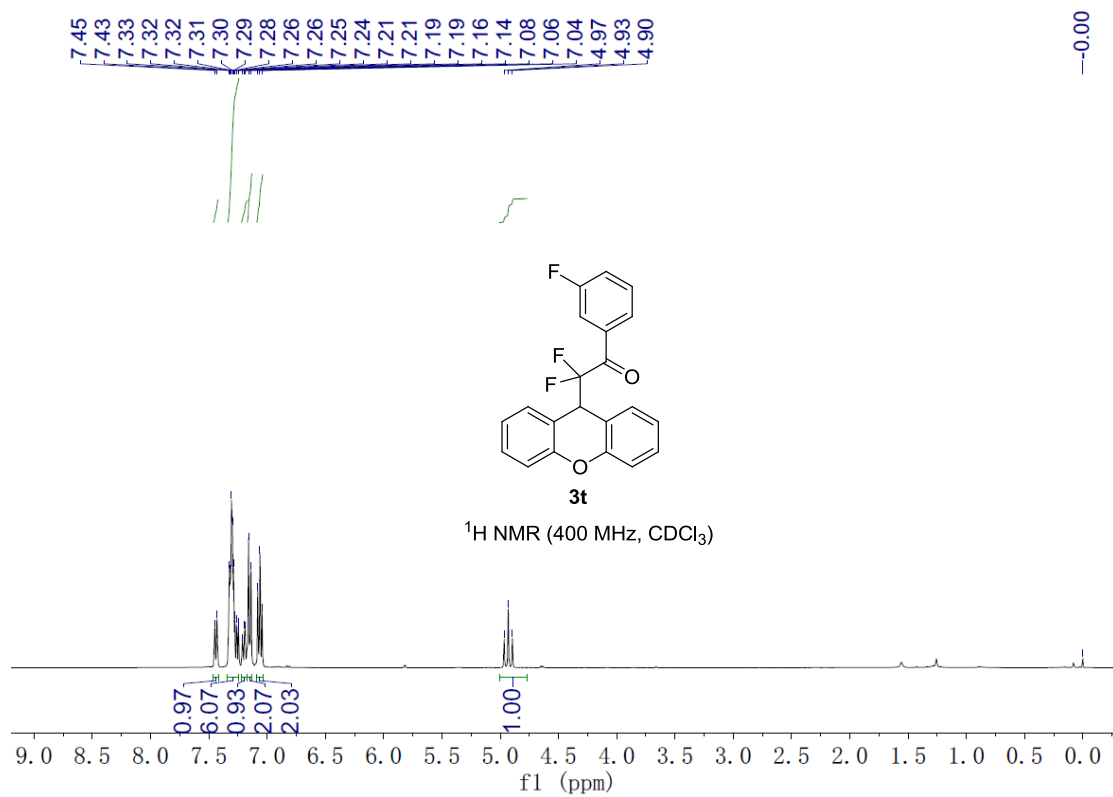

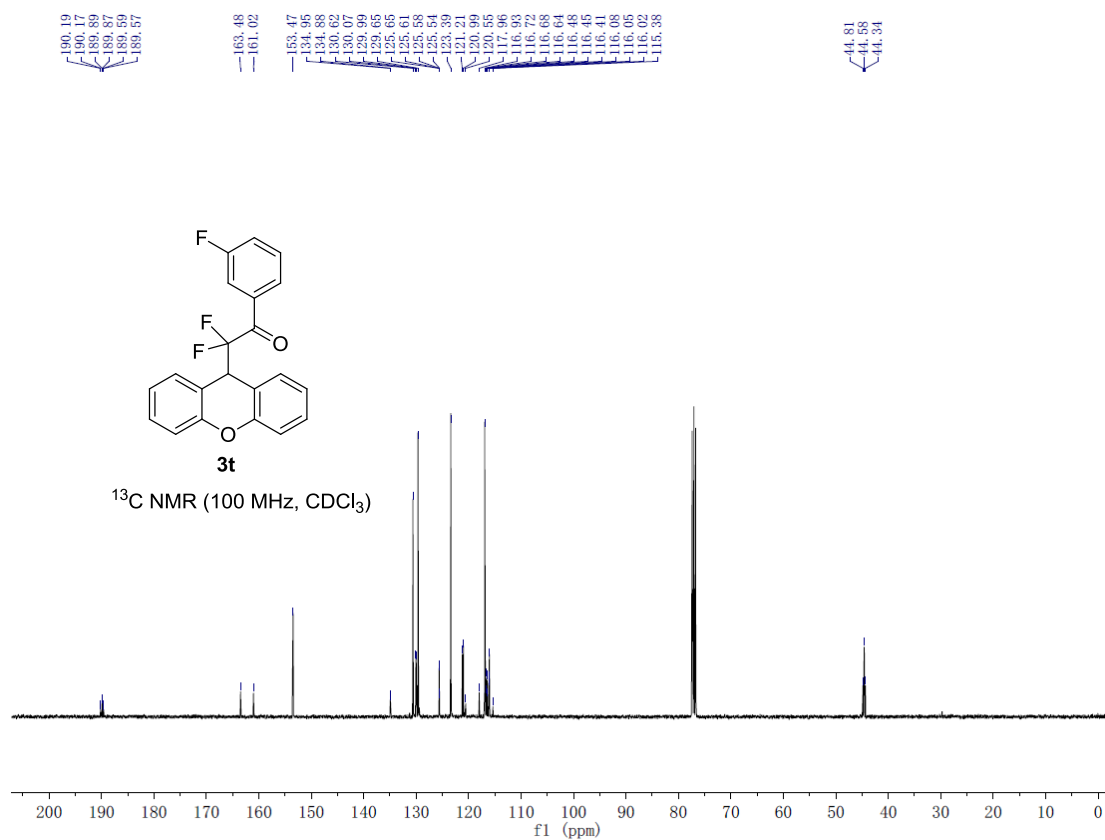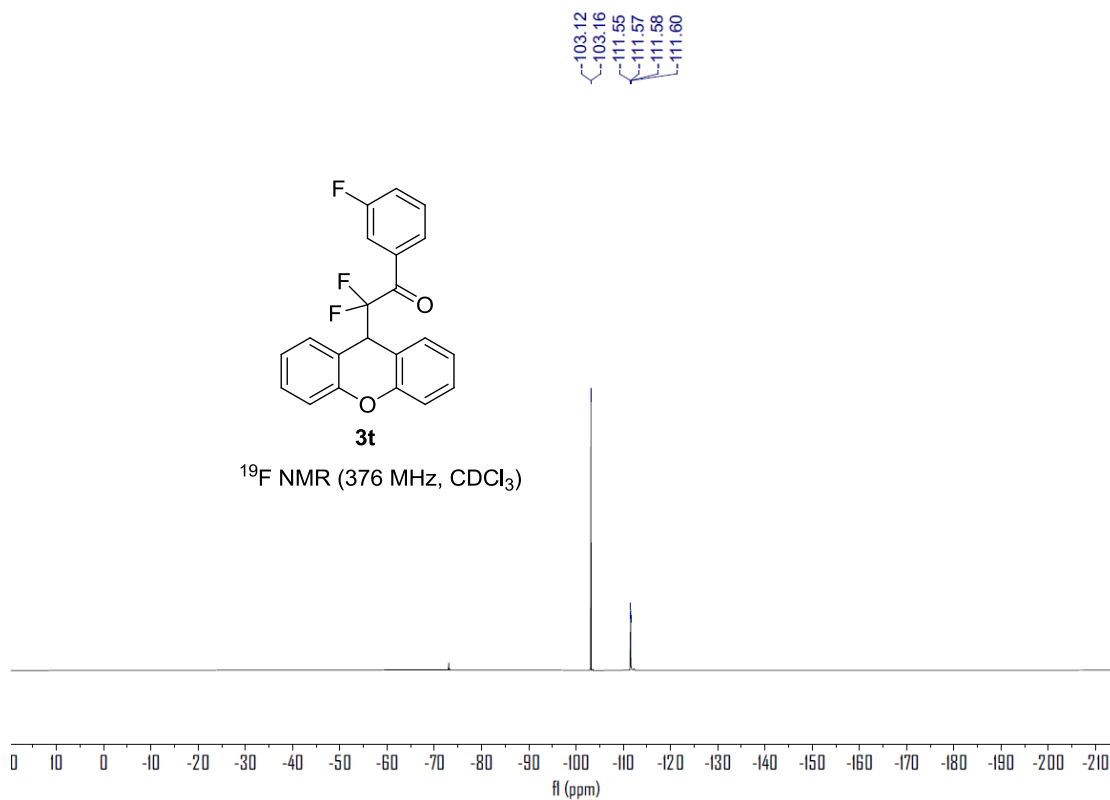

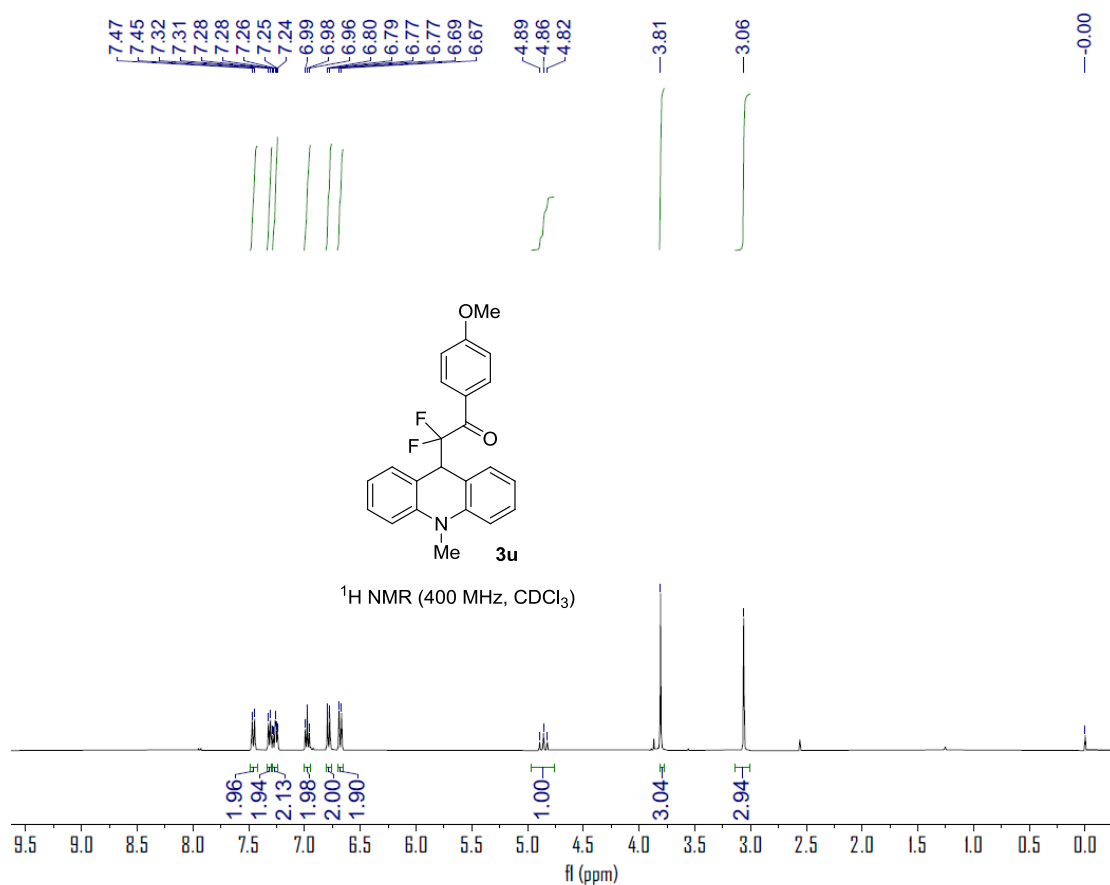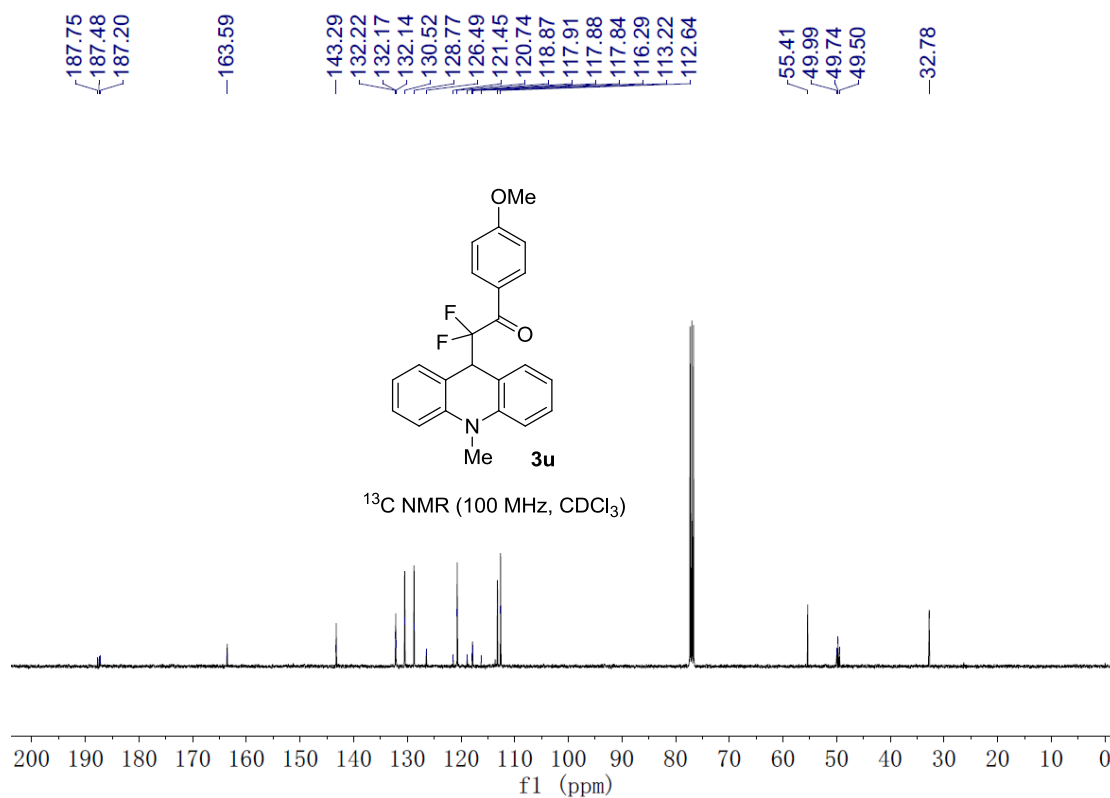

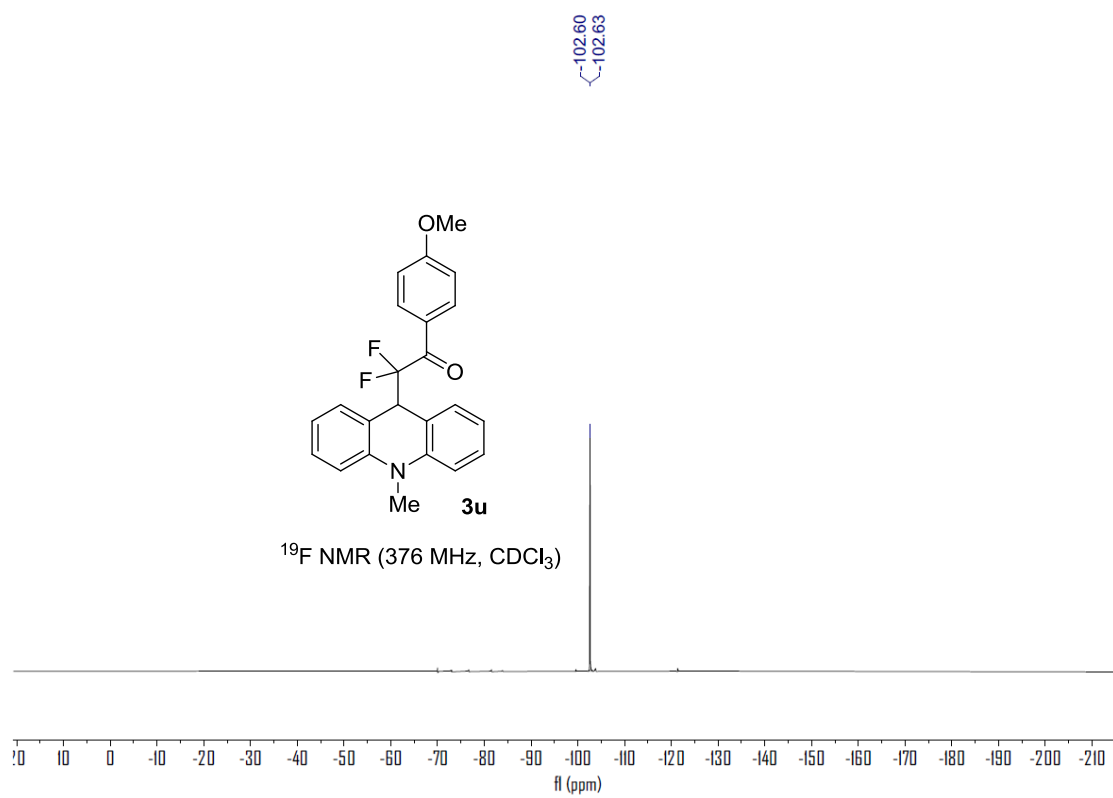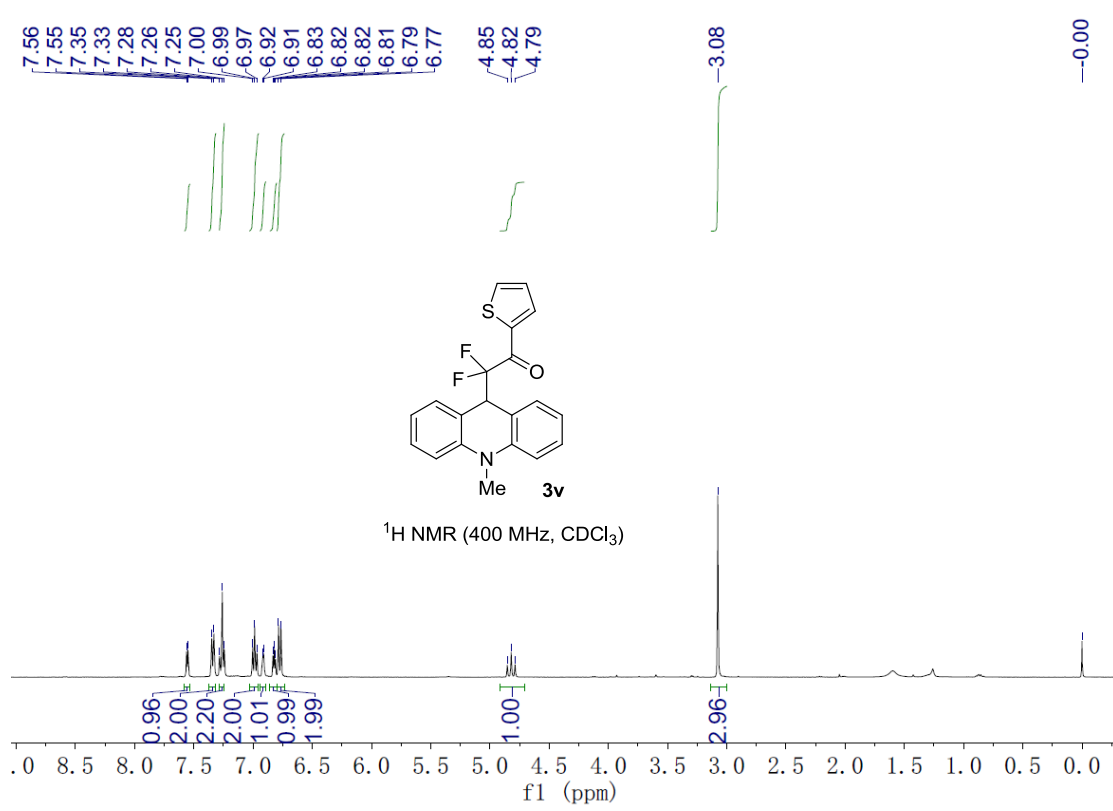

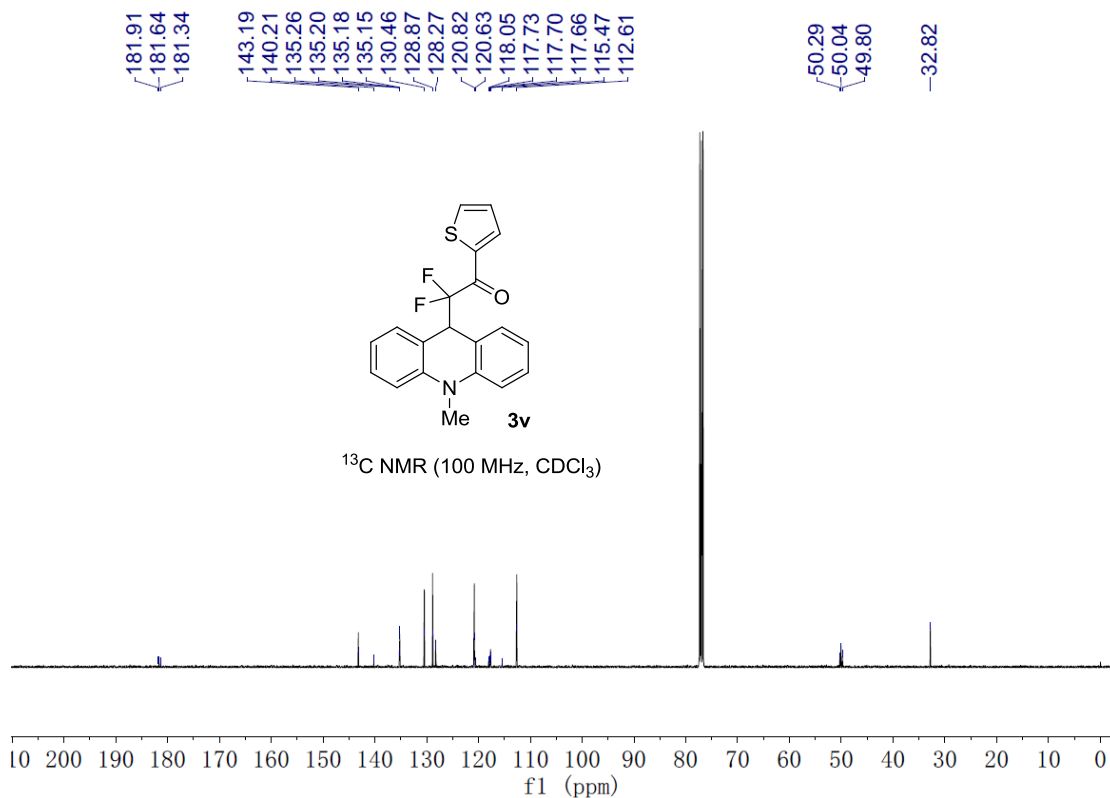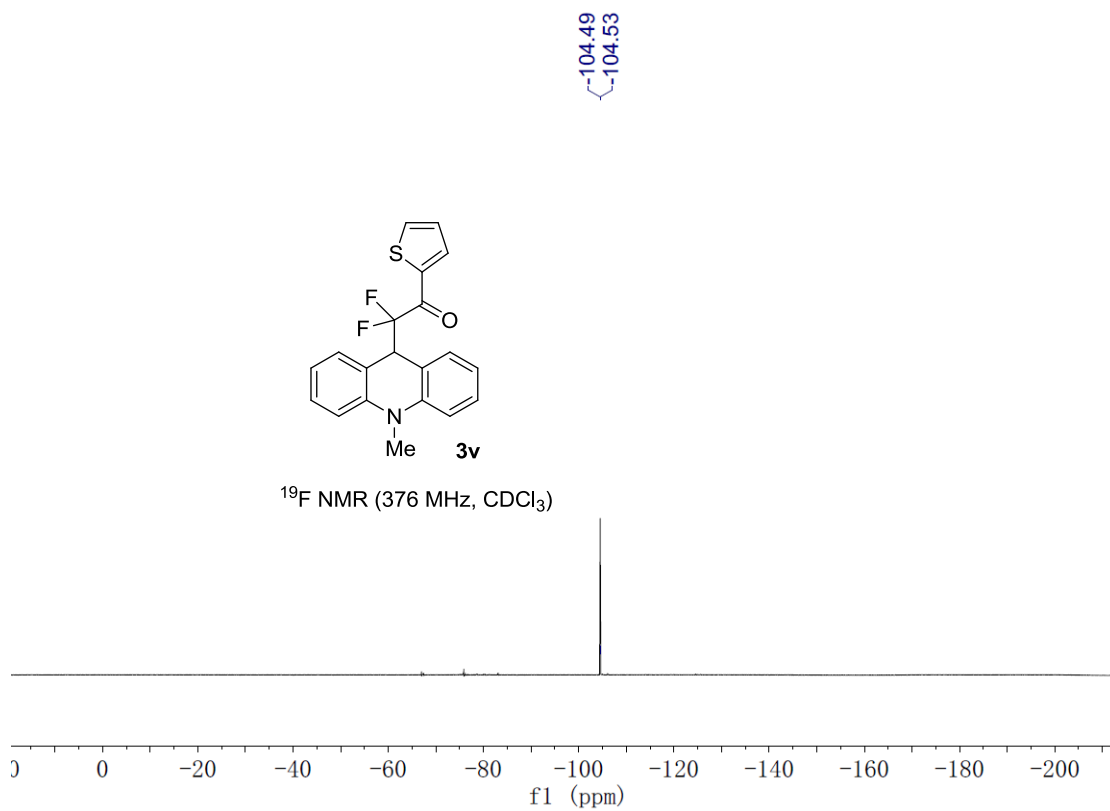



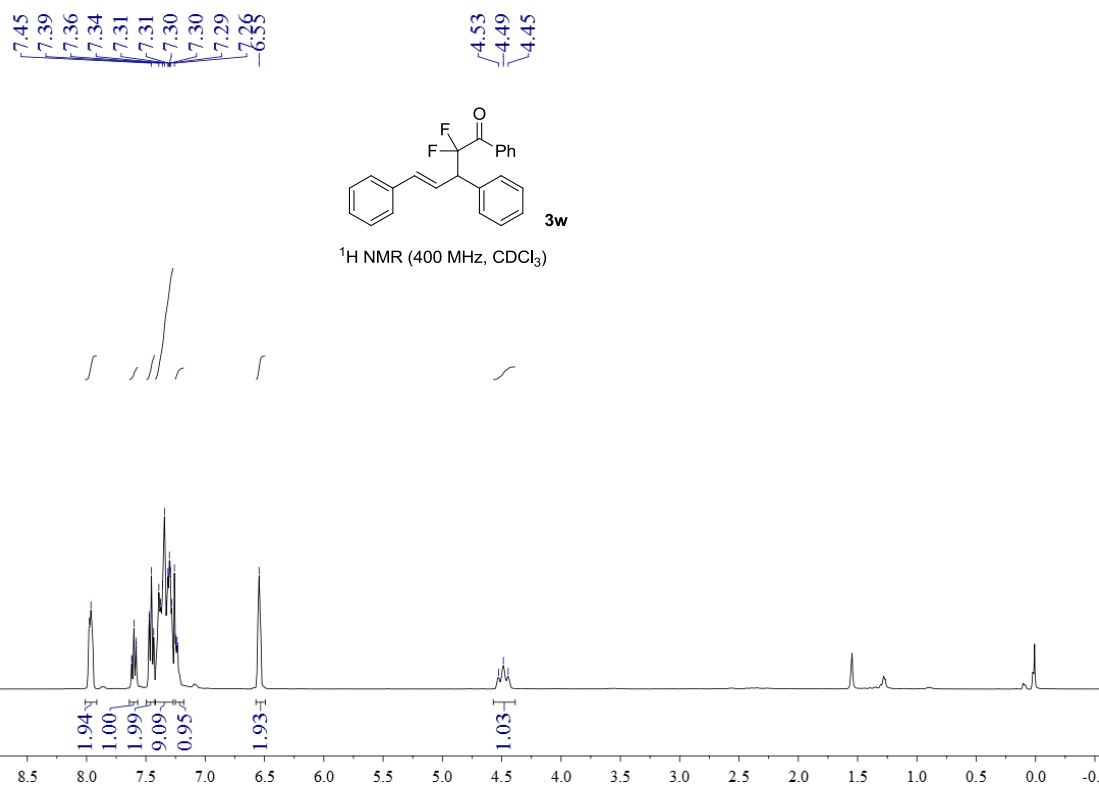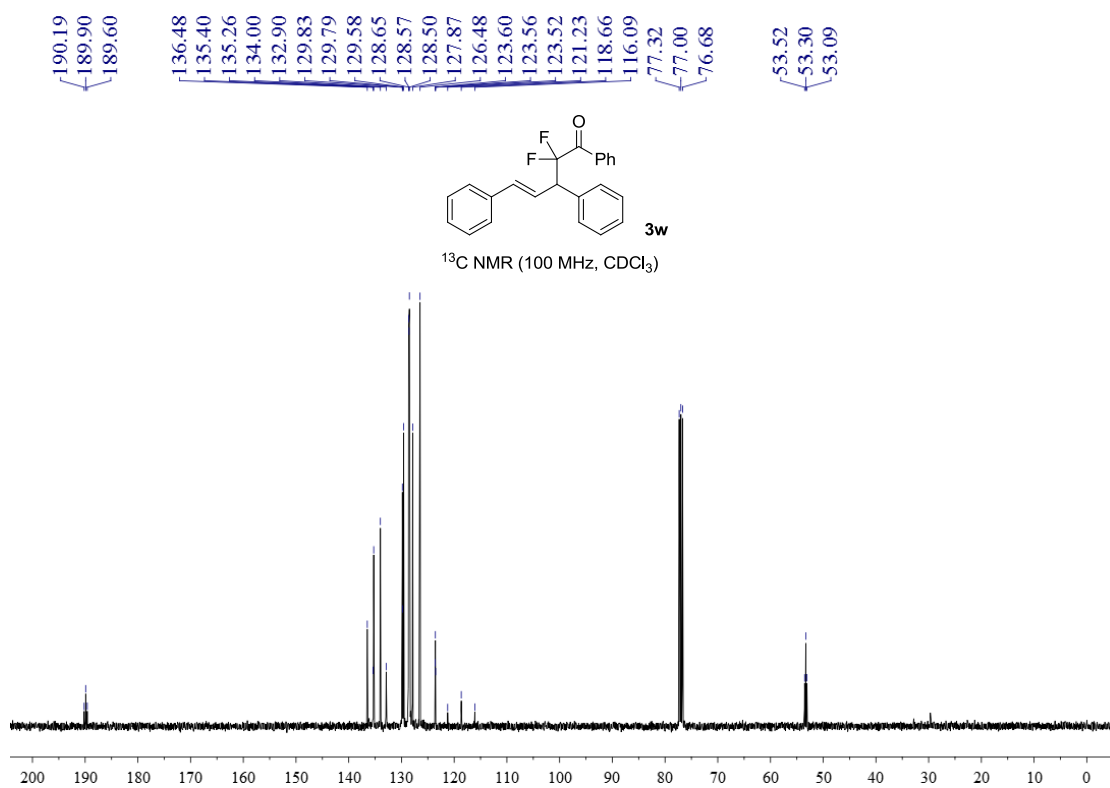

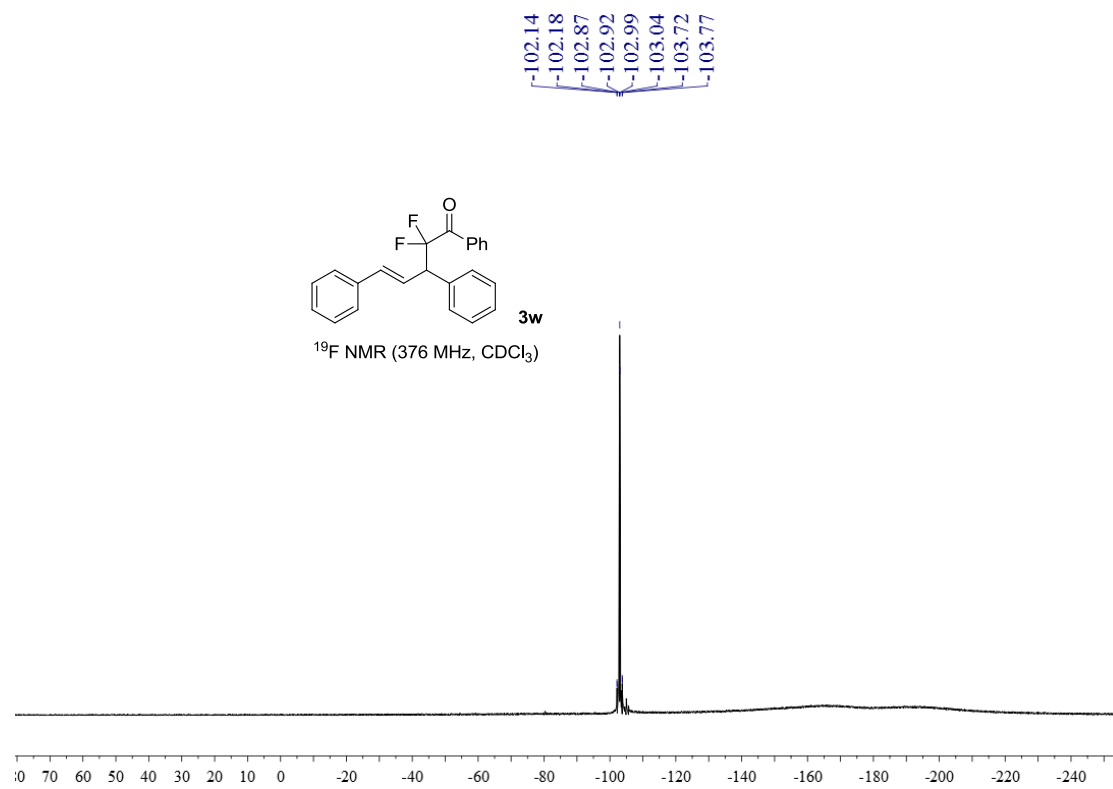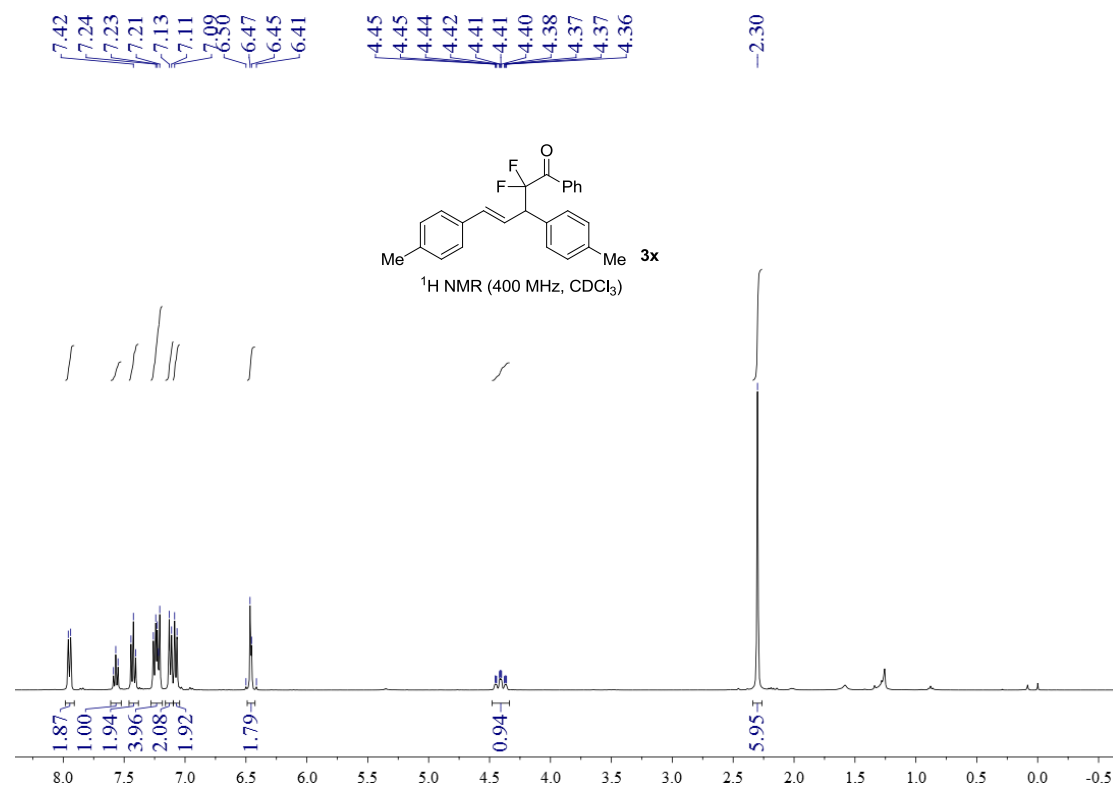

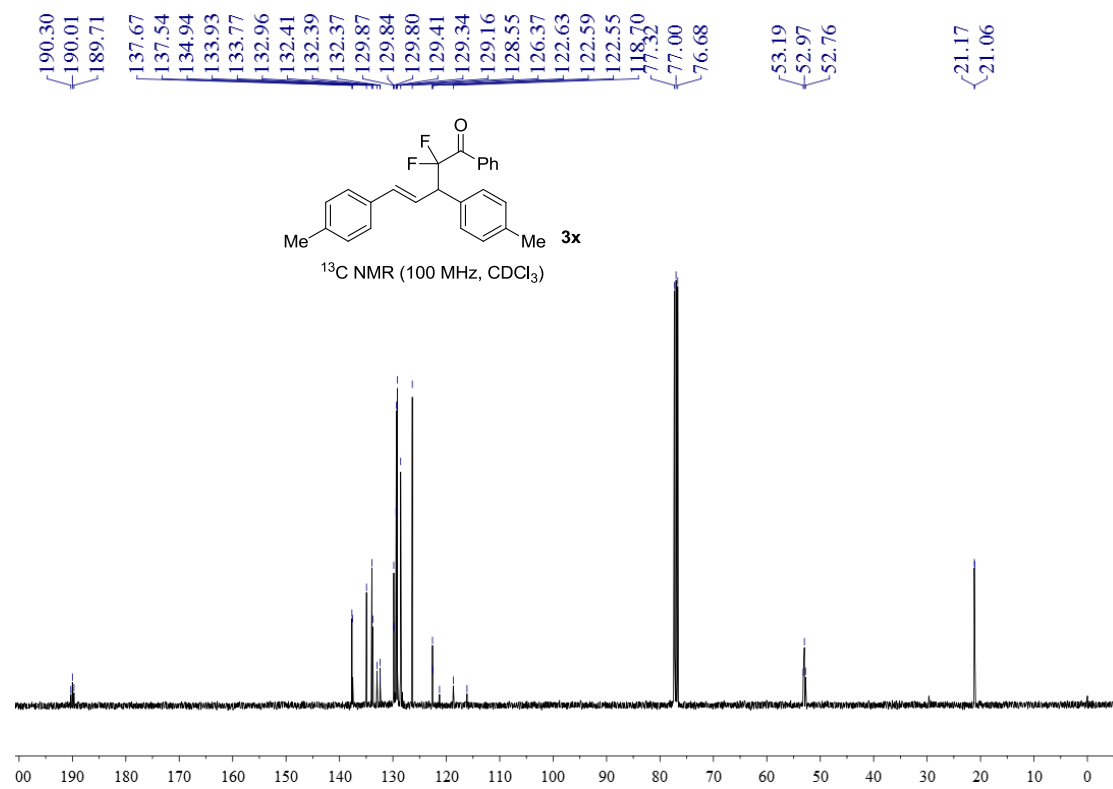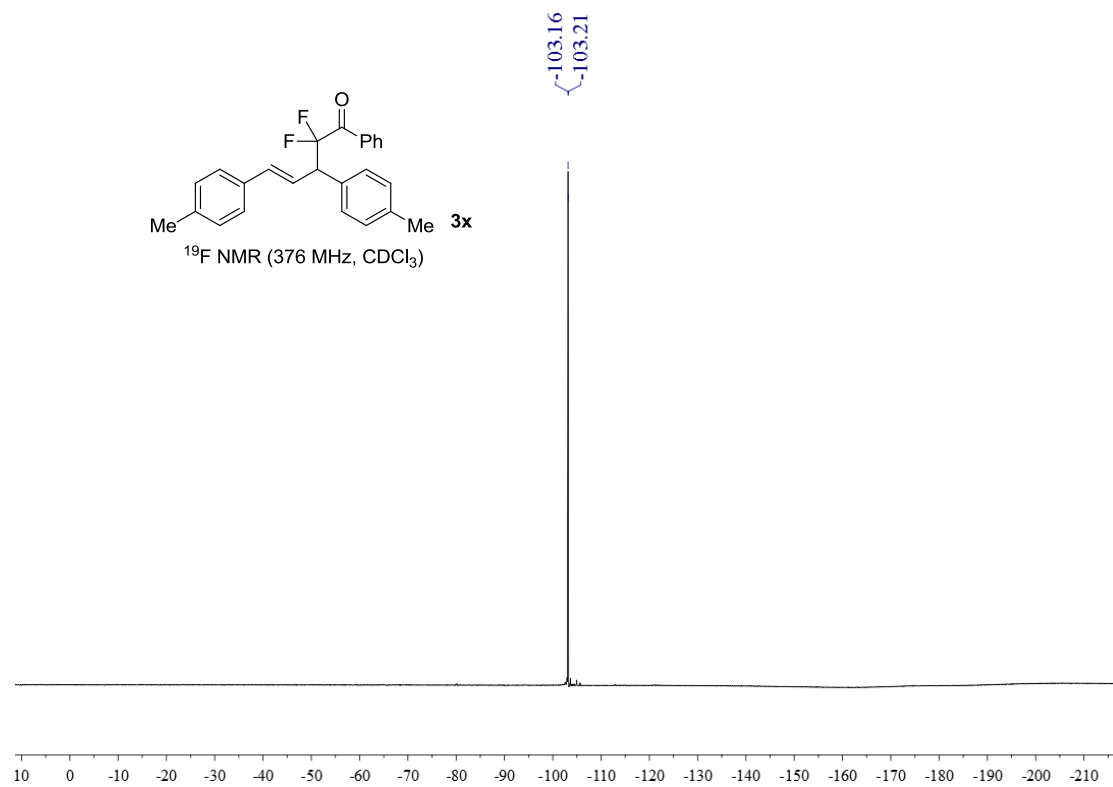

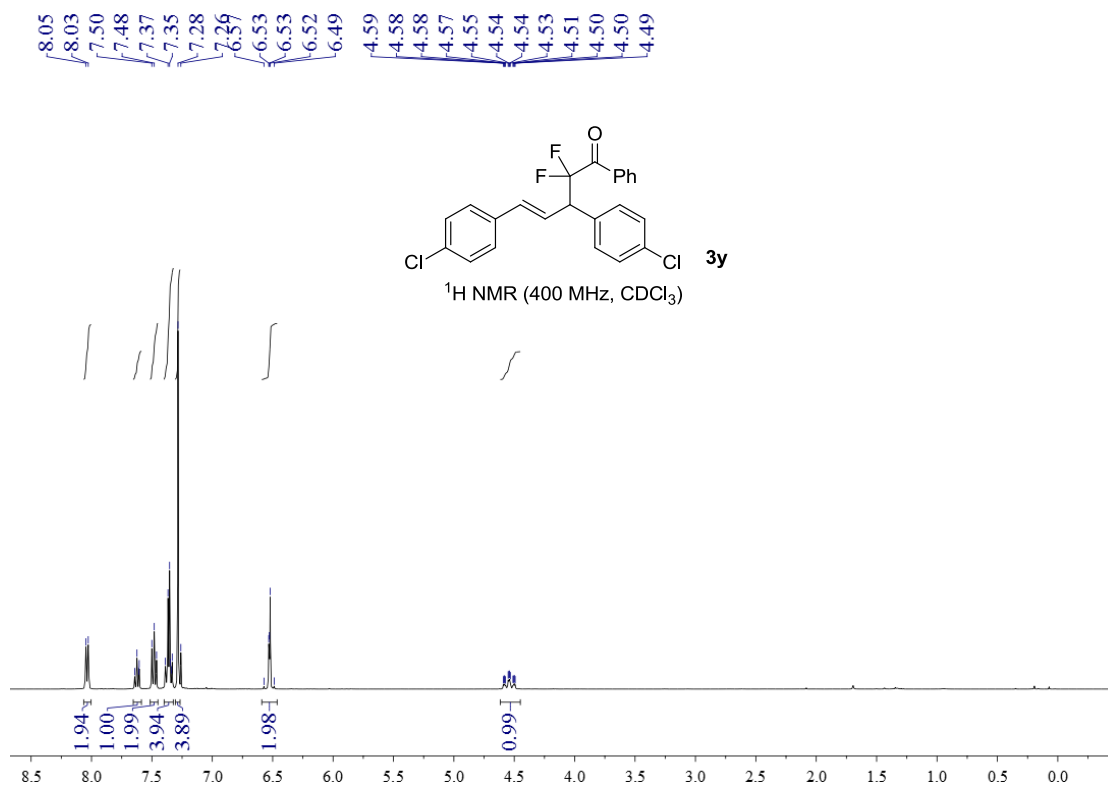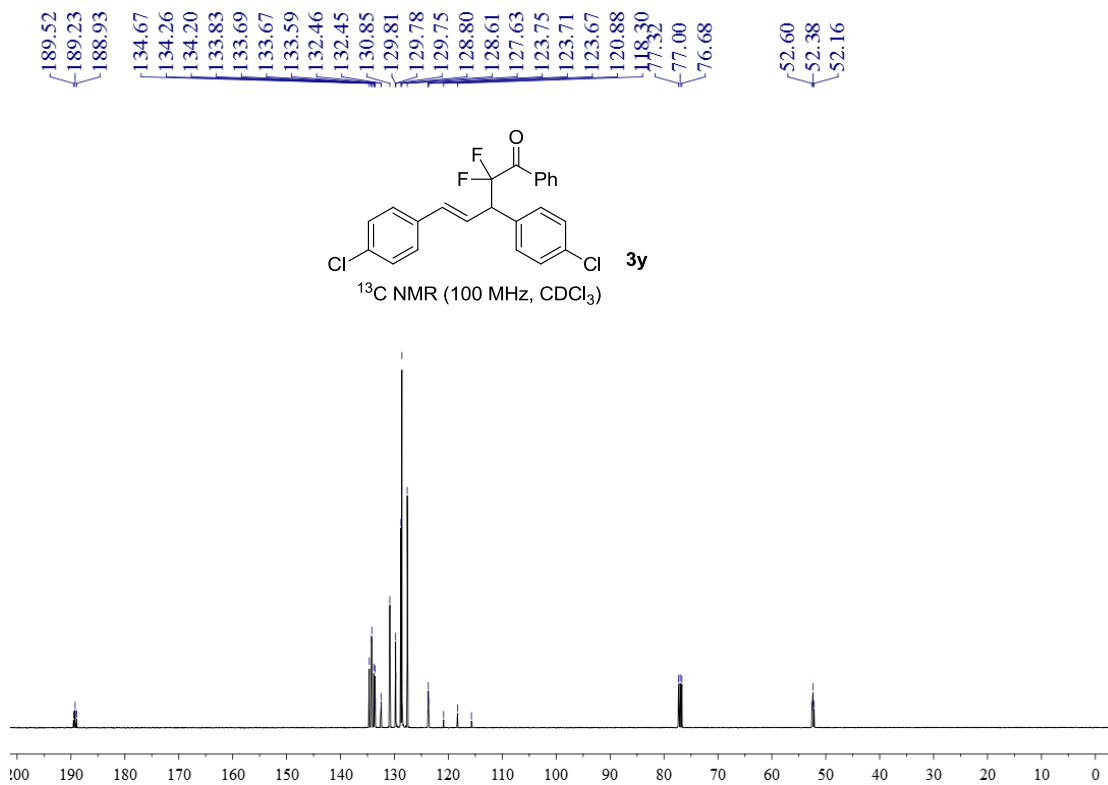

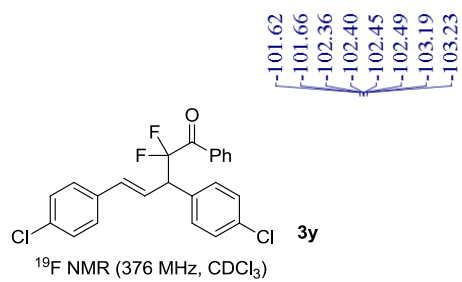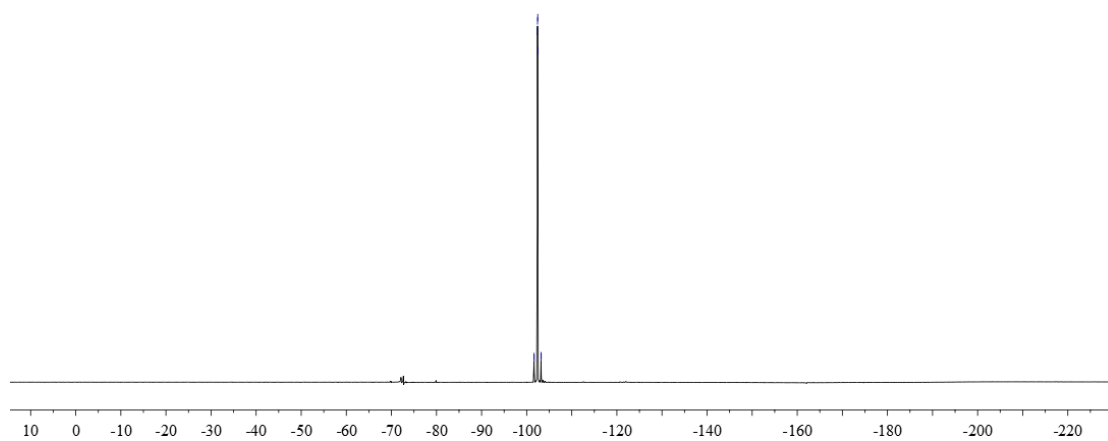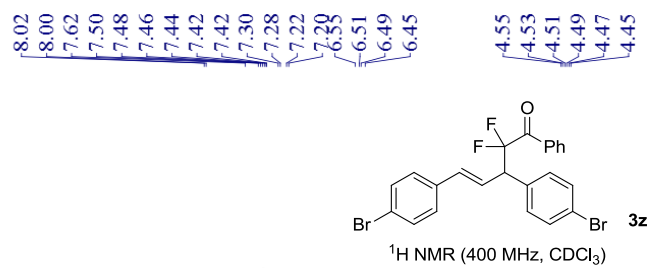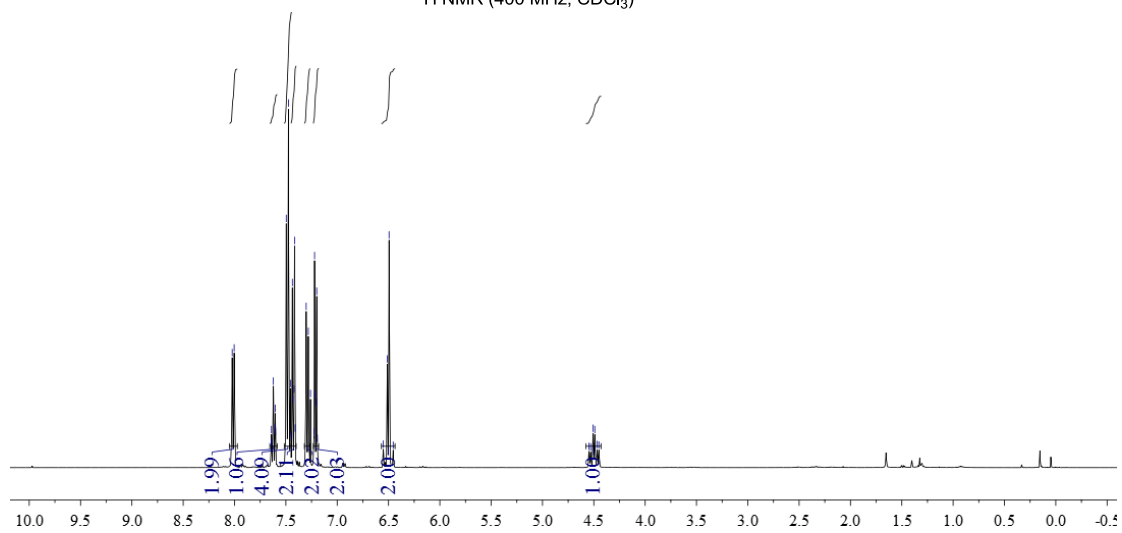

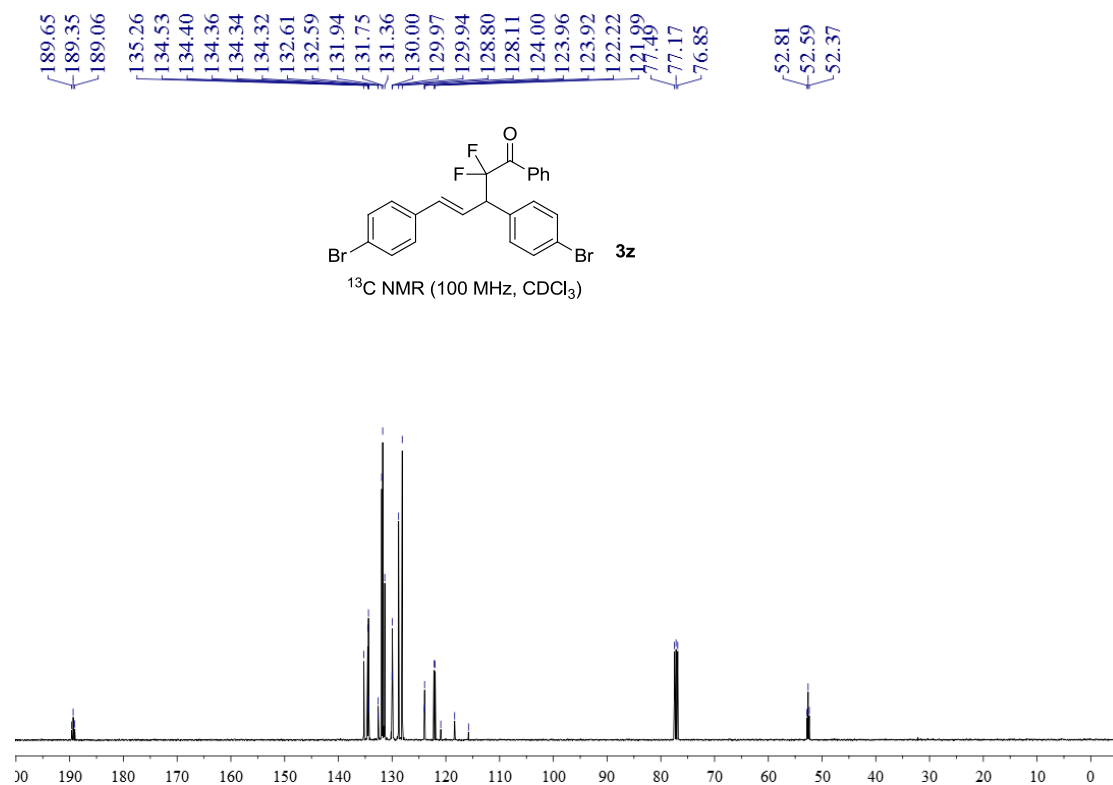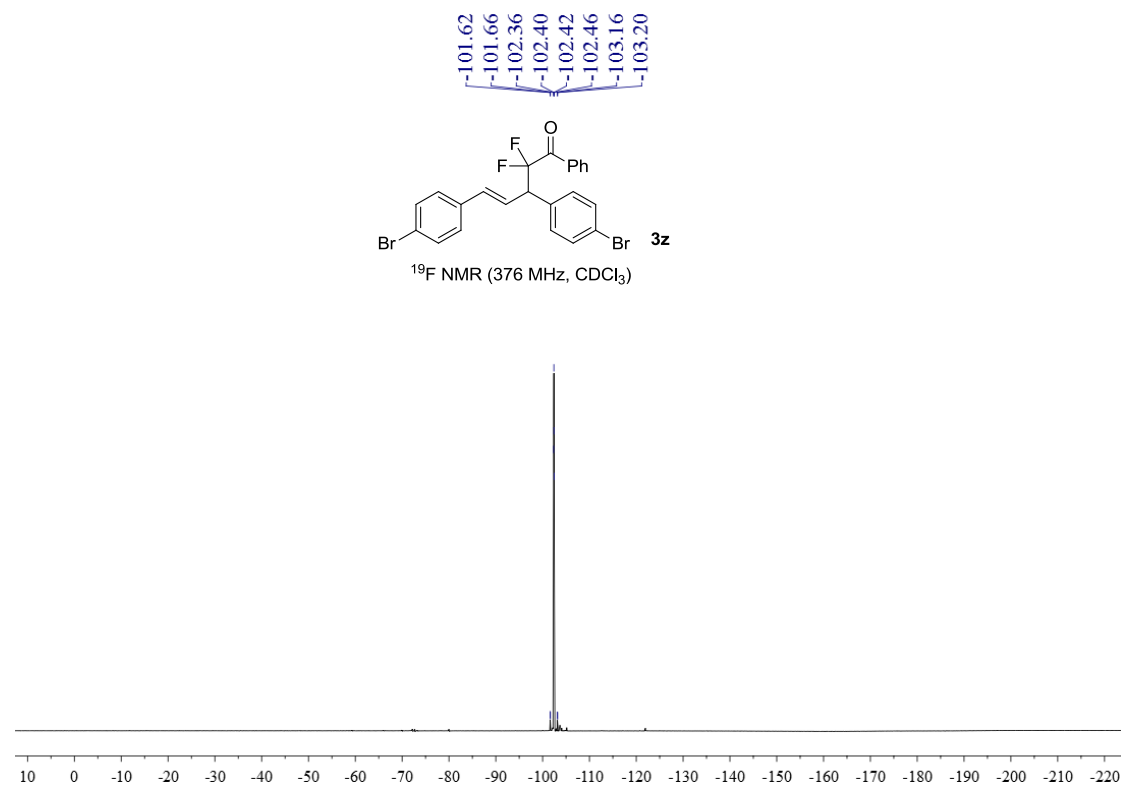

8.08  
8.08  
8.06  
7.60  
7.58  
7.49  
7.47  
7.41  
7.39  
7.39  
7.38  
7.37  
7.30  
7.29  
4.96  
4.95  
4.93  
4.92  
4.91  
4.90  
4.89  
4.88

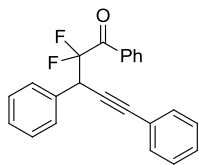

**3aa**

<sup>1</sup>H NMR (400 MHz, CDCl<sub>3</sub>)

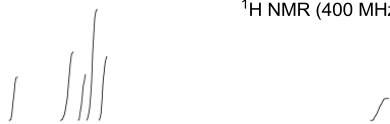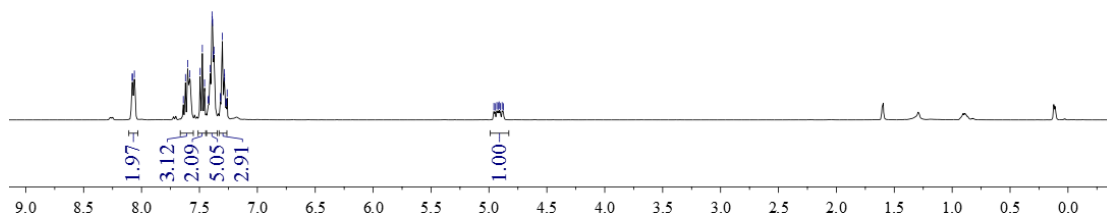

189.90  
189.61  
189.60  
189.31  
134.15  
132.86  
132.42  
132.40  
131.72  
130.09  
130.06  
130.03  
130.02  
129.99  
129.55  
128.67  
128.57  
128.48  
128.46  
128.18  
127.35  
86.74  
83.48  
83.46  
83.39  
83.36  
77.32  
77.00  
76.68  
43.83  
43.60  
43.56  
43.33

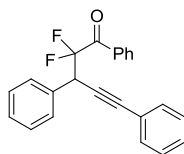

**3aa**

<sup>13</sup>C NMR (100 MHz, CDCl<sub>3</sub>)

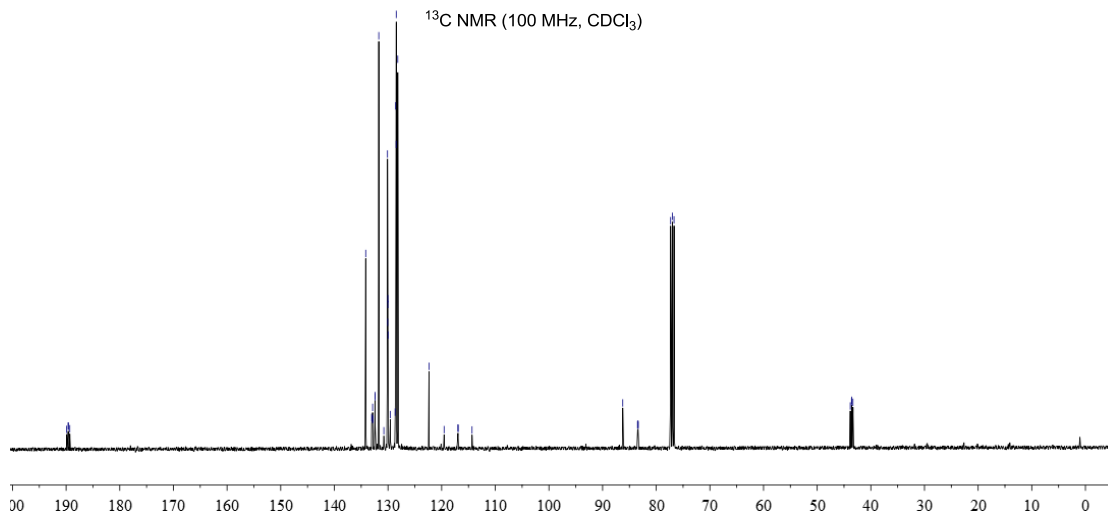

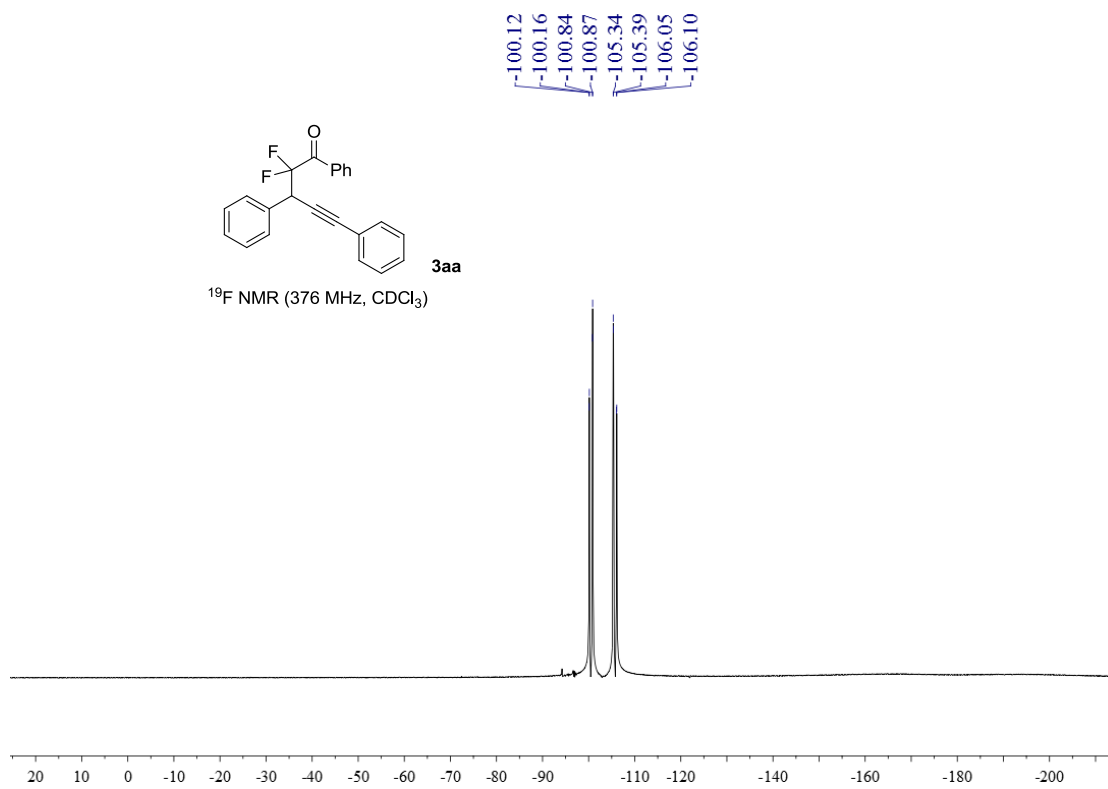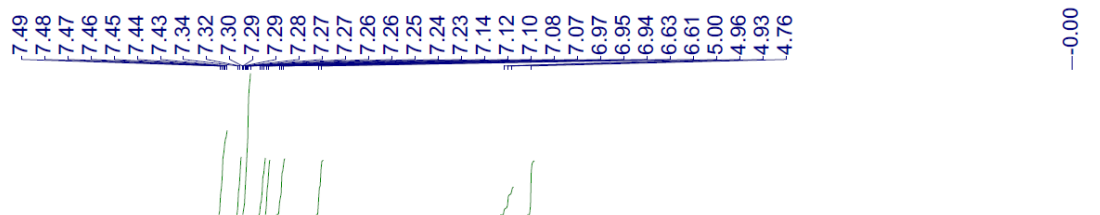



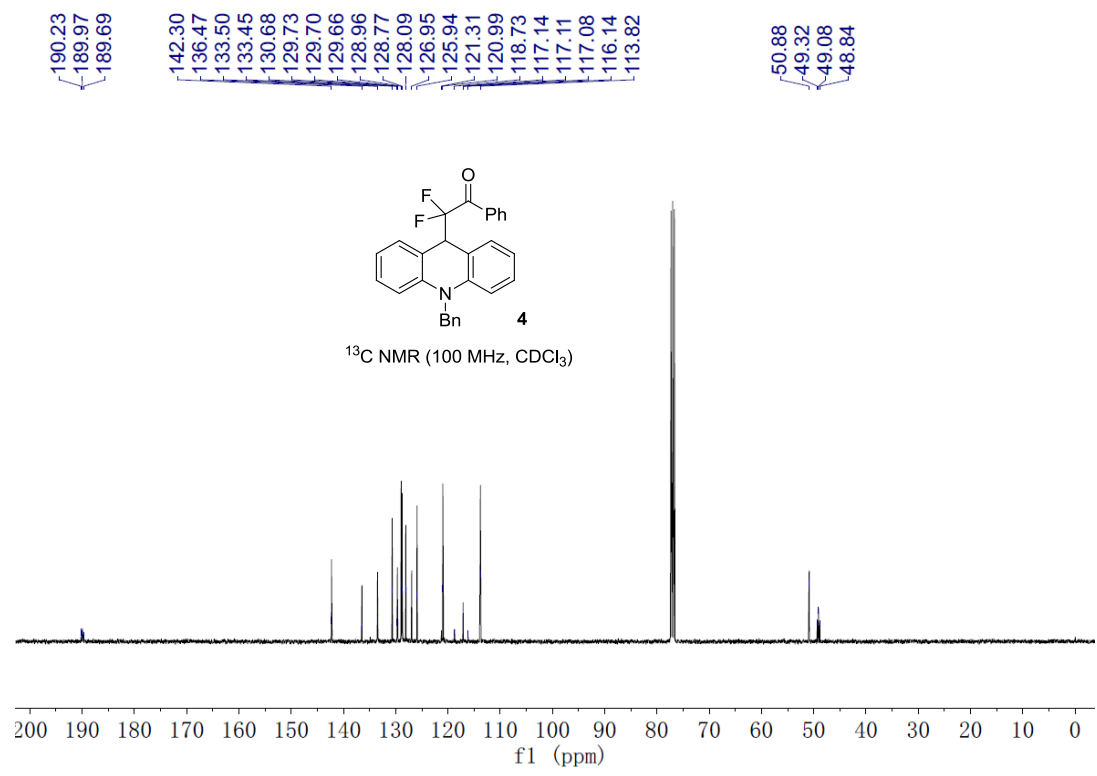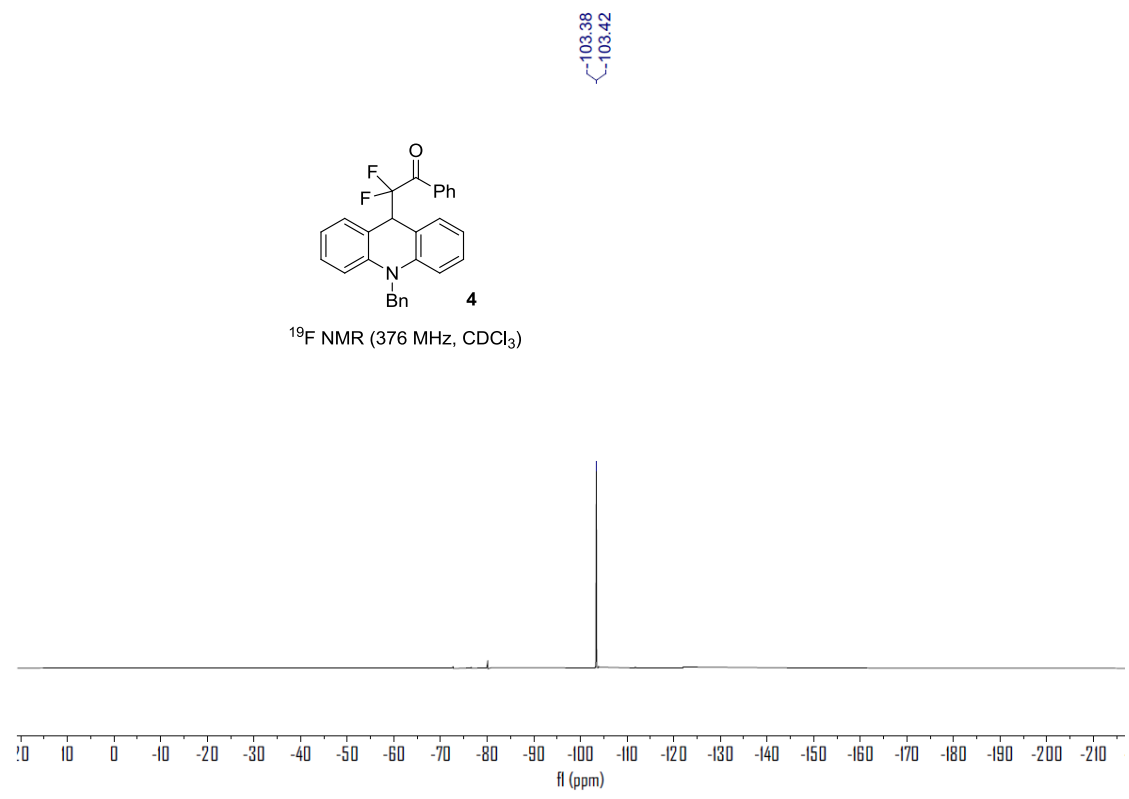

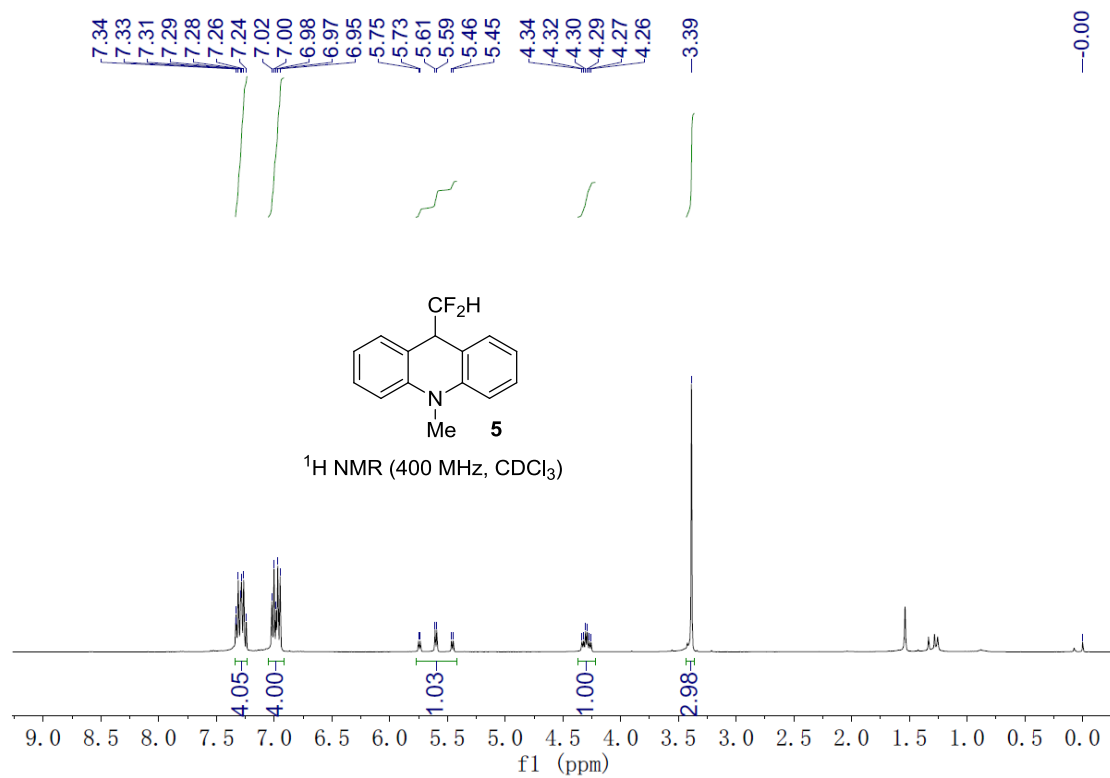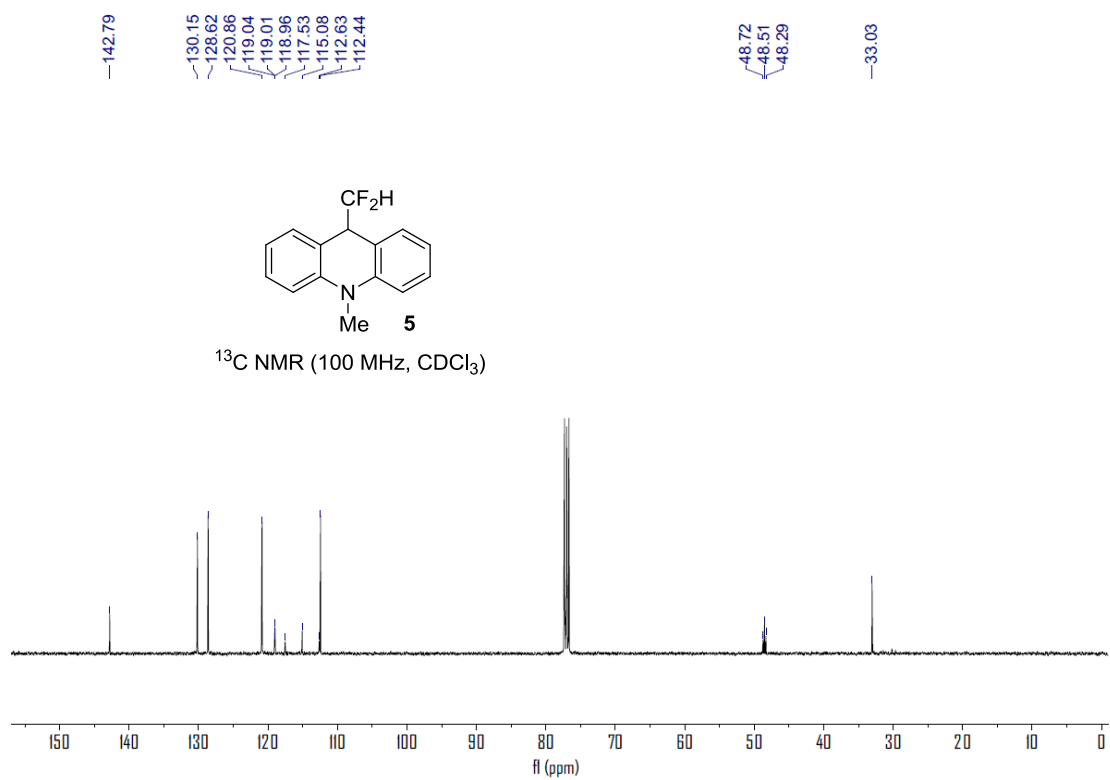

120.74  
120.77  
120.89  
120.92

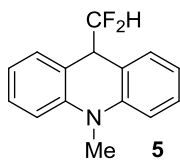

$^{19}\text{F}$  NMR (376 MHz,  $\text{CDCl}_3$ )

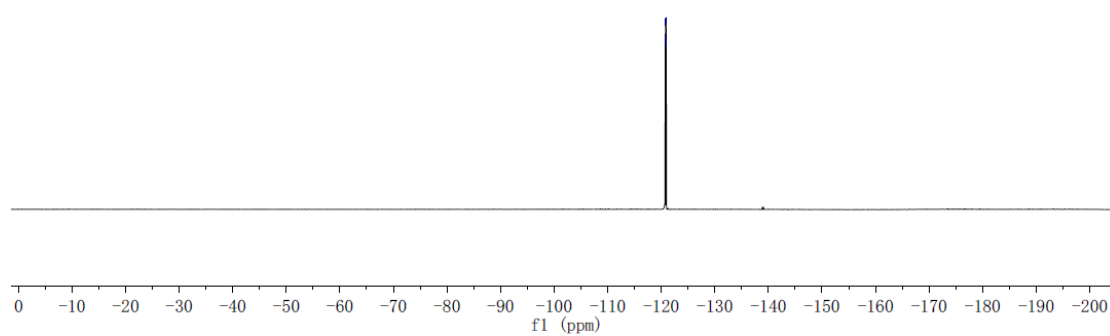

7.52, 7.50, 7.35, 7.33, 7.31, 7.30, 7.27, 7.24, 7.04, 7.02, 7.00, 6.98, 6.97, 6.94, 6.92, 4.88, 4.86, 4.82, 4.80, 4.71, 4.66, 3.38, 2.37, 2.36, 0.00

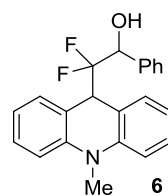

$^1\text{H}$  NMR (400 MHz,  $\text{CDCl}_3$ )

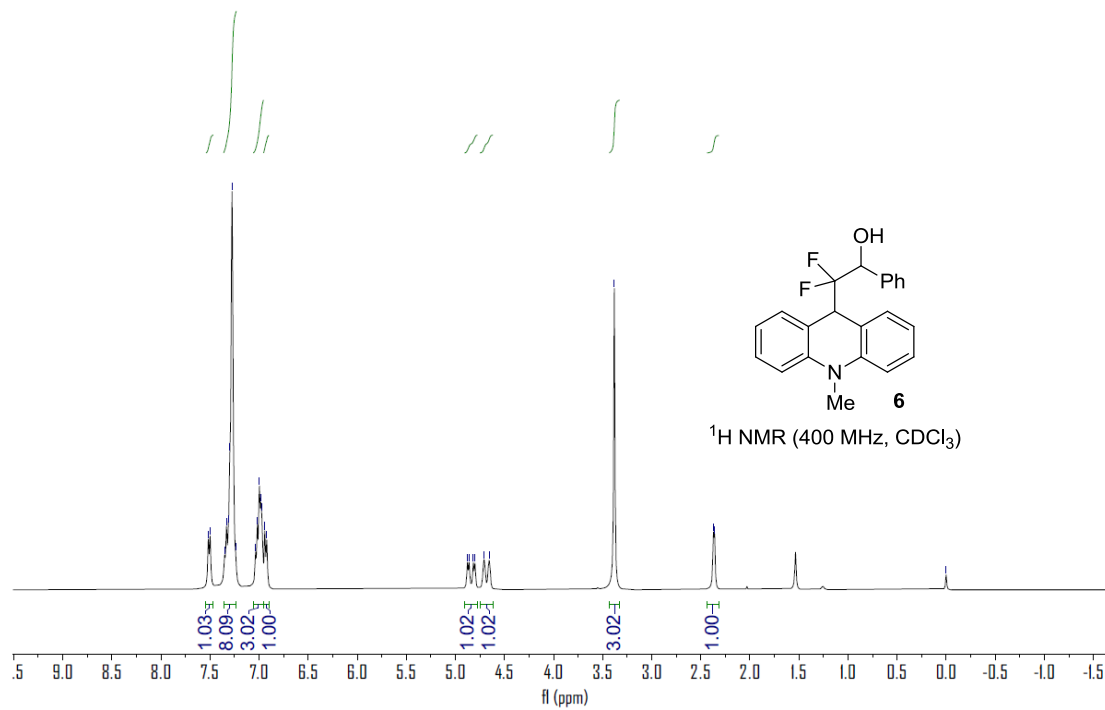

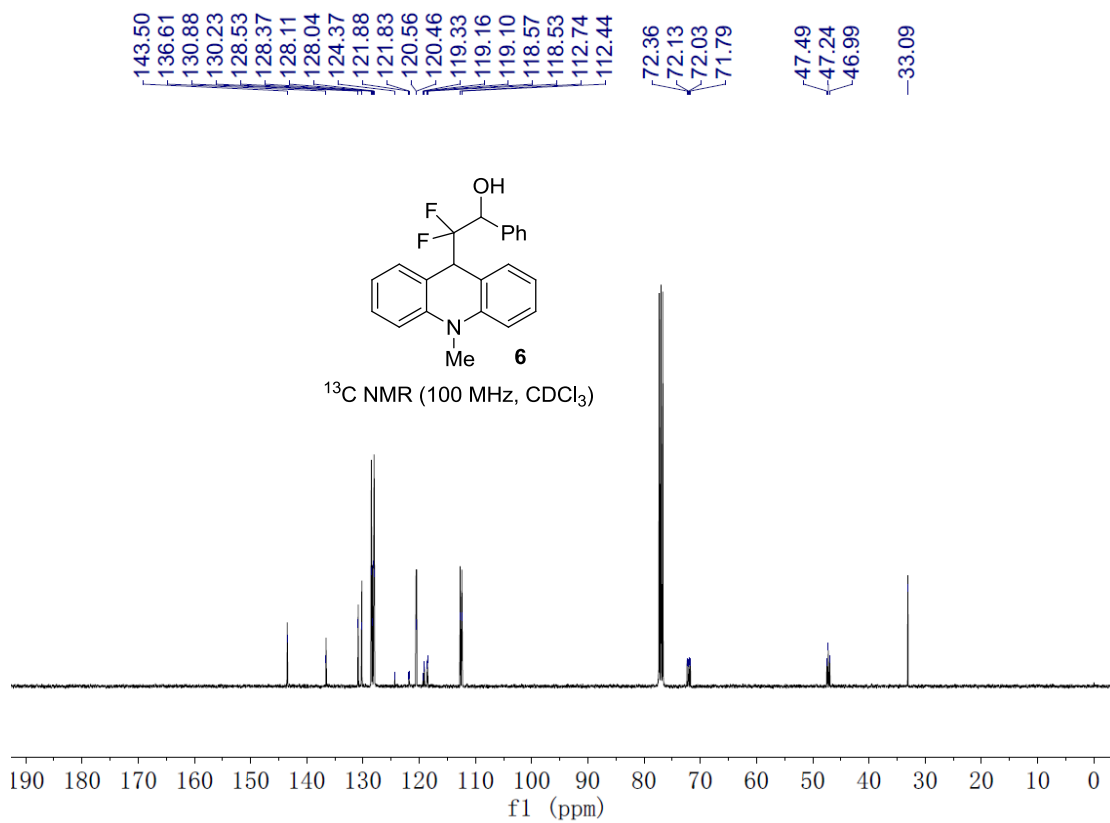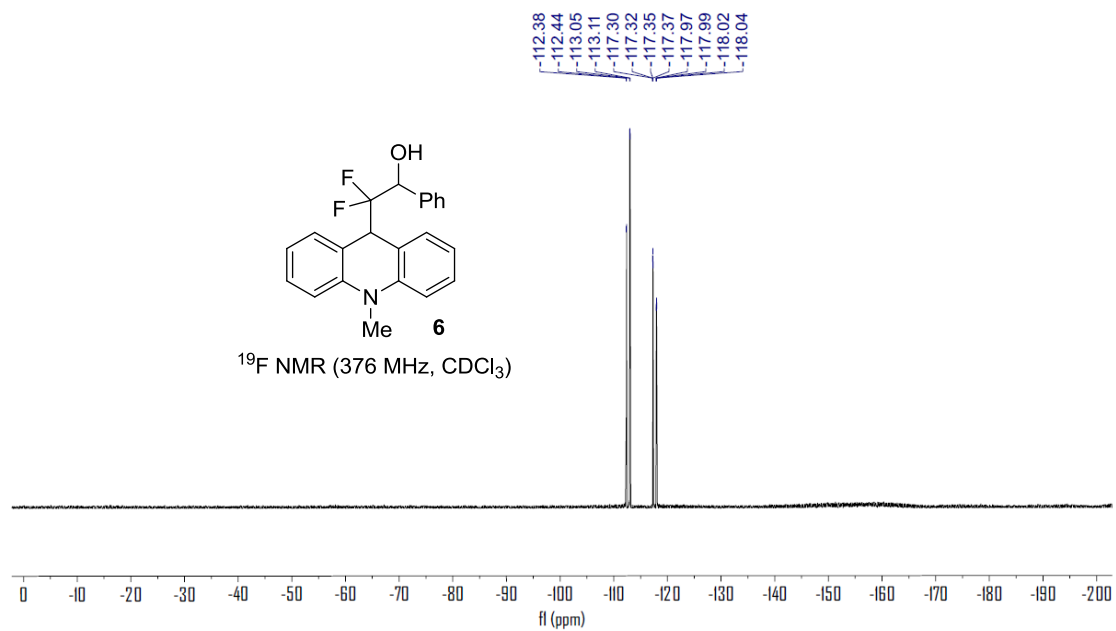

Supplement: d2qo00857b1.pdf [file d2qo00857b1.pdf]
